# Supplementary material for: DNA microarray analysis reveals that antibiotic resistance-gene diversity in human gut microbiota is age related
Source: PubMed Central journal article supplement — Sci Rep. 2014 Mar 12;4:4302. doi: 10.1038/srep04302 (PMC3950639; doi:10.1038/srep04302), 2014-03-12
Supplement: srep04302-s1.pdf [file srep04302-s1.pdf]

# Supplementary Information

## **DNA microarray analysis reveals the antibiotic resistance gene diversity in human gut microbiota is age-related**

Na Lu<sup>#1,2</sup>, Yongfei Hu<sup>#1,2</sup>, Liying Zhu<sup>3#</sup>, Xi Yang<sup>1,2</sup>, Yeshe Yin<sup>3</sup>, Fang Lei<sup>4</sup>, Yongliang Zhu<sup>5</sup>,  
Qin Du<sup>5</sup>, Xin Wang<sup>3</sup>, Zhiqi Meng<sup>3\*</sup>, Baoli Zhu<sup>1,2\*</sup>

<sup>1</sup>CAS key Laboratory of Pathogenic Microbiology and Immunology, Institute of Microbiology, Chinese Academy of Sciences, Beijing, China; <sup>2</sup>Beijing Key Laboratory of Pathogenic Drug Resistance and Genomics, Institute of Microbiology, Chinese Academy of Sciences, Beijing, China; <sup>3</sup>Institute of Plant Protection and Microbiology, Zhejiang Academy of Agricultural Sciences, Hangzhou, China; <sup>4</sup>Tianjin Institute of Industrial Biotechnology, Chinese Academy of Sciences, Tianjin, China; <sup>5</sup>Dept. of Gastroenterology, Second Affiliated Hospital of Zhejiang University School of Medicine, Hangzhou, China.

<sup>#</sup> Contributed equally.

\*Corresponding author. Mailing address for Baoli Zhu: CAS Key Laboratory of Pathogenic Microbiology and Immunology, Institute of Microbiology, Chinese Academy of Sciences, Beijing 100101, China. Phone: (86)10-64807362. Fax: (86)10-64807358. E-mail: [zhubaoli@im.ac.cn](mailto:zhubaoli@im.ac.cn).

**Supplementary Table 1 Detailed information of the antibiotic resistance gene microarray designed in this study**

| <b>Resistance type</b>                                                | <b>Required</b>                  | <b>GenBank NO.</b>                                                                                       | <b>Position</b>                                                                                                 |
|-----------------------------------------------------------------------|----------------------------------|----------------------------------------------------------------------------------------------------------|-----------------------------------------------------------------------------------------------------------------|
| <b>AAC2IA_1</b>                                                       | <b>Aminoglycoside Resistance</b> |                                                                                                          |                                                                                                                 |
| 6_n_netilmicin<br>dibekacin<br>gentamicin<br>netilmicin<br>tobramycin | None                             | L06156                                                                                                   | 264-797                                                                                                         |
| <b>AAC2IB_1</b>                                                       | <b>Aminoglycoside Resistance</b> |                                                                                                          |                                                                                                                 |
| 6_n_netilmicin<br>dibekacin<br>gentamicin<br>netilmicin<br>tobramycin | None                             | U41471                                                                                                   | 265-849                                                                                                         |
| <b>AAC2IC_3</b>                                                       | <b>Aminoglycoside Resistance</b> |                                                                                                          |                                                                                                                 |
| 6_n_netilmicin<br>dibekacin<br>gentamicin<br>netilmicin<br>tobramycin | None                             | AE000516<br>CP000325<br>U72714                                                                           | 314427-314969<br>1271687-1272229<br>373-915                                                                     |
| <b>AAC2ID_2</b>                                                       | <b>Aminoglycoside Resistance</b> |                                                                                                          |                                                                                                                 |
| 6_n_netilmicin<br>dibekacin<br>gentamicin<br>netilmicin<br>tobramycin | None                             | CP000480<br>U72743                                                                                       | 510212-510841<br>386-1015                                                                                       |
| <b>AAC2I_1</b>                                                        | <b>Aminoglycoside Resistance</b> |                                                                                                          |                                                                                                                 |
| 6_n_netilmicin<br>dibekacin<br>gentamicin<br>netilmicin<br>tobramycin | None                             | CP000384                                                                                                 | 305541-306161                                                                                                   |
| <b>AAC3IA_17</b>                                                      | <b>Aminoglycoside Resistance</b> |                                                                                                          |                                                                                                                 |
| astromicin<br>gentamicin<br>sisomicin                                 | None                             | AB254131<br>AF025392<br>AF207065<br>AF263520<br>AF318077<br>AF550679<br>AJ009820<br>AJ310480<br>AJ877225 | 1736-2266<br>670-1200<br>900-1361<br>2801-3262<br>2035-2496<br>82815-83276<br>930-1391<br>488-1018<br>5296-5757 |

| Resistance type   | Required                         | GenBank NO. | Position           |
|-------------------|----------------------------------|-------------|--------------------|
|                   |                                  | AM087409    | 1022-1483          |
|                   |                                  | AY037297    | 5981-6511          |
|                   |                                  | AY139604    | 44-574             |
|                   |                                  | AY577724    | 44-592             |
|                   |                                  | CU459141    | 3623868-3624398    |
|                   |                                  | DQ530421    | 83-613             |
|                   |                                  | EF199842    | 5718-6248          |
|                   |                                  | EU851865    | 118-648            |
| <b>AAC3IIA_8</b>  | <b>Aminoglycoside Resistance</b> |             |                    |
| dibekacin         | None                             | AF466526    | 2388-3245          |
| gentamicin        |                                  | AF550415    | 62773-63630        |
| netilmicin        |                                  | AY138987    | 4042-4899          |
| sisomicin         |                                  | AY191460    | 904-1758           |
| tobramycin        |                                  | EU022315    | 1-858              |
|                   |                                  | EU839488    | 1177-1902          |
|                   |                                  | X13543      | 186-1043           |
|                   |                                  | X54723      | 819-1676           |
| <b>AAC3IIB_1</b>  | <b>Aminoglycoside Resistance</b> |             |                    |
| dibekacin         | None                             | M97172      | 656-1462           |
| gentamicin        |                                  |             |                    |
| netilmicin        |                                  |             |                    |
| sisomicin         |                                  |             |                    |
| tobramycin        |                                  |             |                    |
| <b>AAC3III-1</b>  | <b>Aminoglycoside Resistance</b> |             |                    |
| dibekacin         | None                             | X55652      | 1124-1936          |
| gentamicin        |                                  |             |                    |
| kanamycin         |                                  |             |                    |
| lividomycin       |                                  |             |                    |
| neomycin          |                                  |             |                    |
| paromomycin       |                                  |             |                    |
| sisomicin         |                                  |             |                    |
| tobramycin        |                                  |             |                    |
| <b>AAC3IV_4</b>   | <b>Aminoglycoside Resistance</b> |             |                    |
| apramycin         | None                             | AB257725    | 2182-2919          |
| dibekacin         |                                  | AF061923    | 2145-2186          |
| gentamicin        |                                  | AJ414670    | 551-1288 1284-1325 |
| netilmicin        |                                  | DQ124229    | 1729-2502          |
| sisomicin         |                                  |             | 613-1386           |
| tobramycin        |                                  |             |                    |
| <b>AAC3IX_1</b>   | <b>Aminoglycoside Resistance</b> |             |                    |
| neomycin          | None                             | M55427      | 274-1116           |
| <b>AAC3VIII_3</b> | <b>Aminoglycoside Resistance</b> |             |                    |
| neomycin          | None                             | AB211959    | 30752-31612        |



| <b>Resistance type</b> | <b>Required</b> | <b>GenBank NO.</b> | <b>Position</b> |
|------------------------|-----------------|--------------------|-----------------|
|                        |                 | AF360385           | 1-603           |
|                        |                 | AF360386           | 1-603           |
|                        |                 | AF360387           | 1-603           |
|                        |                 | AF360388           | 1-603           |
|                        |                 | AF360389           | 1-603           |
|                        |                 | AF360390           | 1-603           |
|                        |                 | AF360391           | 1-603           |
|                        |                 | AF360392           | 1-603           |
|                        |                 | AF369871           | 1-603           |
|                        |                 | AF453998           | 1426-2007       |
|                        |                 | AF550679           | 3367-3951       |
|                        |                 | AJ009820           | 83355-83939     |
|                        |                 | AJ223604           | 268-852         |
|                        |                 | AJ243491           | 2347-2922       |
|                        |                 | AJ295229           | 1342-1929       |
|                        |                 | AJ311891           | 1061-1642       |
|                        |                 | AJ439689           | 2634-3218       |
|                        |                 | AJ971343           | 996-1586        |
|                        |                 | AM988778           | 388-972         |
|                        |                 | AM993098           | 4790-5365       |
|                        |                 | AY007784           | 1764-2339       |
|                        |                 | AY162283           | 2-562           |
|                        |                 | AY458016           | 374-958         |
|                        |                 | AY507153           | 11682-12266     |
|                        |                 | AY574992           | 4739-5320       |
|                        |                 | AY648341           | 108-692         |
|                        |                 | AY648342           | 1-603           |
|                        |                 | AY648343           | 1-603           |
|                        |                 | AY648344           | 1-603           |
|                        |                 | AY648345           | 1-603           |
|                        |                 | AY648346           | 1-603           |
|                        |                 | AY648347           | 1-603           |
|                        |                 | AY648348           | 1-603           |
|                        |                 | AY648349           | 1-603           |
|                        |                 | AY648350           | 1-603           |
|                        |                 | AY648351           | 1-603           |
|                        |                 | AY648352           | 1-603           |
|                        |                 | AY648353           | 1-603           |
|                        |                 | AY648354           | 1-603           |
|                        |                 | AY648355           | 1-603           |
|                        |                 | AY648356           | 1-603           |
|                        |                 | AY648357           | 1-603           |
|                        |                 | AY648358           | 1-603           |

| <b>Resistance type</b> | <b>Required</b> | <b>GenBank NO.</b> | <b>Position</b>    |
|------------------------|-----------------|--------------------|--------------------|
|                        |                 | AY648359           | 1-603              |
|                        |                 | AY648360           | 1-603              |
|                        |                 | AY648361           | 1-603              |
|                        |                 | AY648362           | 1-603              |
|                        |                 | AY648363           | 1-603              |
|                        |                 | AY648364           | 1-603              |
|                        |                 | AY648365           | 1-603              |
|                        |                 | AY648366           | 1-603              |
|                        |                 | AY648367           | 1-603              |
|                        |                 | AY648368           | 1-603              |
|                        |                 | AY648369           | 1-603              |
|                        |                 | AY648370           | 1-603              |
|                        |                 | AY648371           | 1-603              |
|                        |                 | AY648372           | 1-603              |
|                        |                 | AY648373           | 1-603              |
|                        |                 | AY648374           | 1-603              |
|                        |                 | AY648375           | 1-603              |
|                        |                 | AY648376           | 1-603              |
|                        |                 | AY648377           | 1-603              |
|                        |                 | AY648378           | 1-603              |
|                        |                 | AY686225           | 1-603              |
|                        |                 | AY920928           | 519-1103 2709-3290 |
|                        |                 | DQ139278           | 1167-1742          |
|                        |                 | DQ278189           | 5041-5616          |
|                        |                 | DQ393784           | 445-1035           |
|                        |                 | EF368053           | 554-1138           |
|                        |                 | EF577409           | 2461-3036          |
|                        |                 | EU117233           | 3091-3675          |
|                        |                 | EU358785           | 4330-4905          |
|                        |                 | EU383016           | 89-673             |
|                        |                 | EU434618           | 1142-1726          |
|                        |                 | EU523056           | 2004-2606          |
|                        |                 | EU675686           | 53-637             |
|                        |                 | EU886978           | 36223-36825        |
|                        |                 | FJ207466           | 33176-33778        |
|                        |                 | FJ223605           | 60-644             |
|                        |                 | M23634             | 26-610             |
|                        |                 | Y11947             | 1264-1857          |
|                        |                 | Y11948             | 17-601             |
|                        |                 |                    | 669-1253           |
|                        |                 |                    | 32287-32889        |
|                        |                 |                    | 355-957            |
|                        |                 |                    | 254-838            |

| Resistance type                                                              | Required                         | GenBank NO.                      | Position                           |
|------------------------------------------------------------------------------|----------------------------------|----------------------------------|------------------------------------|
|                                                                              |                                  |                                  | 233-817                            |
| <b>AAC6IC_1</b>                                                              | <b>Aminoglycoside Resistance</b> |                                  |                                    |
| amikacin<br>dibekacin<br>isepamicin<br>netilmicin<br>sisomicin<br>tobramycin | None                             | M94066                           | 1554-1991                          |
| <b>AAC6IE_3</b>                                                              | <b>Aminoglycoside Resistance</b> |                                  |                                    |
| amikacin<br>dibekacin<br>isepamicin<br>netilmicin<br>sisomicin<br>tobramycin | None                             | AB049452<br>AP003367<br>AY969045 | 4232-5668<br>17227-18663<br>2-1234 |
| <b>AAC6IF_1</b>                                                              | <b>Aminoglycoside Resistance</b> |                                  |                                    |
| amikacin<br>dibekacin<br>isepamicin<br>netilmicin<br>sisomicin<br>tobramycin | None                             | X55353                           | 279-710                            |
| <b>AAC6IG_2</b>                                                              | <b>Aminoglycoside Resistance</b> |                                  |                                    |
| amikacin<br>dibekacin<br>isepamicin<br>netilmicin<br>sisomicin<br>tobramycin | None                             | L09246<br>L29510                 | 544-978<br>369-803                 |
| <b>AAC6IIA_1</b>                                                             | <b>Aminoglycoside Resistance</b> |                                  |                                    |
| dibekacin<br>gentamicin<br>netilmicin<br>sisomicin<br>tobramycin             | None                             | AM29601                          | 7-2180-2731                        |
| <b>AAC6IIB_1</b>                                                             | <b>Aminoglycoside Resistance</b> |                                  |                                    |
| dibekacin<br>gentamicin<br>netilmicin<br>sisomicin<br>tobramycin             | None                             | L06163                           | 532-1071                           |
| <b>AAC6I_6</b>                                                               | <b>Aminoglycoside Resistance</b> |                                  |                                    |
| amikacin                                                                     | None                             | AF031327                         | 1-438                              |

| Resistance type | Required                                       | GenBank NO.     | Position        |
|-----------------|------------------------------------------------|-----------------|-----------------|
| dibekacin       |                                                | AF031328        | 1-438           |
| isepamicin      |                                                | AF031329        | 1-438           |
| netilmicin      |                                                | AF031330        | 1-438           |
| sisomicin       |                                                | AF031332        | 1-438           |
| tobramycin      |                                                | L29044          | 352-789         |
| <b>AAD9IB_5</b> | <b>Aminoglycoside Resistance</b>               |                 |                 |
| spectomycin     | None                                           | AB037671        | 53509-54009     |
| streptomycin    |                                                | AB047088        | 53229-53513     |
|                 |                                                | AJ579365        | 12533-13312     |
|                 |                                                | AP009324        | 10758-11537     |
|                 |                                                | EU146227        | 1764517-1765296 |
|                 |                                                |                 | 56823-57602     |
|                 |                                                | 1204-1983       |                 |
| <b>AAD9_2</b>   | <b>Aminoglycoside Resistance</b>               |                 |                 |
| spectomycin     | None                                           | AB042430        | 1706-2470       |
| streptomycin    |                                                | AB055650        | 3637-4401       |
| <b>AADD_4</b>   | <b>Aminoglycoside Resistance</b>               |                 |                 |
| kanamycin       | None                                           | AB037420        | 438-1196        |
| tobramycin      |                                                | AB121443        | 1-759           |
|                 |                                                | AF051917        | 21864-22622     |
|                 |                                                | EU437549        | 18789-19451     |
|                 |                                                | 18692-18784     |                 |
| <b>ACRA_30</b>  | <b>multidrug resistance transporters types</b> |                 |                 |
| acriflavin      | acrb                                           | AE005174        | 550497-551687   |
| aminoglycoside  | tolc                                           | AE008717        | 18273-19463     |
| beta_lactam     |                                                | AE014075        | 559079-560269   |
| glycylcycline   |                                                | AE014613        | 2454627-2455817 |
| macrolide       |                                                | AE017220        | 576791-577981   |
|                 |                                                | AJ306389        | 1430-2626       |
|                 |                                                | AJ318073        | 794-1987        |
|                 |                                                | AL627267        | 6284-7474       |
|                 |                                                | AM287286        | 1-1191          |
|                 |                                                | AM933172        | 511795-512985   |
|                 |                                                | AM933173        | 530258-531448   |
|                 |                                                | CP000026        | 2339847-2341037 |
|                 |                                                | CP000034        | 447726-448916   |
|                 |                                                | CP000243        | 498560-499750   |
|                 |                                                | CP000266        | 458611-459801   |
|                 |                                                | CP000647        | 487932-489122   |
|                 |                                                | CP000653        | 1048100-1049290 |
|                 |                                                | CP000783        | 2757972-2759174 |
|                 | CP000822                                       | 2492599-2493789 |                 |
|                 | CP000880                                       | 2381359-2382549 |                 |



| Resistance type | Required                                | GenBank NO. | Position         |
|-----------------|-----------------------------------------|-------------|------------------|
|                 |                                         | CP000886    | 2584794-2585984  |
|                 |                                         | CP000946    | 3455941-3457131  |
|                 |                                         | CP000964    | 4273130-4274320  |
|                 |                                         | CP001113    | 536819-538009    |
|                 |                                         | CP001120    | 579546-580736    |
|                 |                                         | CP001127    | 540551-541741    |
|                 |                                         | CP001138    | 513968-515158    |
|                 |                                         | CU928145    | 511740-512966    |
|                 |                                         | CU928158    | 2618823-2620049  |
|                 |                                         | CU928163    | 543145-544371    |
| ACRB_55         | multidrug resistance transporters types |             |                  |
| acriflavin      | tolc                                    | AB104882    | 1248-4400        |
| aminoglycoside  | acra                                    | AE005174    | 547325-550471    |
| beta_lactam     |                                         | AE005674    | 417788-420934    |
| glycylcycline   |                                         | AE008717    | 15101-18247-S-   |
| macrolide       |                                         | AE009952    | 1182424-1185573  |
|                 |                                         | AE014073    | 417589-420735    |
|                 |                                         | AE014075    | 555907-559053    |
|                 |                                         | AE014613    | 2455843-2458989  |
|                 |                                         | AE017220    | 573619-576765    |
|                 |                                         | AJ306389    | 2652-5795        |
|                 |                                         | AJ318073    | 2013-5156        |
|                 |                                         | AL590842    | 3492157-3495306  |
|                 |                                         | AL627267    | 3112-6258        |
|                 |                                         | AM286415    | 3374249-3377398- |
|                 |                                         | AM287287    | 1-3144           |
|                 |                                         | AM933172    | 508623-511769    |
|                 |                                         | AP008232    | 1156193-1159354  |
|                 |                                         | AP009048    | 480481-483627    |
|                 |                                         | AP009240    | 525087-528233    |
|                 |                                         | AY307102    | 3008-6151        |
|                 |                                         | BX950851    | 1322902-1326027  |
|                 |                                         | CP000026    | 2341063-2344209  |
|                 |                                         | CP000034    | 448942-452088    |
|                 |                                         | CP000036    | 374568-377714    |
|                 |                                         | CP000038    | 473451-476597    |
|                 |                                         | CP000243    | 495388-498534    |
|                 |                                         | CP000247    | 548499-551645    |
|                 |                                         | CP000468    | 496986-500132    |
|                 |                                         | CP000647    | 484763-487906    |
|                 |                                         | CP000653    | 1044928-1048074  |
|                 |                                         | CP000720    | 3454386-3457535  |
|                 |                                         | CP000783    | 2759199-2762345  |

| Resistance type | Required                                       | GenBank NO. | Position        |
|-----------------|------------------------------------------------|-------------|-----------------|
|                 |                                                | CP000800    | 516404-519550   |
|                 |                                                | CP000802    | 547322-550468   |
|                 |                                                | CP000822    | 2493815-2496955 |
|                 |                                                | CP000826    | 1237704-1240847 |
|                 |                                                | CP000880    | 2382575-2385718 |
|                 |                                                | CP000886    | 2586010-2589156 |
|                 |                                                | CP000946    | 3457157-3460303 |
|                 |                                                | CP000950    | 3508599-3511748 |
|                 |                                                | CP000964    | 4274346-4277489 |
|                 |                                                | CP000970    | 509570-512716   |
|                 |                                                | CP001063    | 379515-382661   |
|                 |                                                | CP001113    | 533647-536793   |
|                 |                                                | CP001120    | 576374-579520   |
|                 |                                                | CP001127    | 537379-540525   |
|                 |                                                | CP001138    | 510796-513942   |
|                 |                                                | CP001144    | 532566-535712   |
|                 |                                                | CU928145    | 508568-511714   |
|                 |                                                | CU928158    | 2620075-2623221 |
|                 |                                                | CU928160    | 496014-499160   |
|                 |                                                | CU928162    | 501991-505137   |
|                 |                                                | CU928163    | 39973-543119    |
|                 |                                                | DQ679966    | 1516-4659       |
|                 |                                                | FM180568    | 441734-444880   |
| <b>ADEA_3</b>   | <b>multidrug resistance transporters types</b> |             |                 |
| aminoglycoside  | adeb                                           | AF370885    | 3439-4626       |
| fluoramphenicol | adec                                           | CP000521    | 2039557-2040252 |
|                 |                                                | CP000863    | 2040254-2040745 |
|                 |                                                |             | 1951185-1952372 |
| <b>ADEB_5</b>   | <b>multidrug resistance transporters types</b> |             |                 |
| aminoglycoside  | adec                                           | AF370885    | 4629-7733       |
| chloramphenicol | adea                                           | CP000521    | 2036450-2039554 |
|                 |                                                | CP000863    | 1948078-1951182 |
|                 |                                                | CP001172    | 1830079-1833183 |
|                 |                                                | CP001182    | 2159258-2162362 |
| <b>ADEC_4</b>   | <b>multidrug resistance transporters types</b> |             |                 |
| aminoglycoside  | adeb                                           | AF370885    | 7813-9207       |
| chloramphenicol | adea                                           | CP000863    | 1946604-1947998 |
|                 |                                                | CP001172    | 1833263-1834657 |
|                 |                                                | CP001182    | 2157784-2159178 |
| <b>AMRA_9</b>   | <b>multidrug resistance transporters types</b> |             |                 |
| acriflavine     | amrb                                           | AF072887    | 737-1933        |
| aminoglycoside  | opra                                           | AM747720    | 1828820-1830019 |
| macrolide       |                                                | BX571965    | 2150969-2152165 |

| Resistance type  | Required                                       | GenBank NO. | Position        |
|------------------|------------------------------------------------|-------------|-----------------|
|                  |                                                | CP000086    | 2799291-2800487 |
|                  |                                                | CP000124    | 2222524-2223720 |
|                  |                                                | CP000378    | 1242074-1243273 |
|                  |                                                | CP000548    | 811519-812715   |
|                  |                                                | CP000572    | 1855788-1856984 |
|                  |                                                | CP000958    | 1765206-1766405 |
| <b>AMRB_8</b>    | <b>multidrug resistance transporters types</b> |             |                 |
| acriflavine      | amra                                           | AF072887    | 1953-5081       |
| aminoglycoside   | opra                                           | AM747720    | 1830038-1833175 |
| macrolide        |                                                | BX571965    | 2147821-2150949 |
|                  |                                                | CP000086    | 2796143-2799271 |
|                  |                                                | CP000378    | 1243292-1246429 |
|                  |                                                | CP000440    | 1669739-1672873 |
|                  |                                                | CP000958    | 1766424-1769561 |
|                  |                                                | CP001025    | 1715308-1718442 |
| <b>ANT2IA_23</b> | <b>Aminoglycoside Resistance</b>               |             |                 |
| dibekacin        | None                                           | AB113115    | 2-877           |
| n_gentamicin     |                                                | AB126602    | 2-874           |
| kanamycin        |                                                | AB186118    | 3-617           |
| sisomicin        |                                                | AB194701    | 2-895           |
| tobramycin       |                                                | AF047479    | 1080-2084       |
|                  |                                                | AF071555    | 1745-2749       |
|                  |                                                | AF164956    | 14764-15768     |
|                  |                                                | AF221903    | 2-895           |
|                  |                                                | AF364344    | 51-656          |
|                  |                                                | AF458082    | 509-1255        |
|                  |                                                | AF486817    | 342-1346        |
|                  |                                                | AF530636    | 2-895           |
|                  |                                                | AF530637    | 2-895           |
|                  |                                                | AJ704863    | 23056-23802     |
|                  |                                                | AY263740    | 2-895           |
|                  |                                                | AY522431    | 11873-12880     |
|                  |                                                | AY913771    | 71-817          |
|                  |                                                | CP000603    | 153876-154883   |
|                  |                                                | D43625      | 1080-2084       |
|                  |                                                | DQ778999    | 2-895           |
|                  |                                                | DQ789569    | 1-585           |
|                  |                                                | EU089667    | 7-2-874         |
|                  |                                                | FJ460178    | 1-876           |
| <b>ANT2IB_1</b>  | <b>Aminoglycoside Resistance</b>               |             |                 |
| dibekacin        | None                                           | L06161      | 106-942         |
| gentamicin       |                                                |             |                 |
| kanamycin        |                                                |             |                 |

| Resistance type          | Required                         | GenBank NO. | Position      |
|--------------------------|----------------------------------|-------------|---------------|
| sisomicin<br>tobramycin  |                                  |             |               |
| <b>ANT3IA_24</b>         | <b>Aminoglycoside Resistance</b> |             |               |
| spectinomycin            | None                             | AB086433    | 4807-5775     |
| streptomycin             |                                  | AB107663    | 2-877         |
|                          |                                  | AB126599    | 2-874         |
|                          |                                  | AB188259    | 2-895         |
|                          |                                  | AB219233    | 2-895         |
|                          |                                  | AB236930    | 824-1831      |
|                          |                                  | AB287976    | 2-877         |
|                          |                                  | AB294425    | 4692-5699     |
|                          |                                  | AJ496285    | 2-895         |
|                          |                                  | AM932671    | 2-895         |
|                          |                                  | AY139590    | 2-895         |
|                          |                                  | AY232671    | 333-1337      |
|                          |                                  | AY456904    | 2873-3880     |
|                          |                                  | AY677093    | 2-895         |
|                          |                                  | AY737283    | 9441-10409    |
|                          |                                  | CP000604    | 125888-126892 |
|                          |                                  | CP000645    | 91507-92511   |
|                          |                                  | DQ517526    | 96404-97408   |
|                          |                                  | DQ778998    | 2-895         |
|                          |                                  | DQ779003    | 2-895         |
|                          |                                  | EU089666    | 1-876         |
|                          |                                  | EU622040    | 1-975         |
|                          |                                  | U46780      | 403-1410      |
|                          |                                  | U66308      | 4914-5882     |
| <b>ANT4IIA_1</b>         | <b>Aminoglycoside Resistance</b> |             |               |
| amikacin                 | None                             | M98270      | 145-900       |
| isepamicin<br>tobramycin |                                  |             |               |
| <b>ANT6IA_3</b>          | <b>Aminoglycoside Resistance</b> |             |               |
| streptomycin             | None                             | AY345595    | 61137-62000   |
|                          |                                  | DQ519394    | 3686-4405     |
|                          |                                  | DQ519395    | 5609-6472     |
| <b>APH33IA_2</b>         | <b>Aminoglycoside Resistance</b> |             |               |
| streptomycin             | None                             | AP009493    | 267117-267932 |
|                          |                                  | M16482      | 501-1316      |
| <b>APH33IB_10</b>        | <b>Aminoglycoside Resistance</b> |             |               |
| streptomycin             | None                             | AB109805    | 1871-2671     |
|                          |                                  | AB114188    | 18570-19370   |
|                          |                                  | AB366440    | 83604-84404   |
|                          |                                  | AB450045    | 14254-15054   |

| Resistance type  | Required                         | GenBank NO. | Position        |
|------------------|----------------------------------|-------------|-----------------|
|                  |                                  | AF303375    | 965-1765        |
|                  |                                  | AJ830713    | 3831-4505       |
|                  |                                  | AY509004    | 51229-51909     |
|                  |                                  | CT025832    | 22312-23112     |
|                  |                                  | CU459141    | 3679659-3680459 |
|                  |                                  | DQ464881    | 2219-3016       |
| <b>APH3IA_58</b> | <b>Aminoglycoside Resistance</b> |             |                 |
| gentamincin_b    | None                             | AB019603    | 313-1125        |
| kanamycin        |                                  | AB020028    | 11245-12060     |
| lividomycin      |                                  | AB031077    | 3331-4143       |
| neomycin         |                                  | AB032348    | 2208-3020       |
| paromomycin      |                                  | AB095955    | 5063-5875       |
| ribostamycin     |                                  | AB107950    | 2463-3275       |
|                  |                                  | AB262967    | 6178-6990       |
|                  |                                  | AB277723    | 1315-2127       |
|                  |                                  | AB303314    | 373-1179        |
|                  |                                  | AB364151    | 1196-2002       |
|                  |                                  | AB366440    | 79146-79958     |
|                  |                                  | AF083408    | 162-974         |
|                  |                                  | AF116269    | 563-1375        |
|                  |                                  | AF191089    | 1-813           |
|                  |                                  | AF223640    | 1375-2175       |
|                  |                                  | AF306519    | 792-1604        |
|                  |                                  | AF498082    | 4217-5029       |
|                  |                                  | AF532106    | 200-1012        |
|                  |                                  | AJ007829    | 2097-2909       |
|                  |                                  | AJ271879    | 9443-10255      |
|                  |                                  | AJ308295    | 4466-5278       |
|                  |                                  | AJ606312    | 888-1700        |
|                  |                                  | AM179852    | 935-1747        |
|                  |                                  | AM884371    | 5980-6792       |
|                  |                                  | AP004237    | 117878-118690   |
|                  |                                  | AY033554    | 5314-6126       |
|                  |                                  | AY061891    | 167-979         |
|                  |                                  | AY178634    | 4798-5610       |
|                  |                                  | AY333433    | 2270-3082       |
|                  |                                  | AY339625    | 917-1729        |
|                  |                                  | AY597272    | 623-1435        |
|                  |                                  | AY619006    | 1163-1975       |
|                  |                                  | AY899293    | 1877-2626       |
|                  |                                  | AY944581    | 320-1132        |
|                  |                                  | D45833      | 479-1291        |
|                  |                                  | D45834      | 9580-10392      |

| Resistance type   | Required                         | GenBank NO. | Position    |
|-------------------|----------------------------------|-------------|-------------|
|                   |                                  | D63840      | 325-1137    |
|                   |                                  | DQ016035    | 1279-2091   |
|                   |                                  | DQ391279    | 10480-11292 |
|                   |                                  | DQ452049    | 6638-7450   |
|                   |                                  | EF015636    | 2433-3245   |
|                   |                                  | EF175995    | 1877-2689   |
|                   |                                  | EF392865    | 2015-2827   |
|                   |                                  | EF411199    | 1068-1874   |
|                   |                                  | EF488742    | 1421-2227   |
|                   |                                  | EU496093    | 149-961     |
|                   |                                  | EU496099    | 190-1002    |
|                   |                                  | EU499313    | 7326-8138   |
|                   |                                  | EU600162    | 595-1344    |
|                   |                                  | FJ160465    | 11068-11880 |
|                   |                                  | FM164773    | 4781-5593   |
|                   |                                  | L05392      | 6414-7226   |
|                   |                                  | L08776      | 1920-2732   |
|                   |                                  | L23118      | 3082-3894   |
|                   |                                  | M18327      | 2429-3241   |
|                   |                                  | U63147      | 185-997     |
|                   |                                  | U84737      | 997-1809    |
|                   |                                  | Y00452      | 106-918     |
| <b>APH3IB_1</b>   | <b>Aminoglycoside Resistance</b> |             |             |
| gentamycin_b      | None                             | AJ744860    | 42975-43787 |
| kanamycin         |                                  |             |             |
| lividomycin       |                                  |             |             |
| neomycin          |                                  |             |             |
| paromomycin       |                                  |             |             |
| ribostamycin      |                                  |             |             |
| <b>APH3IC_2</b>   | <b>Aminoglycoside Resistance</b> |             |             |
| gentamycin_b      | None                             | Z48231      | 820-1632    |
| kanamycin         |                                  | Z74787      | 6098-6910   |
| lividomycin       |                                  |             |             |
| neomycin          |                                  |             |             |
| paromomycin       |                                  |             |             |
| ribostamycin      |                                  |             |             |
| <b>APH3IIIA_5</b> | <b>Aminoglycoside Resistance</b> |             |             |
| amikacin          | None                             | AB246757    | 205-996     |
| butirosin         |                                  | AB247327    | 3096-3887   |
| gentamycin_b      |                                  | AB289764    | 13319-14110 |
| isepamicin        |                                  | FJ386489    | 2561-3352   |
| kanamycin         |                                  | M36771      | 293-1081    |
| lividomycin       |                                  |             |             |

| <b>Resistance type</b>                                                                                      | <b>Required</b>                  | <b>GenBank NO.</b>               | <b>Position</b>                         |
|-------------------------------------------------------------------------------------------------------------|----------------------------------|----------------------------------|-----------------------------------------|
| neomycin<br>paromomycin<br>ribostamycin                                                                     |                                  |                                  |                                         |
| <b>APH3IVA_1</b>                                                                                            | <b>Aminoglycoside Resistance</b> |                                  |                                         |
| butirosin<br>kanamycin<br>neomycin<br>paromomycin<br>ribostamycin                                           | None                             | X03364                           | 277-1062                                |
| <b>APH3VA_3</b>                                                                                             | <b>Aminoglycoside Resistance</b> |                                  |                                         |
| neomycin<br>paromomycin<br>ribostamycin                                                                     | None                             | AB211959<br>AJ786317<br>K00432   | 4000-4803<br>19707-20510<br>307-1110    |
| <b>APH3VB_2</b>                                                                                             | <b>Aminoglycoside Resistance</b> |                                  |                                         |
| neomycin<br>paromomycin<br>ribostamycin                                                                     | None                             | AJ744850<br>M22126               | 33603-34394<br>373-1161                 |
| <b>APH3VIA_3</b>                                                                                            | <b>Aminoglycoside Resistance</b> |                                  |                                         |
| amikacin<br>butirosin<br>gentamicin_b<br>isepamicin<br>kanamycin<br>neomycin<br>paromomycin<br>ribostamycin | None                             | AJ627643<br>DQ315788<br>EU977572 | 4934-5710<br>7472-8248<br>1-777         |
| <b>APH3VIA_1</b>                                                                                            | <b>Aminoglycoside Resistance</b> |                                  |                                         |
| kanamycin<br>neomycin                                                                                       | None                             | M29953                           | 296-1045                                |
| <b>APH4IB_2</b>                                                                                             | <b>Aminoglycoside Resistance</b> |                                  |                                         |
| hygromycin_b                                                                                                | None                             | AF025746<br>AJ431691             | 911-1906<br>1103-2098                   |
| <b>APH6IA_3</b>                                                                                             | <b>Aminoglycoside Resistance</b> |                                  |                                         |
| streptomycin                                                                                                | None                             | AJ862840<br>AP009493<br>AY971801 | 33893-34921<br>6940873-6941901<br>1-921 |
| <b>APH6IB_2</b>                                                                                             | <b>Aminoglycoside Resistance</b> |                                  |                                         |
| streptomycin                                                                                                | None                             | AJ006985<br>X05648               | 11789-12709<br>382-1302                 |
| <b>APH6IC_3</b>                                                                                             | <b>Aminoglycoside Resistance</b> |                                  |                                         |
| streptomycin                                                                                                | None                             | AB255435<br>AY037297<br>X64335   | 117696-118493<br>2709-3506<br>6602-7351 |

| Resistance type           | Required        | GenBank NO. | Position        |
|---------------------------|-----------------|-------------|-----------------|
| <b>APH6ID_6</b>           |                 |             |                 |
| Aminoglycoside Resistance |                 |             |                 |
| streptomycin              | None            | AB109805    | 2674-3507       |
|                           |                 | AB114188    | 17734-18567     |
|                           |                 | AF313472    | 16397-17230     |
|                           |                 | AJ3135222   | 2696-3529       |
|                           |                 | CT025832    | 23115-23948     |
|                           |                 | CU459141    | 3678823-3679656 |
| <b>ARNA_10</b>            |                 |             |                 |
| polymyxin                 | None            | AE005174    | 3168508-3170487 |
|                           |                 | AE014075    | 2654421-2656400 |
|                           |                 | CP000034    | 2250985-2252964 |
|                           |                 | CP000038    | 2443874-2445853 |
|                           |                 | CP000247    | 2404849-2406825 |
|                           |                 | CP000802    | 2408826-2410805 |
|                           |                 | CP000946    | 1526502-1528481 |
|                           |                 | CP000970    | 2457418-2459397 |
|                           |                 | CU928163    | 2671471-2673450 |
|                           |                 | CU928164    | 2487053-2489032 |
| <b>BACA_40</b>            |                 |             |                 |
| bacitracin                | None            | AE005174    | 4010156-4010974 |
|                           |                 | AE005674    | 3192420-3193238 |
|                           |                 | AE008847    | 12871-13653     |
|                           |                 | AE009952    | 3915320-3916135 |
|                           |                 | AE014075    | 3643906-3644724 |
|                           |                 | AE014613    | 3213602-3214384 |
|                           |                 | AE017042    | 3298428-3299243 |
|                           |                 | AE017220    | 3332681-3333463 |
|                           |                 | AM286415    | 4013301-4014116 |
|                           |                 | AM933172    | 3258560-3259342 |
|                           |                 | AP009048    | 3201969-3202787 |
|                           |                 | AP009240    | 3466063-3466881 |
|                           |                 | BA000007    | 3942841-3943659 |
|                           |                 | BX571872    | 142421-143236   |
|                           |                 | BX950851    | 4035707-4036522 |
|                           |                 | CP000026    | 3181065-3181847 |
|                           |                 | CP000034    | 3003411-3003995 |
|                           |                 | CP000038    | 3357543-3358361 |
|                           |                 | CP000247    | 3314998-3315816 |
|                           |                 | CP000647    | 3787710-3788528 |
| CP000653                  | 3769928-3770746 |             |                 |
| CP000783                  | 332878-333693   |             |                 |
| CP000800                  | 3532979-3533797 |             |                 |
| CP000822                  | 4116231-4117046 |             |                 |



| Resistance type    | Required                       | GenBank NO. | Position        |
|--------------------|--------------------------------|-------------|-----------------|
|                    |                                | CP000826    | 4761321-4762142 |
|                    |                                | CP000880    | 4339636-4340418 |
|                    |                                | CP000886    | 3330960-3331742 |
|                    |                                | CP000946    | 691777-692595   |
|                    |                                | CP000964    | 670380-671198   |
|                    |                                | CP000970    | 3428830-3429648 |
|                    |                                | CP001063    | 3243243-3244061 |
|                    |                                | CP001113    | 3359936-3360718 |
|                    |                                | CP001127    | 3278153-3278935 |
|                    |                                | CP001138    | 3293534-3294316 |
|                    |                                | CP001144    | 3417655-3418437 |
|                    |                                | CU928158    | 3072403-3073224 |
|                    |                                | CU928162    | 3652393-3653214 |
|                    |                                | CU928163    | 3658087-3658908 |
|                    |                                | CU928164    | 3707620-3708441 |
|                    |                                | FM180568    | 3487367-3488185 |
| <b>BCRA_4</b>      | <b>bacitracin efflux pump.</b> |             |                 |
| bacitracin         | None                           | AF007865    | 46313-47230     |
|                    |                                | CP000764    | 292097-293050   |
|                    |                                | DQ272494    | 46203-47120     |
|                    |                                | DQ390456    | 19491-20408     |
| <b>BCRC_2</b>      | <b>bacitracin efflux pump.</b> |             |                 |
| bacitracin         | None                           | AF007865    | 48081-48689     |
|                    |                                | DQ272494    | 47972-48580     |
| <b>BL1_ACC_7</b>   | <b>beta-lactamase types</b>    |             |                 |
| cephalosporin      | None                           | AF180952    | 1565-2734       |
| e_penicillin       |                                | AF180953    | 1-1170          |
|                    |                                | AF180954    | 1-1170          |
|                    |                                | AF180959    | 1-1170          |
|                    |                                | AF180961    | 1-1170          |
|                    |                                | AJ133121    | 638-1807        |
|                    |                                | AJ270942    | 2627-3796       |
| <b>BL1_AMPC_39</b> | <b>beta-lactamase types</b>    |             |                 |
| cephalosporin      | None                           | AB016611    | 104-1246        |
|                    |                                | AF411144    | 14-1156         |
|                    |                                | AF411145    | 14-1156         |
|                    |                                | AF411146    | 14-1156         |
|                    |                                | AF411148    | 14-1156         |
|                    |                                | AF492446    | 962-2104        |
|                    |                                | AJ005633    | 44-1186         |
|                    |                                | AJ278994    | 1075-2199       |
|                    |                                | AJ278995    | 1075-2217       |
|                    |                                | AJ311172    | 9-1151          |

| <b>Resistance type</b> | <b>Required</b>             | <b>GenBank NO.</b> | <b>Position</b> |
|------------------------|-----------------------------|--------------------|-----------------|
|                        |                             | AJ311364           | 12-1154         |
|                        |                             | AM076977           | 1-1143          |
|                        |                             | AY125471           | 1021-2163       |
|                        |                             | AY227752           | 89-1231         |
|                        |                             | AY302261           | 1-1143          |
|                        |                             | AY536040           | 1-1143          |
|                        |                             | AY743435           | 14-1156         |
|                        |                             | D44479             | 390-1541        |
|                        |                             | DQ478697           | 1006-2148       |
|                        |                             | DQ478700           | 1-1134          |
|                        |                             | DQ478702           | 1-1143          |
|                        |                             | DQ478705           | 1-1113          |
|                        |                             | DQ478710           | 1-1143          |
|                        |                             | DQ478723           | 1009-2151       |
|                        |                             | DQ478725           | 1009-2151       |
|                        |                             | DQ986958           | 1-1101          |
|                        |                             | EF125013           | 1-1143          |
|                        |                             | EF125014           | 1-1140          |
|                        |                             | EF417572           | 30-1172         |
|                        |                             | EF508682           | 1-1104          |
|                        |                             | FJ237366           | 38-1180         |
|                        |                             | FJ237367           | 1-1143          |
|                        |                             | FJ237368           | 1-1143          |
|                        |                             | FJ237369           | 1-1143          |
|                        |                             | M37839             | 928-2070        |
|                        |                             | U58495             | 28-1170         |
|                        |                             | X07274             | 44-1186         |
|                        |                             | X08081             | 3-1127          |
|                        |                             | X08082             | 44-1186         |
| <b>BL1_ASBA_1</b>      | <b>beta-lactamase types</b> |                    |                 |
| cephalosporin          | None                        | U10250             | 181-1326        |
| <b>BL1_CEPS_4</b>      | <b>beta-lactamase types</b> |                    |                 |
| cephalosporin          | None                        | AC167966           | 76474-77619     |
|                        |                             | AJ276030           | 2671-3816       |
|                        |                             | CP000462           | 3545773-3547041 |
|                        |                             | X80277             | 1-1146          |
| <b>BL1_CMY2_54</b>     | <b>beta-lactamase types</b> |                    |                 |
| carbapenem             | None                        | AB107899           | 1008-2150       |
| cefoxitin              |                             | AB212085           | 1-1143          |
| ceftazidime            |                             | AB280919           | 1-1143          |
| ceftriaxone            |                             | AB300358           | 1-1143          |
| cephalosporin          |                             | AB372224           | 1-1143          |
| cephamycin             |                             | AB429270           | 15-1157         |

| <b>Resistance type</b> | <b>Required</b> | <b>GenBank NO.</b> | <b>Position</b> |
|------------------------|-----------------|--------------------|-----------------|
|                        |                 | AF349569           | 1-1143          |
|                        |                 | AF349570           | 1-1143          |
|                        |                 | AF492445           | 420-1562        |
|                        |                 | AF492447           | 539-1681        |
|                        |                 | AF492448           | 538-1680        |
|                        |                 | AJ011291           | 1-1143          |
|                        |                 | AJ555823           | 1-1143          |
|                        |                 | AJ555825           | 1-1143          |
|                        |                 | AJ607409           | 1492-2634       |
|                        |                 | AJ746169           | 1-1143          |
|                        |                 | AJ781421           | 1-1143          |
|                        |                 | AM77974            | 1-1143          |
|                        |                 | AY125469           | 1059-2201       |
|                        |                 | AY339625           | 3644-4786       |
|                        |                 | AY513266           | 165-1307        |
|                        |                 | AY743434           | 47-1195         |
|                        |                 | AY960293           | 1-1140          |
|                        |                 | CP000604           | 72367-73509     |
|                        |                 | D13207             | 143-1285        |
|                        |                 | D85910             | 587-1729        |
|                        |                 | DQ017661           | 9315-10457      |
|                        |                 | DQ256079           | 1-1143          |
|                        |                 | DQ438952           | 161-1303        |
|                        |                 | DQ443436           | 1-1143          |
|                        |                 | DQ663490           | 10-1110         |
|                        |                 | EF394370           | 1-1143          |
|                        |                 | EF394371           | 1-1143          |
|                        |                 | EF426097           | 1-1143          |
|                        |                 | EF561644           | 1-1143          |
|                        |                 | EF622224           | 1-1143          |
|                        |                 | EF685371           | 1-1143          |
|                        |                 | EU113222           | 20-1162         |
|                        |                 | EU331426           | 2375-3517       |
|                        |                 | EU496815           | 1-1143          |
|                        |                 | EU496816           | 1-1137          |
|                        |                 | EU515249           | 1-1143          |
|                        |                 | EU515250           | 1-1143          |
|                        |                 | EU515251           | 1-1143          |
|                        |                 | FJ360626           | 1-1143          |
|                        |                 | FJ437066           | 1-1131          |
|                        |                 | U77414             | -1-1143         |
|                        |                 | X03866             | 43-1185         |
|                        |                 | X51632             | 143-1285        |

| Resistance type  | Required                    | GenBank NO. | Position        |
|------------------|-----------------------------|-------------|-----------------|
|                  |                             | X74512      | 127-1269        |
|                  |                             | X78117      | 142-1284        |
|                  |                             | Y15411      | 1-1143          |
|                  |                             | Y15412      | 1-1143          |
|                  |                             | Y16785      | 1-1143          |
| <b>BL1_EC_51</b> | <b>beta-lactamase types</b> |             |                 |
| cephalosporin    | None                        | AB108683    | 1-1122          |
|                  |                             | AE005174    | 5262079-5263209 |
|                  |                             | AE005674    | 4482201-4483331 |
|                  |                             | AE014075    | 4986535-4987665 |
|                  |                             | AF124201    | 180-1310        |
|                  |                             | AF124202    | 180-1310        |
|                  |                             | AF124203    | 180-1310        |
|                  |                             | AF492449    | 176-1306        |
|                  |                             | AP009048    | 4382494-4383624 |
|                  |                             | AP009240    | 4649872-4651002 |
|                  |                             | AY533244    | 194-1324        |
|                  |                             | AY533245    | 221-1351        |
|                  |                             | AY843211    | 83-1213         |
|                  |                             | AY899338    | 110-1240        |
|                  |                             | CP000034    | 4111754-4112884 |
|                  |                             | CP000036    | 4355147-4356277 |
|                  |                             | CP000038    | 4604319-4605449 |
|                  |                             | CP000243    | 4649613-4650743 |
|                  |                             | CP000247    | 4607987-4609117 |
|                  |                             | CP000266    | 4450795-4451925 |
|                  |                             | CP000800    | 4710494-4711624 |
|                  |                             | CP000946    | 4218132-4219262 |
|                  |                             | CP000970    | 4722463-4723593 |
|                  |                             | CP001063    | 4374305-4375435 |
|                  |                             | CU928158    | 4310555-4311685 |
|                  |                             | CU928162    | 4896149-4897279 |
|                  |                             | CU928163    | 4863059-4864189 |
|                  |                             | DQ022104    | 1-1131          |
|                  |                             | DQ023607    | 1-1131          |
|                  |                             | DQ091197    | 185-1315        |
|                  |                             | DQ092421    | 185-1315        |
|                  |                             | DQ092423    | 185-1315        |
|                  |                             | DQ092426    | 185-1315        |
|                  |                             | DQ092427    | 185-1315        |
|                  |                             | DQ092428    | 185-1315        |
|                  |                             | DQ092429    | 185-1315        |
|                  |                             | DQ092430    | 185-1315        |

| Resistance type   | Required                    | GenBank NO. | Position        |
|-------------------|-----------------------------|-------------|-----------------|
|                   |                             | DQ092431    | 185-1315        |
|                   |                             | DQ092433    | 185-1315        |
|                   |                             | DQ092434    | 185-1315        |
|                   |                             | DQ432011    | 169-1299        |
|                   |                             | DQ821475    | 678-1283        |
|                   |                             | DQ821476    | 189-1271        |
|                   |                             | DQ821477    | 154-1287        |
|                   |                             | DQ821478    | 154-1284        |
|                   |                             | EF125541    | 144-1280        |
|                   |                             | EF507687    | 1-1131          |
|                   |                             | EF661829    | 171-1304        |
|                   |                             | FJ439686    | 175-1305        |
|                   |                             | FM180568    | 4725641-4726771 |
|                   |                             | J01611      | 4156-5286       |
| <b>BL1_FOX_7</b>  | <b>beta-lactamase types</b> |             |                 |
| cephalosporin     | None                        | AF462690    | 673-1818        |
|                   |                             | AJ2775351   | 1146            |
|                   |                             | AY007369    | 1146            |
|                   |                             | CP000644    | 1230984-1232213 |
|                   |                             | X77455      | 701-1846        |
|                   |                             | Y10282      | 19-1164         |
|                   |                             | Y11068      | 17-1162         |
| <b>BL1_MOX_1</b>  | <b>beta-lactamase types</b> |             |                 |
| cephalosporin     | None                        | AB061794    | 6018-7163       |
| <b>BL1_OCH_4</b>  | <b>beta-lactamase types</b> |             |                 |
| cephalosporin     | None                        | AJ295340    | 1-1170          |
|                   |                             | AJ295341    | 1-1170          |
|                   |                             | AJ295343    | 1-1170          |
|                   |                             | CP000758    | 2711705-2712874 |
| <b>BL1_PAO_11</b> | <b>beta-lactamase types</b> |             |                 |
| cephalosporin     | None                        | AB198756    | 1-1191          |
|                   |                             | AB211125    | 1-1191          |
|                   |                             | AB211126    | 1-1191          |
|                   |                             | AE004091    | 4594029-4595219 |
|                   |                             | AF490770    | 45-1235         |
|                   |                             | AY083592    | 45-1235         |
|                   |                             | AY083593    | 40-1230         |
|                   |                             | AY083594    | 2-1165          |
|                   |                             | CP000438    | 932634-933824   |
|                   |                             | CP000744    | 987340-988530   |
|                   |                             | FM209186    | 940034-941224   |
| <b>BL1_PSE_1</b>  | <b>beta-lactamase types</b> |             |                 |
| cephalosporin     | None                        | CP000076    | 4666561-4667730 |

| <b>Resistance type</b> | <b>Required</b>             | <b>GenBank NO.</b> | <b>Position</b> |
|------------------------|-----------------------------|--------------------|-----------------|
| <b>BL1_SM_12</b>       | <b>beta-lactamase types</b> |                    |                 |
| cephalosporin          | None                        | AB008454           | 154-1287        |
|                        |                             | AB008455           | 152-1285        |
|                        |                             | AF327324           | 33-1166         |
|                        |                             | AF384203           | 65-1198         |
|                        |                             | AJ271368           | 1586-2716       |
|                        |                             | AY336102           | 1-1122          |
|                        |                             | AY524276           | 1-1134          |
|                        |                             | AY538705           | 1-1113          |
|                        |                             | AY954692           | 1-1083          |
|                        |                             | DQ184903           | 1-1134          |
|                        |                             | DQ308562           | 1-1134          |
|                        |                             | X52964             | 24-1151         |
| <b>BL2A_1_12</b>       | <b>beta-lactamase types</b> |                    |                 |
| penicillin             | None                        | AE016877           | 3401941-3402732 |
|                        |                             | AE016879           | 3216835-3217602 |
|                        |                             | AE017194           | 3216717-3217487 |
|                        |                             | AE017355           | 3289355-3290122 |
|                        |                             | AF367984           | 791-1558        |
|                        |                             | CP000485           | 3283236-3284024 |
|                        |                             | CP001176           | 3332636-3333397 |
|                        |                             | CP001177           | 3230727-3231494 |
|                        |                             | CP001283           | 3296753-3297520 |
|                        |                             | M11189             | 330-1010        |
|                        |                             | M15350             | 135-905         |
|                        |                             | M19530             | 416-1183        |
| <b>BL2A_EXO_1</b>      | <b>beta-lactamase types</b> |                    |                 |
| penicillin             | None                        | M28303             | 243-1184        |
| <b>BL2A_III2_2</b>     | <b>beta-lactamase types</b> |                    |                 |
| penicillin             | None                        | AE017333           | 254017-254937   |
|                        |                             | V00093             | 266-1186        |
| <b>BL2A_III_8</b>      | <b>beta-lactamase types</b> |                    |                 |
| penicillin             | None                        | AE016877           | 2443996-2444913 |
|                        |                             | CP000903           | 2398002-2399045 |
|                        |                             | CP001176           | 2423800-2424717 |
|                        |                             | CP001186           | 2387711-2388628 |
|                        |                             | X01602             | 273-1181        |
|                        |                             | X06599             | 273-1190        |
|                        |                             | X62244             | 143-1060        |
|                        |                             | X83424             | 253-1188        |
| <b>BL2A_KCC_1</b>      | <b>beta-lactamase types</b> |                    |                 |
| penicillin             | None                        | D12653             | 747-1679        |
| <b>BL2A_NPS_1</b>      | <b>beta-lactamase types</b> |                    |                 |

| <b>Resistance type</b> | <b>Required</b>             | <b>GenBank NO.</b> | <b>Position</b> |
|------------------------|-----------------------------|--------------------|-----------------|
| penicillin             | None                        | X15791             | 1376-2254       |
| <b>BL2A_OKP_29</b>     | <b>beta-lactamase types</b> |                    |                 |
| penicillin             | None                        | AJ635402           | 1-858           |
|                        |                             | AJ635404           | 1-858           |
|                        |                             | AM051140           | 1-858           |
|                        |                             | AM051142           | 1-858           |
|                        |                             | AM051143           | 1-858           |
|                        |                             | AM051147           | 1-858           |
|                        |                             | AM051151           | 1-858           |
|                        |                             | AM051152           | 1-858           |
|                        |                             | AM051153           | 1-858           |
|                        |                             | AM051156           | 1-858           |
|                        |                             | AM051157           | 1-858           |
|                        |                             | AM051159           | 1-858           |
|                        |                             | AM051160           | 1-858           |
|                        |                             | AM051161           | 1-858           |
|                        |                             | AM850916           | 19-876          |
|                        |                             | AM850917           | 18-875          |
|                        |                             | AM850918           | 25-882          |
|                        |                             | AM850919           | 25-882          |
|                        |                             | AM850920           | 41-898          |
|                        |                             | AM850921           | 25-882          |
|                        |                             | AM850922           | 25-882          |
|                        |                             | AY512506           | 68-925          |
|                        |                             | AY825330           | 1-858           |
|                        |                             | AY850171           | 68-925          |
|                        |                             | DQ149135           | 47-904          |
|                        |                             | DQ149136           | 47-904          |
|                        |                             | DQ149137           | 47-904          |
|                        |                             | DQ149138           | 47-904          |
|                        |                             | DQ995288           | 3-827           |
| <b>BL2A_PC_16</b>      | <b>beta-lactamase types</b> |                    |                 |
| penicillin             | None                        | AB179623           | 10165-10935     |
|                        |                             | AB245468           | 2307-3077       |
|                        |                             | AB255366           | 7719-8489       |
|                        |                             | AE015929           | 1664208-1665050 |
|                        |                             | AF128883           | 780-1622        |
|                        |                             | AJ302698           | 2067-2837       |
|                        |                             | AP004832           | 10343-11113     |
|                        |                             | AY373761           | 16143-16913     |
|                        |                             | CP000029           | 1526929-1527771 |
|                        |                             | CP000732           | 9686-10528      |
|                        |                             | DQ016057           | 375-1163        |

| Resistance type      | Required                    | GenBank NO. | Position    |
|----------------------|-----------------------------|-------------|-------------|
|                      |                             | DQ269019    | 78-848      |
|                      |                             | DQ919081    | 1-792       |
|                      |                             | DQ919089    | 2-799       |
|                      |                             | M25254      | 211-981     |
|                      |                             | U43087      | 7-810       |
| <b>BL2BE_CTXM_59</b> | <b>beta-lactamase types</b> |             |             |
| ceftazidime          | None                        | AB059404    | 85-873      |
| cephalosporin_i      |                             | AB176532    | 88-873      |
| cephalosporin_ii     |                             | AB176535    | 88-873      |
| cephalosporin_iii    |                             | AB177384    | 85-873      |
| monobactam           |                             | AB185842    | 85-873      |
| penicillin           |                             | AB205197    | 4-873       |
|                      |                             | AB284167    | 226-1098    |
|                      |                             | AF189721    | 274-1146    |
|                      |                             | AF255298    | 85-873      |
|                      |                             | AF286192    | 1076-1858   |
|                      |                             | AF305837    | 85-873      |
|                      |                             | AF462634    | 34-759      |
|                      |                             | AF501233    | 534-1403    |
|                      |                             | AF518567    | 2321-3193   |
|                      |                             | AJ005044    | 88-873      |
|                      |                             | AJ005045    | 88-873      |
|                      |                             | AJ272538    | 3065-3850   |
|                      |                             | AJ310929    | 328-1116    |
|                      |                             | AJ427463    | 91-873      |
|                      |                             | AJ427466    | 88-873      |
|                      |                             | AJ427468    | 88-873      |
|                      |                             | AJ549244    | 85-873      |
|                      |                             | AJ567481    | 88-873      |
|                      |                             | AJ704396    | 85-873      |
|                      |                             | AM411407    | 85-873      |
|                      |                             | AM982520    | 5639-6421   |
|                      |                             | AM982521    | 2002-2784   |
|                      |                             | AM982522    | 1-873       |
|                      |                             | AY005110    | 85-846      |
|                      |                             | AY026417    | 2428-3300   |
|                      |                             | AY157676    | 1-873       |
|                      |                             | AY238472    | 16-804      |
|                      |                             | AY267213    | 85-873      |
|                      |                             | AY292654    | 85-873      |
|                      |                             | AY421962    | 87-875      |
|                      |                             | AY458016    | 20356-21144 |
|                      |                             | AY575772    | 111-899     |



| Resistance type      | Required                    | GenBank NO. | Position      |
|----------------------|-----------------------------|-------------|---------------|
|                      |                             | AY649755    | 102-890       |
|                      |                             | AY753197    | 85-873        |
|                      |                             | AY835399    | 73-828        |
|                      |                             | AY954516    | 1-873         |
|                      |                             | DQ023162    | 1-873         |
|                      |                             | DQ102702    | 88-873        |
|                      |                             | DQ223685    | 85-873        |
|                      |                             | DQ256091    | 183-971       |
|                      |                             | DQ268764    | 5976-6764     |
|                      |                             | DQ408762    | 88-873        |
|                      |                             | DQ810789    | 312-1100      |
|                      |                             | EF382672    | 222197-222985 |
|                      |                             | EU082208    | 85-873        |
|                      |                             | EU118591    | 28-753        |
|                      |                             | EU118594    | 53-802        |
|                      |                             | EU176817    | 51-788        |
|                      |                             | EU177100    | 89-877        |
|                      |                             | EU376964    | 85-873        |
|                      |                             | EU402393    | 85-873        |
|                      |                             | Y14156      | 88-873        |
|                      |                             | AF473577    | 265-1053      |
|                      |                             | AJ427467    | 91-873        |
| <b>BL2BE_OXY1_14</b> | <b>beta-lactamase types</b> |             |               |
| monobactam           | None                        | AF473577    | 265-1053      |
| penicillin           |                             | AJ871864    | 1-873         |
|                      |                             | AJ871868    | 1-870         |
|                      |                             | AJ871871    | 1-870         |
|                      |                             | AJ871873    | 1-873         |
|                      |                             | AJ871875    | 1-870         |
|                      |                             | AJ871876    | 1-873         |
|                      |                             | AJ871877    | 1-873         |
|                      |                             | AY077481    | 186-1055      |
|                      |                             | AY077482    | 162-1034      |
|                      |                             | AY077483    | 183-1052      |
|                      |                             | AY077486    | 181-1053      |
|                      |                             | M27459      | 86-958        |
|                      |                             | Y17715      | 147-1019      |
| <b>BL2BE_PER_6</b>   | <b>beta-lactamase types</b> |             |               |
| e_cephalosporin      | None                        | AJ621265    | 530-1453      |
| monobactam           |                             | AM409516    | 1405-2328     |
| n_cephalosporin      |                             | DQ489436    | 20-862        |
| penicillin           |                             | DQ489437    | 2-793         |
|                      |                             | EU022369    | 3-923         |

| Resistance type | Required             | GenBank NO. | Position    |
|-----------------|----------------------|-------------|-------------|
|                 |                      | Z21957      | 288-1211    |
| BL2BE_SHV2_136  | beta-lactamase types |             |             |
| e_cephalosporin | None                 | AB023477    | 1-858       |
| monobactam      |                      | AB302939    | 9-866       |
| n_cephalosporin |                      | AB372881    | 9-866       |
| penicillin      |                      | AB374988    | 9-866       |
|                 |                      | AF072684    | 118-990     |
|                 |                      | AF074954    | 267-1124    |
|                 |                      | AF096930    | 1436-2293   |
|                 |                      | AF124984    | 199-1056    |
|                 |                      | AF132290    | 88-945      |
|                 |                      | AF148851    | 6-863       |
|                 |                      | AF164577    | 1-858       |
|                 |                      | AF208796    | 1-858       |
|                 |                      | AF226622    | 55-912      |
|                 |                      | AF299299    | 1-858       |
|                 |                      | AF301532    | 8-865       |
|                 |                      | AF462394    | 1-858       |
|                 |                      | AF462395    | 1-858       |
|                 |                      | AF462396    | 1-858       |
|                 |                      | AF467947    | 1-858       |
|                 |                      | AF467948    | 1-858       |
|                 |                      | AF535128    | 1-858       |
|                 |                      | AF535129    | 1-858       |
|                 |                      | AF535130    | 1-858       |
|                 |                      | AF538324    | 1-858       |
|                 |                      | AF547625    | 1-858       |
|                 |                      | AF550679    | 91052-91909 |
|                 |                      | AJ011428    | 1-858       |
|                 |                      | AJ866284    | 1-858       |
|                 |                      | AJ866285    | 1-858       |
|                 |                      | AM087453    | 26-856      |
|                 |                      | AM176546    | 1-858       |
|                 |                      | AM176547    | 31-888      |
|                 |                      | AM176548    | 23-871      |
|                 |                      | AM176549    | 31-888      |
|                 |                      | AM176550    | 31-888      |
|                 |                      | AM176551    | 31-888      |
|                 |                      | AM176552    | 31-888      |
|                 |                      | AM176553    | 31-888      |
|                 |                      | AM176554    | 31-888      |
|                 |                      | AM176555    | 1-858       |
|                 |                      | AM176556    | 26-883      |

| <b>Resistance type</b> | <b>Required</b> | <b>GenBank NO.</b> | <b>Position</b> |
|------------------------|-----------------|--------------------|-----------------|
|                        |                 | AM176557           | 1-858           |
|                        |                 | AM176558           | 4-858           |
|                        |                 | AM922304           | 1-858           |
|                        |                 | AM922305           | 1-858           |
|                        |                 | AM922306           | 1-897           |
|                        |                 | AM922308           | 1-858           |
|                        |                 | AM922309           | 1-858           |
|                        |                 | AY036620           | 89-946          |
|                        |                 | AY037778           | 92-949          |
|                        |                 | AY037779           | 89-946          |
|                        |                 | AY065991           | 7-864           |
|                        |                 | AY070258           | 1-858           |
|                        |                 | AY079099           | 149-1006        |
|                        |                 | AY210887           | 112-969         |
|                        |                 | AY259119           | 117-974         |
|                        |                 | AY259164           | 1-858           |
|                        |                 | AY263404           | 1-858           |
|                        |                 | AY277255           | 67-924          |
|                        |                 | AY288915           | 1-858           |
|                        |                 | AY289548           | 1-858           |
|                        |                 | AY293069           | 1-858           |
|                        |                 | AY352599           | 1-858           |
|                        |                 | AY386366           | 1-858           |
|                        |                 | AY502000           | 1-858           |
|                        |                 | AY502001           | 1-855           |
|                        |                 | AY502002           | 1-855           |
|                        |                 | AY502004           | 1-858           |
|                        |                 | AY504816           | 1-858           |
|                        |                 | AY509129           | 1-852           |
|                        |                 | AY518560           | 1218-2075       |
|                        |                 | AY528717           | 575-1432        |
|                        |                 | AY528718           | 414-1271        |
|                        |                 | AY570953           | 1-858           |
|                        |                 | AY677211           | 1-858           |
|                        |                 | AY737250           | 1-858           |
|                        |                 | AY787643           | 1-858           |
|                        |                 | AY790341           | 1-858           |
|                        |                 | AY826416           | 1-858           |
|                        |                 | CP000603           | 141583-142440   |
|                        |                 | CP000647           | 1784147-1785004 |
|                        |                 | DQ013287           | 1-858           |
|                        |                 | DQ166781           | 1-858           |
|                        |                 | DQ166783           | 1-858           |

| <b>Resistance type</b> | <b>Required</b> | <b>GenBank NO.</b> | <b>Position</b> |
|------------------------|-----------------|--------------------|-----------------|
|                        |                 | DQ174304           | 5-862           |
|                        |                 | DQ174305           | 5-862           |
|                        |                 | DQ174306           | 5-862           |
|                        |                 | DQ174307           | 5-862           |
|                        |                 | DQ174308           | 5-862           |
|                        |                 | DQ193536           | 1-858           |
|                        |                 | DQ219472           | 1-858           |
|                        |                 | DQ219473           | 1-858           |
|                        |                 | DQ219474           | 1-858           |
|                        |                 | DQ219475           | 1-858           |
|                        |                 | DQ219476           | 1-858           |
|                        |                 | DQ219477           | 1-858           |
|                        |                 | DQ219478           | 63-857          |
|                        |                 | DQ296194           | 1-858           |
|                        |                 | DQ322460           | 16-873          |
|                        |                 | DQ328802           | 1-858           |
|                        |                 | DQ355784           | 1-858           |
|                        |                 | DQ449578           | 80990-81847     |
|                        |                 | DQ478693           | 2-814           |
|                        |                 | DQ478728           | 13-843          |
|                        |                 | DQ836922           | 1-858           |
|                        |                 | DQ849331           | 1-858           |
|                        |                 | EF035557           | 1-858           |
|                        |                 | EF035563           | 1-858           |
|                        |                 | EF035567           | 1-858           |
|                        |                 | EF373969           | 1-858           |
|                        |                 | EF373970           | 1-858           |
|                        |                 | EF373971           | 1-858           |
|                        |                 | EF373972           | 1-858           |
|                        |                 | EF373973           | 1-858           |
|                        |                 | EF373974           | 1-858           |
|                        |                 | EF373975           | 1-858           |
|                        |                 | EF653399           | 353-1210        |
|                        |                 | EU024485           | 1-858           |
|                        |                 | EU032604           | 1-858           |
|                        |                 | EU155018           | 1-858           |
|                        |                 | EU155390           | 15-809          |
|                        |                 | EU274581           | 1-858           |
|                        |                 | EU342351           | 173-1030        |
|                        |                 | EU350512           | 1-849           |
|                        |                 | EU441172           | 57-914          |
|                        |                 | EU586041           | 1-858           |
|                        |                 | FJ194944           | 47-904          |

| Resistance type                                   | Required                    | GenBank NO.                                                          | Position                                                            |
|---------------------------------------------------|-----------------------------|----------------------------------------------------------------------|---------------------------------------------------------------------|
|                                                   |                             | L47119                                                               | 223-1080                                                            |
|                                                   |                             | M59181                                                               | 125-985                                                             |
|                                                   |                             | S82452                                                               | 121-975                                                             |
|                                                   |                             | U20270                                                               | 125-982                                                             |
|                                                   |                             | U92041                                                               | 1-858                                                               |
|                                                   |                             | X62115                                                               | 1281-2138                                                           |
|                                                   |                             | X98098                                                               | 74-931                                                              |
|                                                   |                             | X98100                                                               | 74-931                                                              |
|                                                   |                             | X98102                                                               | 74-931                                                              |
| <b>BL2B_ROB_2</b>                                 | <b>beta-lactamase types</b> |                                                                      |                                                                     |
| cephalosporin<br>penicillin                       | None                        | CP001094                                                             | 2779-3693                                                           |
| <b>BL2B_TEM1_6</b>                                | <b>beta-lactamase types</b> |                                                                      |                                                                     |
| cephalosporin_i<br>cephalosporin_ii<br>penicillin | None                        | AB005475<br>AB013921<br>AF427133<br>AF516720<br>AM901564<br>DQ849325 | 3144-4001<br>940-1797<br>209-1066<br>215-1072<br>1631-2488<br>1-858 |
| <b>BL2B_TEM2_1</b>                                | <b>beta-lactamase types</b> |                                                                      |                                                                     |
| cephalosporin_i<br>cephalosporin_ii<br>penicillin | None                        | AJ251946                                                             | 520-1377                                                            |
| <b>BL2B_TEM_2</b>                                 | <b>beta-lactamase types</b> |                                                                      |                                                                     |
| cephalosporin<br>penicillin                       | None                        | AF468003<br>Y14574                                                   | 1-858<br>1-858                                                      |
| <b>BL2B_TLE_1</b>                                 | <b>beta-lactamase types</b> |                                                                      |                                                                     |
| cephalosporin<br>penicillin                       | None                        | L25634                                                               | 1274-2155                                                           |
| <b>BL2B_ULA_2</b>                                 | <b>beta-lactamase types</b> |                                                                      |                                                                     |
| cephalosporin<br>penicillin                       | None                        | AF321608<br>X62610                                                   | 1-885<br>166-1047                                                   |
| <b>BL2C_BRO_1</b>                                 | <b>beta-lactamase types</b> |                                                                      |                                                                     |
| carbenicillin<br>penicillin                       | None                        | AF135373                                                             | 12-905                                                              |
| <b>BL2C_PSE1_2</b>                                | <b>beta-lactamase types</b> |                                                                      |                                                                     |
| carbenicillin<br>penicillin                       | None                        | AB126603<br>AF030945                                                 | 150-1061<br>48-959                                                  |
| <b>BL2C_PSE3_1</b>                                | <b>beta-lactamase types</b> |                                                                      |                                                                     |
| carbenicillin<br>penicillin                       | None                        | AJ877225                                                             | 43233-44111                                                         |
| <b>BL2D_LCR1_2</b>                                | <b>beta-lactamase types</b> |                                                                      |                                                                     |
| cloxacillin                                       | None                        | AJ431260                                                             | 57504-58283                                                         |

| <b>Resistance type</b> | <b>Required</b>             | <b>GenBank NO.</b> | <b>Position</b> |
|------------------------|-----------------------------|--------------------|-----------------|
| penicillin             |                             | L36547             | 7549-8328       |
| <b>BL2D_MOXA_1</b>     | <b>beta-lactamase types</b> |                    |                 |
| cloxacillin            | None                        | D90201             | 267-1175        |
| penicillin             |                             |                    |                 |
| <b>BL2D_OXA10_17</b>   | <b>beta-lactamase types</b> |                    |                 |
| cloxacillin            | None                        | AF043100           | 2-772           |
| penicillin             |                             | AF043381           | 944-1741        |
|                        |                             | AF043558           | 1-798           |
|                        |                             | AF060206           | 2-772           |
|                        |                             | AF231133           | 1346-2143       |
|                        |                             | AF300984           | 1-687           |
|                        |                             | AF315786           | 1314-2111       |
|                        |                             | AJ854182           | 1-798           |
|                        |                             | AM412777           | 118-915         |
|                        |                             | AY445080           | 1-798           |
|                        |                             | AY509609           | 207-1004        |
|                        |                             | CU459141           | 3656880-3657677 |
|                        |                             | EF437948           | 1-792           |
|                        |                             | EU708817           | 2161-2958       |
|                        |                             | FM877487           | 1343-2140       |
|                        |                             | U59183             | 940-1737        |
|                        |                             | X75562             | 135-932         |
| <b>BL2D_OXA1_7</b>     | <b>beta-lactamase types</b> |                    |                 |
| cloxacillin            | None                        | AB218659           | 1-828           |
| penicillin             |                             | AF326777           | 17078-17905     |
|                        |                             | AJ238349           | 126-953         |
|                        |                             | AY008291           | 1-768           |
|                        |                             | AY139600           | 168-977         |
|                        |                             | EU339234           | 168-995         |
|                        |                             | EU752482           | 1-528           |
| <b>BL2D_OXA2_18</b>    | <b>beta-lactamase types</b> |                    |                 |
| cloxacillin            | None                        | AB188812           | 2960-3784       |
| penicillin             |                             | AF315351           | 673-1497        |
|                        |                             | AF317511           | 2371-3168       |
|                        |                             | AF350424           | 1-771           |
|                        |                             | AF371964           | 119-916         |
|                        |                             | AJ311891           | 3303-4127       |
|                        |                             | AJ564903           | 16610-17434     |
|                        |                             | AY139598           | 1487-2284       |
|                        |                             | AY289608           | 617-1441        |
|                        |                             | AY444814           | 3988-4812       |
|                        |                             | DQ522237           | 3974-4798       |
|                        |                             | DQ767903           | 1281-2078       |

| Resistance type    | Required             | GenBank NO. | Position        |
|--------------------|----------------------|-------------|-----------------|
|                    |                      | DQ993182    | 1190-2014       |
|                    |                      | EF375699    | 2068-2892       |
|                    |                      | EF552405    | 13-837          |
|                    |                      | FM179467    | 1939-2763       |
|                    |                      | L07945      | 61-885          |
|                    |                      | U63835      | 128-952         |
| <b>BL2D_OXA5_2</b> | beta-lactamase types |             |                 |
| cloxacillin        | None                 | AF347074    | 1661-2461       |
| penicillin         |                      | AM932669    | 699-1481        |
| <b>BL2D_OXA9_2</b> | beta-lactamase types |             |                 |
| cloxacillin        | None                 | AF034958    | 4029-4850       |
| penicillin         |                      | EU383016    | 34481-35302     |
| <b>BL2D_R39_1</b>  | beta-lactamase types |             |                 |
| cloxacillin        | None                 | X53650      | 321-1232        |
| penicillin         |                      |             |                 |
| <b>BL2E_CBLA_1</b> | beta-lactamase types |             |                 |
| cephalosporin      | None                 | L08472      | 848-1735        |
| <b>BL2E_CBPA_4</b> | beta-lactamase types |             |                 |
| cephalosporin      | None                 | AP006841    | 1484728-1485627 |
|                    |                      | CR626927    | 1461127-1462026 |
|                    |                      | L13472      | 436-1335        |
|                    |                      | U05886      | 404-1303        |
| <b>BL2E_CFXA_3</b> | beta-lactamase types |             |                 |
| cephalosporin      | None                 | AF118110    | 75-1037         |
|                    |                      | AF472622    | 53-1015         |
|                    |                      | AY753591    | 1-867           |
| <b>BL2E_FPM_4</b>  | beta-lactamase types |             |                 |
| cephalosporin      | None                 | AF324468    | 1221-2114       |
|                    |                      | D29982      | 212-1111        |
|                    |                      | D37831      | 1468-2367       |
|                    |                      | X80128      | 1259-2158       |
| <b>BL2E_Y56_3</b>  | beta-lactamase types |             |                 |
| cephalosporin      | None                 | AM286415    | 2210347-2211228 |
|                    |                      | AY954728    | 12-893          |
|                    |                      | X57074      | 338-1219        |
| <b>BL2F_NMCA_3</b> | beta-lactamase types |             |                 |
| carbapenem         | None                 | AJ536087    | 1111-1905       |
| cephalosporin      |                      | AY780889    | 7894-8688       |
| penicillin         |                      | U50278      | 1345-2139       |
| <b>BL2F_SME1_1</b> | beta-lactamase types |             |                 |
| carbapenem         | None                 | AF275256    | 1-882           |
| cephalosporin      |                      |             |                 |
| penicillin         |                      |             |                 |

| <b>Resistance type</b>                 | <b>Required</b> | <b>GenBank NO.</b> | <b>Position</b> |
|----------------------------------------|-----------------|--------------------|-----------------|
| <b>BL2_GES_6</b> beta-lactamase types  |                 |                    |                 |
| cephalosporin                          | None            | AB113580           | 1330-2190       |
| penicillin                             |                 | AF156486           | 1332-2192       |
|                                        |                 | AY953375           | 1-543           |
|                                        |                 | DQ333893           | 1-795           |
|                                        |                 | DQ660416           | 1-810           |
|                                        |                 | EF219163           | 1-783           |
| <b>BL2_KPC_7</b> beta-lactamase types  |                 |                    |                 |
| carbapenem                             | None            | AF297554           | 131-1009        |
| cephalosporin                          |                 | AF395881           | 1-879           |
| cephamycin                             |                 | AY522950           | 2-835           |
| penicillin                             |                 | AY700571           | 3-878           |
|                                        |                 | EU244644           | 2-847           |
|                                        |                 | EU594576           | 103-948         |
|                                        |                 | FJ223607           | 8079-8957       |
| <b>BL2_LEN_21</b> beta-lactamase types |                 |                    |                 |
| penicillin                             | None            | AF452105           | 1-831           |
|                                        |                 | AJ635400           | 1-789           |
|                                        |                 | AJ635403           | 1-789           |
|                                        |                 | AJ635405           | 1-789           |
|                                        |                 | AJ635418           | 1-789           |
|                                        |                 | AJ635423           | 1-789           |
|                                        |                 | AJ635424           | 1-789           |
|                                        |                 | AM850908           | 1-858           |
|                                        |                 | AM850909           | 1-858           |
|                                        |                 | AM850910           | 1-858           |
|                                        |                 | AM850911           | 1-858           |
|                                        |                 | AM850912           | 1-858           |
|                                        |                 | AM850913           | 1-858           |
|                                        |                 | AM850914           | 31-888          |
|                                        |                 | AY130286           | 2-811           |
|                                        |                 | AY130287           | 2-811           |
|                                        |                 | AY633109           | 1-858           |
|                                        |                 | CP000964           | 2835134-2835991 |
|                                        |                 | DQ149134           | 1-858           |
|                                        |                 | DQ478688           | 9-815           |
|                                        |                 | X04515             | 286-1116        |
| <b>BL2_VEB_2</b> beta-lactamase types  |                 |                    |                 |
| cephalosporin                          | None            | AF010416           | 164-1060        |
| penicillin                             |                 | CU459141           | 3660740-3661636 |
| <b>BL3_CCRA_8</b> beta-lactamase types |                 |                    |                 |
| carbapenem                             | None            | AB087225           | 1-747           |
| cephalosporin                          |                 | AB087229           | 1-747           |



| <b>Resistance type</b> | <b>Required</b>             | <b>GenBank NO.</b> | <b>Position</b> |
|------------------------|-----------------------------|--------------------|-----------------|
| cephamycin             |                             | AF275830           | 2-331           |
| penicillin             |                             | AF275831           | 2-331           |
|                        |                             | AF275832           | 2-331           |
|                        |                             | AF429432           | 1501-2247       |
|                        |                             | EU595393           | 1722-2468       |
|                        |                             | X85036             | 1-693           |
| <b>BL3_CIT_2</b>       | <b>beta-lactamase types</b> |                    |                 |
| carbapenem             | None                        | AB364006           | 62-784          |
| cephalosporin          |                             | AY236224           | 20609-21325     |
| cephamycin             |                             |                    |                 |
| penicillin             |                             |                    |                 |
| <b>BL3_CPHA_15</b>     | <b>beta-lactamase types</b> |                    |                 |
| carbapenem             | None                        | AJ548797           | 924-1685        |
| cephalosporin          |                             | AY112998           | 197-958         |
| cephamycin             |                             | AY227050           | 131-880         |
| penicillin             |                             | AY227051           | 1-762           |
|                        |                             | AY227052           | 1-762           |
|                        |                             | AY227053           | 1-762           |
|                        |                             | AY261375           | 1-762           |
|                        |                             | AY261377           | 1-762           |
|                        |                             | AY261378           | 1-762           |
|                        |                             | AY261379           | 1-762           |
|                        |                             | CP000462           | 792490-793236   |
|                        |                             | CP000644           | 3904766-3905527 |
|                        |                             | U60294             | 1-762           |
|                        |                             | X57102             | 148-909         |
|                        |                             | Y10415             | 126-890         |
| <b>BL3_GIM_1</b>       | <b>beta-lactamase types</b> |                    |                 |
| carbapenem             | None                        | AJ620678           | 1041-1790       |
| cephalosporin          |                             |                    |                 |
| cephamycin             |                             |                    |                 |
| penicillin             |                             |                    |                 |
| <b>BL3_IMP_22</b>      | <b>beta-lactamase types</b> |                    |                 |
| carbapenem             | None                        | AB010417           | 1-738           |
| cephalosporin          |                             | AB040994           | 1-738           |
| cephamycin             |                             | AB070224           | 1541-2278       |
| penicillin             |                             | AB074436           | 17-751          |
|                        |                             | AB182996           | 1-738           |
|                        |                             | AB184976           | 1-738           |
|                        |                             | AF244145           | 1-738           |
|                        |                             | AF290912           | 1-738           |
|                        |                             | AF318077           | 1148-1885       |
|                        |                             | AJ420864           | 156-893         |

| Resistance type   | Required                    | GenBank NO. | Position        |
|-------------------|-----------------------------|-------------|-----------------|
|                   |                             | AJ512502    | 138-875         |
|                   |                             | AJ584652    | 1044-1781       |
|                   |                             | AM283490    | 1527-2264       |
|                   |                             | AY033653    | 2788-3522       |
|                   |                             | AY055216    | 98-835          |
|                   |                             | AY168635    | 1-738           |
|                   |                             | AY553333    | 114-851         |
|                   |                             | AY780674    | 1-738           |
|                   |                             | DQ307573    | 3-740           |
|                   |                             | DQ361087    | 357-1094        |
|                   |                             | EU352796    | 1-735           |
|                   |                             | FJ384365    | 1039-1776       |
| <b>BL3_L_7</b>    | <b>beta-lactamase types</b> |             |                 |
| carbapenem        | None                        | AB294542    | 1-870           |
| cephalosporin     |                             | AJ251815    | 1-870           |
| cephamycin        |                             | AJ272109    | 1-885           |
| penicillin        |                             | CP001111    | 2406741-2407610 |
|                   |                             | EF126053    | 1-870           |
|                   |                             | EF126061    | 1-870           |
|                   |                             | X75074      | 512-1381        |
| <b>BL3_SHW_3</b>  | <b>beta-lactamase types</b> |             |                 |
| carbapenem        | None                        | AY590118    | 1-747           |
| cephalosporin     |                             | AY590119    | 1-732           |
| cephamycin        |                             | CP000302    | 941609-942415   |
| penicillin        |                             |             |                 |
| <b>BL3_SIM_1</b>  | <b>beta-lactamase types</b> |             |                 |
| carbapenem        | None                        | AY887066    | 494-1231        |
| cephalosporin     |                             |             |                 |
| cephamycin        |                             |             |                 |
| penicillin        |                             |             |                 |
| <b>BL3_VIM_15</b> | <b>beta-lactamase types</b> |             |                 |
| carbapenem        | None                        | AF191564    | 1316-2113       |
| cephalosporin     |                             | AF317511    | 188-985         |
| cephamycin        |                             | AF531419    | 32-829          |
| penicillin        |                             | AJ511268    | 397-1194        |
|                   |                             | AJ536835    | 150-944         |
|                   |                             | AM183120    | 550-1344        |
|                   |                             | AM778091    | 27-812          |
|                   |                             | AM778842    | 12351-13145     |
|                   |                             | AY144612    | 1-798           |
|                   |                             | AY524987    | 1-798           |
|                   |                             | AY635904    | 1-798           |
|                   |                             | DQ287356    | 203-1000        |

| Resistance type | Required | GenBank NO.                             | Position        |
|-----------------|----------|-----------------------------------------|-----------------|
|                 |          | EF394441                                | 1-798           |
|                 |          | EU118148                                | 1011-1808       |
|                 |          | EU419745                                | 1-798           |
| <b>BLE_5</b>    |          |                                         |                 |
| bleomycin       | None     | AB037419                                | 1930            |
|                 |          | AF051917                                | 21243-21638     |
|                 |          | AF288421                                | 3484-3717       |
|                 |          | DQ264732                                | 3141-3365       |
|                 |          | EU370913                                | 44192-44578     |
| <b>BLT_2</b>    |          | Multidrug resistance efflux pump.       |                 |
| chloramphenicol | None     | D84432                                  | 1441-2640       |
| doxorubicin     |          | L32599                                  | 1237-2436       |
| fluoroquinolone |          |                                         |                 |
| puromycin       |          |                                         |                 |
| <b>BMR_2</b>    |          | multidrug resistance transporters types |                 |
| chloramphenicol | None     | D84432                                  | 223825-224991   |
| fluoroquinolone |          | L25604                                  | 1221-2387       |
| <b>CARA_1</b>   |          | MLSB resistance types                   |                 |
| lincosamide     | None     | M80346                                  | 411-2063        |
| macrolide       |          |                                         |                 |
| streptogramin_b |          |                                         |                 |
| <b>CATA10_1</b> |          |                                         |                 |
| chloramphenicol | None     | AY238971                                | 1055-1738       |
| <b>CATA11_2</b> |          |                                         |                 |
| chloramphenicol | None     | AF031037                                | 489-1109        |
|                 |          | L02937                                  | 4210-4830       |
| <b>CATA13_2</b> |          |                                         |                 |
| chloramphenicol | None     | AF191638                                | 4075-4695       |
|                 |          | CP000645                                | 94646-95266     |
| <b>CATA14_2</b> |          |                                         |                 |
| chloramphenicol | None     | AB262965                                | 2909-3556       |
|                 |          | DQ520941                                | 849-1496        |
| <b>CATA15_2</b> |          |                                         |                 |
| chloramphenicol | None     | CP000721                                | 3755871-3756527 |
|                 |          | M93113                                  | 145-801         |
| <b>CATA16_2</b> |          |                                         |                 |
| chloramphenicol | None     | AJ971089                                | 27589-28245     |
|                 |          | M55620                                  | 459-1115        |
| <b>CATA1_14</b> |          |                                         |                 |
| chloramphenicol | None     | AB001326                                | 905-1561        |
|                 |          | AB015619                                | 826-1482        |
|                 |          | AB052891                                | 1761-2417       |

| Resistance type | Required | GenBank NO. | Position      |
|-----------------|----------|-------------|---------------|
|                 |          | AB183146    | 193-849       |
|                 |          | AB277723    | 8791-9447     |
|                 |          | AC220061    | 98734-99390   |
|                 |          | AF083407    | 120-776       |
|                 |          | AF100174    | 8357-9013     |
|                 |          | AF108217    | 5503-6159     |
|                 |          | AF187996    | 4327-4983     |
|                 |          | AF234292    | 5142-5798     |
|                 |          | AF361302    | 2623-3279     |
|                 |          | EU496094    | 107-763       |
|                 |          | X99398      | 1892-2548     |
| <b>CATA2_8</b>  |          |             |               |
| chloramphenicol | None     | AB082569    | 123-761       |
|                 |          | AB262968    | 2739-3377     |
|                 |          | AB375472    | 29-667        |
|                 |          | AJ517791    | 6188-6826     |
|                 |          | AJ627386    | 17573-18211   |
|                 |          | AY509004    | 10017-10655   |
|                 |          | DQ401103    | 36864-37502   |
|                 |          | X53796      | 187-825       |
| <b>CATA3_1</b>  |          |             |               |
| chloramphenicol | None     | AJ249249    | 2495-3133     |
| <b>CATA4_2</b>  |          |             |               |
| chloramphenicol | None     | AM942759    | 802276-802926 |
|                 |          | M11587      | 880-1530      |
| <b>CATA6_1</b>  |          |             |               |
| chloramphenicol | None     | K00544      | 145-804       |
| <b>CATA7_6</b>  |          |             |               |
| chloramphenicol | None     | AB369999    | 2267-2911     |
|                 |          | AY230218    | 12502-13146   |
|                 |          | M64281      | 208-852       |
|                 |          | U00453      | 2638-3282     |
|                 |          | U38429      | 1149-1793     |
|                 |          | X60827      | 88-732        |
| <b>CATA8_4</b>  |          |             |               |
| chloramphenicol | None     | AF507977    | 17464-18108   |
|                 |          | M58516      | 90-713        |
|                 |          | M90091      | 86-730        |
|                 |          | X92946      | 21919-22563   |
| <b>CATA9_6</b>  |          |             |               |
| chloramphenicol | None     | AB042426    | 2104-2751     |
|                 |          | AB055651    | 3593-4240     |
|                 |          | AB080798    | 2659-3306     |

| Resistance type                                        | Required | GenBank NO. | Position        |
|--------------------------------------------------------|----------|-------------|-----------------|
|                                                        |          | AJ312056    | 386-1033        |
|                                                        |          | FM201786    | 7495-8142       |
|                                                        |          | U75299      | 657-1271        |
| <b>CATB1_1</b>                                         |          |             |                 |
| chloramphenicol                                        |          | AE007870    | 1905632-1906258 |
| <b>CATB2_2</b>                                         |          |             |                 |
| chloramphenicol                                        | None     | AF047479    | 5957-6586       |
|                                                        |          | AY232670    | 3528-4157       |
| <b>CATB3_18</b>                                        |          |             |                 |
| chloramphenicol                                        | None     | AB186118    | 703-1332        |
|                                                        |          | AB195796    | 771-1400        |
|                                                        |          | AF227506    | 253-882         |
|                                                        |          | AF418284    | 1464-2093       |
|                                                        |          | AF445082    | 3438-4067       |
|                                                        |          | AM939644    | 709-1338        |
|                                                        |          | AY557339    | 926-1555        |
|                                                        |          | DQ141319    | 686-1315        |
|                                                        |          | DQ321671    | 794-1423        |
|                                                        |          | DQ343904    | 697-1326        |
|                                                        |          | DQ462519    | 86-715          |
|                                                        |          | EF105290    | 760-1389        |
|                                                        |          | EF488369    | 814-1443        |
|                                                        |          | EF516991    | 771-1400        |
|                                                        |          | EU430601    | 811-1440        |
|                                                        |          | EU495237    | 7641-8270       |
|                                                        |          | EU886981    | 1967-2596       |
|                                                        |          | FJ460181    | 84-713          |
| <b>CATB4_5</b>                                         |          |             |                 |
| chloramphenicol                                        | None     | AE004091    | 779466-780101   |
|                                                        |          | AF036933    | 177-812         |
|                                                        |          | AY657540    | 1-636           |
|                                                        |          | CP000438    | 4900296-4900931 |
|                                                        |          | FM209186    | 5075462-5076079 |
| <b>CATB5_1</b>                                         |          |             |                 |
| chloramphenicol                                        | None     | AE003853    | 315311-315937   |
| <b>CEOA_4</b> multidrug resistance transporters types  |          |             |                 |
| chloramphenicol                                        | ceob     | AM747721    | 2896059-2896754 |
|                                                        | opcm     | CP000379    | 31696-33258     |
|                                                        |          | CP000459    | 2445291-2446853 |
|                                                        |          | U970421     | 1-1215          |
| <b>CEOB_29</b> multidrug resistance transporters types |          |             |                 |
| chloramphenicol                                        | opcm     | AM167904    | 338343-341522   |
|                                                        | ceoa     | AM406670    | 2845776-2848964 |

| Resistance type  | Required                                       | GenBank NO. | Position        |
|------------------|------------------------------------------------|-------------|-----------------|
|                  |                                                | AM747721    | 2892887-2895967 |
|                  |                                                | AM902716    | 4766367-4769549 |
|                  |                                                | AP009386    | 2208532-2211612 |
|                  |                                                | BX571966    | 392243-395425   |
|                  |                                                | CP000011    | 1592674-1595856 |
|                  |                                                | CP000085    | 2585999-2589181 |
|                  |                                                | CP000089    | 4116296-4119481 |
|                  |                                                | CP000125    | 2230931-2234113 |
|                  |                                                | CP000152    | 316116-319196   |
|                  |                                                | CP000271    | 2418918-2422100 |
|                  |                                                | CP000284    | 1931909-1935094 |
|                  |                                                | CP000379    | 33307-36387     |
|                  |                                                | CP000441    | 1685008-1688088 |
|                  |                                                | CP000459    | 2442162-2445242 |
|                  |                                                | CP000521    | 2669156-2672332 |
|                  |                                                | CP000545    | 2190820-2194002 |
|                  |                                                | CP000571    | 465258-468440   |
|                  |                                                | CP000615    | 315903-318983   |
|                  |                                                | CP000863    | 2642297-2645473 |
|                  |                                                | CP000869    | 263692-266772   |
|                  |                                                | CP000959    | 1949060-1952140 |
|                  |                                                | CP001026    | 2431183-2434263 |
|                  |                                                | CP001044    | 1703393-1706575 |
|                  |                                                | CP001053    | 609884-613066   |
|                  |                                                | CP001172    | 1240078-1243254 |
|                  |                                                | CU468230    | 1365942-1369118 |
|                  |                                                | U97042      | 1264-4344       |
| <b>CML_E1_19</b> | <b>multidrug resistance transporters types</b> |             |                 |
| chloramphenicol  | None                                           | AB212941    | 962-2218        |
|                  |                                                | AB214531    | 962-2218        |
|                  |                                                | AB285479    | 1601-2857       |
|                  |                                                | AF034958    | 2642-3868       |
|                  |                                                | AF156486    | 3649-4905       |
|                  |                                                | AF205943    | 5988-7244       |
|                  |                                                | AF294653    | 2750-4006       |
|                  |                                                | AJ487033    | 1605-2855       |
|                  |                                                | AJ704863    | 20836-22092     |
|                  |                                                | AJ867237    | 949-2202        |
|                  |                                                | AY509004    | 40610-41860     |
|                  |                                                | AY816215    | 1669-2754       |
|                  |                                                | AY816216    | 3247-4497       |
|                  |                                                | AY912492    | 143-1399        |
|                  |                                                | DQ018384    | 1794-3050       |

| Resistance type  | Required                                | GenBank NO. | Position        |
|------------------|-----------------------------------------|-------------|-----------------|
|                  |                                         | DQ266448    | 894-2150        |
|                  |                                         | DQ445306    | 709-1965        |
|                  |                                         | EU182575    | 1686-2942       |
|                  |                                         | M64556      | 607-1857        |
| <b>CML_E2_1</b>  | multidrug resistance transporters types |             |                 |
| chloramphenicol  | None                                    | M22614      | 427-1332        |
| <b>CML_E3_12</b> | multidrug resistance transporters types |             |                 |
| chloramphenicol  | None                                    | AB114188    | 11605-12816     |
|                  |                                         | AF071555    | 4445-5656       |
|                  |                                         | AF097407    | 1-1197          |
|                  |                                         | AF332662    | 1657-2868       |
|                  |                                         | AJ871969    | 7317-8528       |
|                  |                                         | AM296480    | 67-1278         |
|                  |                                         | AY499130    | 66-1277         |
|                  |                                         | AY963803    | 5418-6629       |
|                  |                                         | CU459141    | 3673547-3674758 |
|                  |                                         | DQ205478    | 1-1212          |
|                  |                                         | DQ647028    | 7147-8358       |
|                  |                                         | FM179941    | 3545-4756       |
| <b>CML_E4_2</b>  | multidrug resistance transporters types |             |                 |
| chloramphenicol  | None                                    | AJ549214    | 177-1601        |
|                  |                                         | AJ715531    | 4838-6262       |
| <b>CML_E5_2</b>  | multidrug resistance transporters types |             |                 |
| chloramphenicol  | None                                    | AL939132    | 123018-124193   |
|                  |                                         | X59968      | 508-1683        |
| <b>CML_E6_1</b>  | multidrug resistance transporters types |             |                 |
| chloramphenicol  | None                                    | U09991      | 28-1335         |
| <b>CML_E7_3</b>  | multidrug resistance transporters types |             |                 |
| chloramphenicol  | None                                    | AB094127    | 1541-2713       |
|                  |                                         | AF015087    | 436-1608        |
|                  |                                         | Z12001      | 993-2165        |
| <b>CML_E8_3</b>  | multidrug resistance transporters types |             |                 |
| chloramphenicol  | None                                    | AF024666    | 15880-17052     |
|                  |                                         | AM942444    | 1796059-1797231 |
|                  |                                         | S74034      | 3521-4129       |
| <b>DFRA10_2</b>  |                                         |             |                 |
| trimethoprim     | None                                    | AY049746    | 3571-4131       |
|                  |                                         | CU459141    | 3651837-3652397 |
| <b>DFRA12_7</b>  |                                         |             |                 |
| trimethoprim     | None                                    | AB154407    | 74-568          |
|                  |                                         | AB196348    | 106-600         |
|                  |                                         | AM932675    | 106-600         |
|                  |                                         | AY551331    | 1392-1886       |

| Resistance type | Required | GenBank NO. | Position      |
|-----------------|----------|-------------|---------------|
|                 |          | AY748453    | 1314-1808     |
|                 |          | DQ323053    | 1456-1950     |
|                 |          | EF204550    | 103-588       |
| <b>DFRA13_1</b> |          |             |               |
| trimethoprim    | None     | Z50802718   | 718-1212      |
| <b>DFRA14_4</b> |          |             |               |
| trimethoprim    | None     | AF393510    | 14-484        |
|                 |          | AJ851089    | 50156-50626   |
|                 |          | FM877480    | 122-592       |
|                 |          | Z50804      | 235-705       |
| <b>DFRA15_1</b> |          |             |               |
| trimethoprim    | None     | AB113114    | 100-570       |
| <b>DFRA16_2</b> |          |             |               |
| trimethoprim    | None     | AF077008    | 115-585       |
|                 |          | AF174129    | 1352-1822     |
| <b>DFRA17_4</b> |          |             |               |
| trimethoprim    | None     | AB126604    | 98-568        |
|                 |          | AB196349    | 119-589       |
|                 |          | AF180469    | 119-589       |
|                 |          | AM886293    | 109107-109577 |
| <b>DFRA19_1</b> |          |             |               |
| trimethoprim    | None     | AJ310778    | 7004-7570     |
| <b>DFRA1_23</b> |          |             |               |
| trimethoprim    | None     | AB113113    | 115-570       |
|                 |          | AB161451    | 137-592       |
|                 |          | AB188271    | 401-856       |
|                 |          | AB189263    | 132-587       |
|                 |          | AF203818    | 99-554        |
|                 |          | AJ238350    | 92-547        |
|                 |          | AJ419168    | 133-588       |
|                 |          | AJ698325    | 17991-18446   |
|                 |          | AJ698460    | 112-750       |
|                 |          | AJ844287    | 133-588       |
|                 |          | AM261760    | 65474-65929   |
|                 |          | AM997276    | 133-588       |
|                 |          | AY007807    | 51-706        |
|                 |          | AY123251    | 2384-2839     |
|                 |          | AY968682    | 989-1444      |
|                 |          | DQ018382    | 176-631       |
|                 |          | DQ269444    | 1797-2252     |
|                 |          | DQ915925    | 1028-1312     |
|                 |          | DQ915931    | 888-1343      |
|                 |          | EF634238    | 1-429         |



| Resistance type                                       | Required | GenBank NO. | Position      |
|-------------------------------------------------------|----------|-------------|---------------|
|                                                       |          | FJ215857    | 130-585       |
|                                                       |          | FJ442932    | 1-444         |
|                                                       |          | FM207631    | 864-1319      |
| <b>DFRA20_1</b>                                       |          |             |               |
| trimethoprim                                          | None     | AJ605332    | 1304-1810     |
| <b>DFRA21_1</b>                                       |          |             |               |
| trimethoprim                                          | None     | AJ870926    | 5516-6010     |
| <b>DFRA22_2</b>                                       |          |             |               |
| trimethoprim                                          | None     | AJ628423    | 325-819       |
|                                                       |          | AJ968952    | 245-739       |
| <b>DFRA23_1</b>                                       |          |             |               |
| trimethoprim                                          | None     | AJ746361    | 6746-7303     |
| <b>DFRA24_1</b>                                       |          |             |               |
| trimethoprim                                          | None     | AJ972619    | 83-637        |
| <b>DFRA25_1</b>                                       |          |             |               |
| trimethoprim                                          | None     | AB280920    | 132-587       |
| <b>DFRA26_1</b>                                       |          |             |               |
| trimethoprim                                          | None     | AM403715    | 303-851       |
| <b>DFRA5_1</b>                                        |          |             |               |
| trimethoprim                                          | None     | AB188269    | 117-587       |
| <b>DFRA7_3</b>                                        |          |             |               |
| trimethoprim                                          | None     | AB161450    | 102-572       |
|                                                       |          | AJ884724    | 119-589       |
|                                                       |          | AM412236    | 90680-91150   |
| <b>DFRB1_2</b>                                        |          |             |               |
| trimethoprim                                          | None     | AJ879564    | 168-401       |
|                                                       |          | AM993098    | 1423-1656     |
| <b>DFRB2_3</b>                                        |          |             |               |
| trimethoprim                                          | None     | AF061926    | 1164-1397     |
|                                                       |          | AF136442    | 3228-3461     |
|                                                       |          | AY553333    | 1094-1327     |
| <b>DFRB3_4</b>                                        |          |             |               |
| trimethoprim                                          | None     | AF327729    | 98-331        |
|                                                       |          | FM877478    | 149-382       |
|                                                       |          | X04128      | 335-568       |
|                                                       |          | X72585      | 5960-6193     |
| <b>DFRB6_1</b>                                        |          |             |               |
| trimethoprim                                          | None     | DQ274503    | 394-627       |
| <b>EMEA_4</b> multidrug resistance transporters types |          |             |               |
| fluoroquinolone                                       | None     | AB091338    | 174-1352      |
|                                                       |          | AE006250    | 6155-7315     |
|                                                       |          | AM406671    | 127087-128244 |

| Resistance type | Required                                       | GenBank NO. | Position        |
|-----------------|------------------------------------------------|-------------|-----------------|
|                 |                                                | EU255903    | 1720-2880       |
| <b>EMRD_36</b>  | <b>multidrug resistance transporters types</b> |             |                 |
| aminoglycoside  | emre                                           | AE005174    | 4713374-4714561 |
|                 |                                                | AE005674    | 3897627-3898685 |
|                 |                                                | AE008877    | 2055-3236       |
|                 |                                                | AE014073    | 3875779-3876966 |
|                 |                                                | AE014075    | 4359568-4360755 |
|                 |                                                | AE014613    | 3833348-3834529 |
|                 |                                                | AE017220    | 3939344-3940525 |
|                 |                                                | AM933172    | 3874346-3875527 |
|                 |                                                | AM933173    | 3823361-3824542 |
|                 |                                                | AP009048    | 3785312-3786499 |
|                 |                                                | AP009240    | 4102929-4104116 |
|                 |                                                | CP000026    | 3787888-3789030 |
|                 |                                                | CP000034    | 3891717-3892904 |
|                 |                                                | CP000036    | 3710819-3712006 |
|                 |                                                | CP000038    | 3796932-3798119 |
|                 |                                                | CP000243    | 4119400-4120587 |
|                 |                                                | CP000247    | 4042328-4043515 |
|                 |                                                | CP000647    | 4466041-4467189 |
|                 |                                                | CP000653    | 24605-25786     |
|                 |                                                | CP000802    | 3883497-3884684 |
|                 |                                                | CP000822    | 14146-15327     |
|                 |                                                | CP000880    | 3781113-3782294 |
|                 |                                                | CP000886    | 3947862-3949043 |
|                 |                                                | CP000946    | 26264-27451     |
|                 |                                                | CP000948    | 3949523-3950710 |
|                 |                                                | CP000964    | 23492-24640     |
|                 |                                                | CP000970    | 4130717-4131904 |
|                 |                                                | CP001063    | 3967173-3968360 |
|                 |                                                | CP001113    | 3970273-3971454 |
|                 |                                                | CP001120    | 4013898-4015079 |
|                 |                                                | CP001127    | 3881480-3882661 |
|                 |                                                | CP001138    | 3924190-3925371 |
|                 |                                                | CP001144    | 4032716-4033897 |
|                 |                                                | CU928162    | 4295341-4296528 |
|                 |                                                | CU928163    | 4337136-4338323 |
|                 |                                                | CU928164    | 4452857-4454044 |
| <b>EMRE_10</b>  | <b>multidrug resistance transporters types</b> |             |                 |
| aminoglycoside  | emrd                                           | AE005174    | 1705548-1705877 |
|                 |                                                | AE005674    | 2011996-2012325 |
|                 |                                                | AP009048    | 567538-567867   |
|                 |                                                | AP009240    | 2230005-2230334 |

| Resistance type | Required                     | GenBank NO. | Position        |
|-----------------|------------------------------|-------------|-----------------|
|                 |                              | CP000038    | 2092982-2093311 |
|                 |                              | CP000243    | 2038123-2038452 |
|                 |                              | CP000802    | 2031767-2032096 |
|                 |                              | CP001164    | 1558248-1558577 |
|                 |                              | CU928145    | 2198066-2198395 |
|                 |                              | CU928162    | 2131690-2132019 |
| <b>EREA_3</b>   | <b>MLSB resistance types</b> |             |                 |
| erythromycin    | None                         | AB188269    | 741-1964        |
|                 |                              | AY183453    | 2730-3947       |
|                 |                              | DQ157752    | 2700-3917       |
| <b>EREB_2</b>   | <b>MLSB resistance types</b> |             |                 |
| erythromycin    | None                         | AB207867    | 6079-7335       |
|                 |                              | AF466411    | 2-493           |
| <b>ERMA_5</b>   | <b>MLSB resistance types</b> |             |                 |
| lincosamide     | None                         | AB037671    | 52369-53097     |
| macrolide       |                              | AB047088    | 13444-14172     |
| streptogramin_b |                              | AF002716    | 211-939         |
|                 |                              | AF443782    | 134-847         |
|                 |                              | AP009324    | 55963-56691     |
| <b>ERMB_42</b>  | <b>MLSB resistance types</b> |             |                 |
| lincosamide     | None                         | AB057644    | 5167-5901       |
| macrolide       |                              | AB089505    | 1-735           |
| streptogramin_b |                              | AB426620    | 4320-5054       |
|                 |                              | AB426622    | 894-1628        |
|                 |                              | AF006008    | 2-658           |
|                 |                              | AF030064    | 851-1585        |
|                 |                              | AF060240    | 1610-2344       |
|                 |                              | AF109075    | 4433-5167       |
|                 |                              | AF368302    | 1-711           |
|                 |                              | AM180355    | 2319377-2320111 |
|                 |                              | AY345595    | 58061-58795     |
|                 |                              | AY556392    | 326-1060        |
|                 |                              | AY557620    | 260-994         |
|                 |                              | AY827542    | 1-729           |
|                 |                              | AY827544    | 1-729           |
|                 |                              | AY827545    | 1-729           |
|                 |                              | DQ304775    | 1-639           |
|                 |                              | DQ315672    | 1-639           |
|                 |                              | DQ395278    | 3-575           |
|                 |                              | DQ855649    | 285-941         |
|                 |                              | EF213674    | 3-575           |
|                 |                              | EU168275    | 1-639           |
|                 |                              | EU168276    | 1-639           |

| Resistance type | Required                     | GenBank NO. | Position      |
|-----------------|------------------------------|-------------|---------------|
|                 |                              | EU168279    | 1-639         |
|                 |                              | EU168280    | 1-639         |
|                 |                              | EU168281    | 1-639         |
|                 |                              | EU168291    | 1-639         |
|                 |                              | EU168299    | 1-639         |
|                 |                              | EU168300    | 1-639         |
|                 |                              | EU168303    | 1-639         |
|                 |                              | EU168304    | 1-639         |
|                 |                              | EU168305    | 1-639         |
|                 |                              | EU168306    | 1-639         |
|                 |                              | EU168309    | 1-639         |
|                 |                              | EU168310    | 1-639         |
|                 |                              | EU168320    | 1-639         |
|                 |                              | EU168323    | 1-639         |
|                 |                              | EU168326    | 1-639         |
|                 |                              | EU168330    | 1-639         |
|                 |                              | EU352643    | 1-687         |
|                 |                              | EU595404    | 39-728        |
|                 |                              | K00551      | 318-1052      |
| <b>ERMC_16</b>  | <b>MLSB resistance types</b> |             |               |
| lincosamide     | None                         | AE002098    | 75694-76425   |
| macrolide       |                              | AF019140    | 524-1255      |
| streptogramin_b |                              | AF076212    | 7275-8006     |
|                 |                              | AF276982    | 1605-2336     |
|                 |                              | AF307747    | 4866-5597     |
|                 |                              | AM159501    | 1176-1907     |
|                 |                              | AP006718    | 319-1050      |
|                 |                              | AY034154    | 313-1044      |
|                 |                              | CP000258    | 7865-8596     |
|                 |                              | DQ887620    | 1-642         |
|                 |                              | M12730      | 780-1511      |
|                 |                              | M19652      | 991-1722      |
|                 |                              | U82607      | 405-1136      |
|                 |                              | Y09001      | 165-896       |
|                 |                              | Y09002      | 58-789        |
|                 |                              | Y09003      | 189-920       |
| <b>ERMD_3</b>   | <b>MLSB resistance types</b> |             |               |
| lincosamide     | None                         | L08389      | 391-1251      |
| macrolide       |                              | M29832      | 430-1290      |
| streptogramin_b |                              | M77505      | 772-1632      |
| <b>ERME_3</b>   | <b>MLSB resistance types</b> |             |               |
| lincosamide     | None                         | AM420293    | 830471-831538 |
| macrolide       |                              | M11200      | 284-1393      |

| <b>Resistance type</b> | <b>Required</b>              | <b>GenBank NO.</b> | <b>Position</b> |
|------------------------|------------------------------|--------------------|-----------------|
| streptogramin_b        |                              | X51891             | 190-1257        |
| <b>ERMF_3</b>          | <b>MLSB resistance types</b> |                    |                 |
| lincosamide            | None                         | AF203972           | 3604-4401       |
| macrolide              |                              | AF219231           | 293-1090        |
| streptogramin_b        |                              | AJ311171           | 13573-14352     |
| <b>ERMG_3</b>          | <b>MLSB resistance types</b> |                    |                 |
| lincosamide            | None                         | AJ557257           | 6634-7365       |
| macrolide              |                              | EF155418           | 3650-4381       |
| streptogramin_b        |                              | M15332             | 672-1403        |
| <b>ERMH_1</b>          | <b>MLSB resistance types</b> |                    |                 |
| lincosamide            | None                         | M16503             | 244-1140        |
| macrolide              |                              |                    |                 |
| streptogramin_b        |                              |                    |                 |
| <b>ERMN_1</b>          | <b>MLSB resistance types</b> |                    |                 |
| lincosamide            | None                         | X97721             | 160-1032        |
| macrolide              |                              |                    |                 |
| streptogramin_b        |                              |                    |                 |
| <b>ERMO_2</b>          | <b>MLSB resistance types</b> |                    |                 |
| lincosamide            | None                         | AJ223970           | 21-797          |
| macrolide              |                              | AL939126           | 103826-104605   |
| streptogramin_b        |                              |                    |                 |
| <b>ERMQ_1</b>          | <b>MLSB resistance types</b> |                    |                 |
| lincosamide            | None                         | L22689             | 262-1032        |
| macrolide              |                              |                    |                 |
| streptogramin_b        |                              |                    |                 |
| <b>ERMR_1</b>          | <b>MLSB resistance types</b> |                    |                 |
| lincosamide            | None                         | AY623658           | 12450-13469     |
| macrolide              |                              |                    |                 |
| streptogramin_b        |                              |                    |                 |
| <b>ERMS_1</b>          | <b>MLSB resistance types</b> |                    |                 |
| lincosamide            | None                         | M19269             | 460-1416        |
| macrolide              |                              |                    |                 |
| streptogramin_b        |                              |                    |                 |
| <b>ERMT_2</b>          | <b>MLSB resistance types</b> |                    |                 |
| lincosamide            | None                         | AF310974           | 934-1665        |
| macrolide              |                              | EU192194           | 15-740          |
| streptogramin_b        |                              |                    |                 |
| <b>ERMU_2</b>          | <b>MLSB resistance types</b> |                    |                 |
| lincosamide            | None                         | EU124663           | 28458-29294     |
| macrolide              |                              | X62867             | 361-1194        |
| streptogramin_b        |                              |                    |                 |
| <b>ERMV_1</b>          | <b>MLSB resistance types</b> |                    |                 |

| <b>Resistance type</b>                      | <b>Required</b>              | <b>GenBank NO.</b>                                                                                                 | <b>Position</b>                                                                                                                 |
|---------------------------------------------|------------------------------|--------------------------------------------------------------------------------------------------------------------|---------------------------------------------------------------------------------------------------------------------------------|
| lincosamide<br>macrolide<br>streptogramin_b | None                         | U59450                                                                                                             | 397-1173                                                                                                                        |
| <b>ERMW_1</b>                               | <b>MLSB resistance types</b> |                                                                                                                    |                                                                                                                                 |
| lincosamide<br>macrolide<br>streptogramin_b | None                         | D14532                                                                                                             | 1039-1905                                                                                                                       |
| <b>ERMX_10</b>                              | <b>MLSB resistance types</b> |                                                                                                                    |                                                                                                                                 |
| lincosamide<br>macrolide<br>streptogramin_b | None                         | AF024666<br>AF338705<br>AF338706<br>AF411029<br>AF492560<br>AM748797<br>AM748801<br>AY255627<br>CR931997<br>M36726 | 2241-2969<br>1764-2615<br>1234-2085<br>1556-2284<br>1929-2780<br>148-999<br>136-987<br>3668-4504<br>1693703-1694554<br>296-1147 |
| <b>ERMY_3</b>                               | <b>MLSB resistance types</b> |                                                                                                                    |                                                                                                                                 |
| lincosamide<br>macrolide<br>streptogramin_b | None                         | AB014481<br>AB092817<br>AB179623                                                                                   | 556-1287<br>8880-9611<br>19429-20160                                                                                            |
| <b>FOSA_2</b>                               |                              |                                                                                                                    |                                                                                                                                 |
| fosfomycin                                  | None                         | EU487198<br>M85195                                                                                                 | 217-639<br>296-718                                                                                                              |
| <b>FOSB_1</b>                               |                              |                                                                                                                    |                                                                                                                                 |
| fosfomycin                                  | None                         | CP000560                                                                                                           | 1093031-1093471                                                                                                                 |
| <b>FOSC_2</b>                               |                              |                                                                                                                    |                                                                                                                                 |
| fosfomycin                                  | None                         | D82818<br>Z33413                                                                                                   | 1232-1642<br>387-932                                                                                                            |
| <b>FOSX_4</b>                               |                              |                                                                                                                    |                                                                                                                                 |
| fosfomycin                                  | None                         | AE017262<br>AL591981<br>AL596170<br>AM263198                                                                       | 1746424-1746822<br>12502-12900<br>26094-26492<br>1742039-1742437                                                                |
| <b>FUSB_2</b>                               |                              |                                                                                                                    |                                                                                                                                 |
| fusaric_acid                                | None                         | AJ302698<br>AY373761                                                                                               | 81-719<br>19075-19713                                                                                                           |
| <b>FUSH_1</b>                               |                              |                                                                                                                    |                                                                                                                                 |
| fusaric_acid                                | None                         | AL939126                                                                                                           | 125809-127368                                                                                                                   |
| <b>KSGA_43</b>                              |                              |                                                                                                                    |                                                                                                                                 |
| kasugamycin                                 | None                         | AE005174<br>AE005674                                                                                               | 56588-57406<br>50930-51748                                                                                                      |

| <b>Resistance type</b> | <b>Required</b>              | <b>GenBank NO.</b> | <b>Position</b> |
|------------------------|------------------------------|--------------------|-----------------|
|                        |                              | AE008697           | 17237-18055     |
|                        |                              | AE009952           | 4094820-4095635 |
|                        |                              | AE014075           | 54804-55622     |
|                        |                              | AE014613           | 102461-103279   |
|                        |                              | AE017220           | 96884-97702     |
|                        |                              | AL590842           | 522968-523783   |
|                        |                              | AM286415           | 722669-723484   |
|                        |                              | AM933172           | 102235-103053   |
|                        |                              | AP009048           | 51612-52430     |
|                        |                              | AP009240           | 53524-54342     |
|                        |                              | BX571860           | 341709-342524   |
|                        |                              | BX936398           | 749448-750263   |
|                        |                              | CP000026           | 102562-103380   |
|                        |                              | CP000034           | 70734-71552     |
|                        |                              | CP000036           | 40674-41492     |
|                        |                              | CP000038           | 60948-61766     |
|                        |                              | CP000247           | 53718-54536     |
|                        |                              | CP000266           | 50598-51416     |
|                        |                              | CP000647           | 51953-52771     |
|                        |                              | CP000653           | 673904-674722   |
|                        |                              | CP000720           | 3883185-3884000 |
|                        |                              | CP000783           | 3219731-3220549 |
|                        |                              | CP000800           | 54809-55627     |
|                        |                              | CP000822           | 3100690-3101508 |
|                        |                              | CP000826           | 801077-801892   |
|                        |                              | CP000880           | 2842057-2842875 |
|                        |                              | CP000886           | 96976-97794     |
|                        |                              | CP000946           | 3945760-3946578 |
|                        |                              | CP000964           | 4743192-4744010 |
|                        |                              | CP000970           | 58148-58966     |
|                        |                              | CP001063           | 44153-44971     |
|                        |                              | CP001113           | 102631-103449   |
|                        |                              | CP001127           | 102815-103633   |
|                        |                              | CP001138           | 102623-103441   |
|                        |                              | CU928145           | 53539-54357     |
|                        |                              | CU928158           | 62139-62957     |
|                        |                              | CU928162           | 53808-54626     |
|                        |                              | CU928163           | 56051-56869     |
|                        |                              | CU928164           | 60380-61198     |
|                        |                              | FM180568           | 55049-55867     |
|                        |                              | M11054             | 11-829          |
| <b>LMRA_1</b>          | <b>MLSB resistance types</b> |                    |                 |
| lincomycin             | None                         | X59926             | 318-1760        |

| <b>Resistance type</b> | <b>Required</b>                          | <b>GenBank NO.</b>                                                                                                                                                                                                                           | <b>Position</b>                                                                                                                                                                                                                                                                                                                                                        |
|------------------------|------------------------------------------|----------------------------------------------------------------------------------------------------------------------------------------------------------------------------------------------------------------------------------------------|------------------------------------------------------------------------------------------------------------------------------------------------------------------------------------------------------------------------------------------------------------------------------------------------------------------------------------------------------------------------|
| <b>LMRB_2</b>          | <b>MLSB resistance types</b>             |                                                                                                                                                                                                                                              |                                                                                                                                                                                                                                                                                                                                                                        |
| lincomycin             | None                                     | AB000617<br>CP000560                                                                                                                                                                                                                         | 1749-3185<br>268334-269764                                                                                                                                                                                                                                                                                                                                             |
| <b>LNUA_8</b>          | <b>MLSB resistance types</b>             |                                                                                                                                                                                                                                              |                                                                                                                                                                                                                                                                                                                                                                        |
| lincomycin             | None                                     | AM184099<br>AM184101<br>AM184102<br>AM399083<br>AY541446<br>EU596446<br>J03947<br>M14039                                                                                                                                                     | 1704-2186<br>1979-2461<br>1951-2433<br>1936-2418<br>239-721<br>11330-11812<br>645-1127<br>413-895                                                                                                                                                                                                                                                                      |
| <b>LNUB_1</b>          | <b>MLSB resistance types</b>             |                                                                                                                                                                                                                                              |                                                                                                                                                                                                                                                                                                                                                                        |
| lincomycin             | None                                     | AF110130                                                                                                                                                                                                                                     | 127-927                                                                                                                                                                                                                                                                                                                                                                |
| <b>LSA_3</b>           |                                          |                                                                                                                                                                                                                                              |                                                                                                                                                                                                                                                                                                                                                                        |
| lincosamide            | None                                     | AE016830                                                                                                                                                                                                                                     | 2631167-2632660                                                                                                                                                                                                                                                                                                                                                        |
| macrolide              |                                          | AY225127                                                                                                                                                                                                                                     | 41-1534                                                                                                                                                                                                                                                                                                                                                                |
| streptogramin_b        |                                          | AY737525                                                                                                                                                                                                                                     | 310-1803                                                                                                                                                                                                                                                                                                                                                               |
| <b>MACA_21</b>         | <b>Macrolide-specific efflux system.</b> |                                                                                                                                                                                                                                              |                                                                                                                                                                                                                                                                                                                                                                        |
| macrolide              | tolc                                     | AB071145                                                                                                                                                                                                                                     | 28-1140                                                                                                                                                                                                                                                                                                                                                                |
|                        | macb                                     | AE005174<br>AE005674<br>AE008740<br>AE014075<br>AE014613<br>CP000034<br>CP000036<br>CP000243<br>CP000647<br>CP000653<br>CP000783<br>CP000800<br>CP000822<br>CP000880<br>CP000946<br>CP000964<br>CP000970<br>CU928163<br>CU928164<br>FM180568 | 1051970-1053082<br>870548-871660<br>3949-5064<br>973363-974475<br>2049652-2050767<br>2186323-2187396<br>822039-823151<br>880020-881132<br>1018806-1019918<br>1527041-1528153<br>2407765-2408874<br>968587-969699<br>2042195-2043307<br>1955476-1956591<br>2990897-2992009<br>3691616-3692728<br>2308559-2309671<br>1107856-1108995<br>2337072-2338211<br>917513-918625 |
| <b>MACB_38</b>         | <b>Macrolide-specific efflux system.</b> |                                                                                                                                                                                                                                              |                                                                                                                                                                                                                                                                                                                                                                        |
| macrolide              | maca                                     | AB071146                                                                                                                                                                                                                                     | 1-1944                                                                                                                                                                                                                                                                                                                                                                 |
|                        | tolc                                     | AE005174                                                                                                                                                                                                                                     | 1053082-1055025                                                                                                                                                                                                                                                                                                                                                        |



| Resistance type | Required                                 | GenBank NO. | Position        |
|-----------------|------------------------------------------|-------------|-----------------|
|                 |                                          | AE005674    | 871660-873603   |
|                 |                                          | AE008740    | 5064-7007       |
|                 |                                          | AE014613    | 2047709-2049652 |
|                 |                                          | AE017220    | 1004748-1006691 |
|                 |                                          | AL627268    | 172425-174368   |
|                 |                                          | AM933172    | -935904-937847  |
|                 |                                          | AP009240    | 1004221-1006164 |
|                 |                                          | BA000007    | 1051422-1053365 |
|                 |                                          | CP000026    | 1932001-1933944 |
|                 |                                          | CP000034    | 2184374-2186323 |
|                 |                                          | CP000036    | 823151-825094   |
|                 |                                          | CP000038    | 919845-921788   |
|                 |                                          | CP000243    | 881132-883075   |
|                 |                                          | CP000247    | 934080-936023   |
|                 |                                          | CP000266    | 905752-907557   |
|                 |                                          | CP000647    | 1019918-1021855 |
|                 |                                          | CP000653    | 1528153-1530090 |
|                 |                                          | CP000783    | 2405825-2407765 |
|                 |                                          | CP000802    | 980581-982524   |
|                 |                                          | CP000822    | 2040252-2042195 |
|                 |                                          | CP000880    | 1953533-1955476 |
|                 |                                          | CP000886    | 2139376-2141319 |
|                 |                                          | CP000946    | 2988954-2990897 |
|                 |                                          | CP000964    | 3689679-3691616 |
|                 |                                          | CP000970    | 2306616-2308559 |
|                 |                                          | CP001063    | 2251453-2253396 |
|                 |                                          | CP001113    | 981335-983278   |
|                 |                                          | CP001120    | 1024279-1026222 |
|                 |                                          | CP001127    | 1030127-1032070 |
|                 |                                          | CP001138    | 933748-935691   |
|                 |                                          | CP001144    | 1001137-1003080 |
|                 |                                          | CU928145    | 981699-983642   |
|                 |                                          | CU928160    | 972399-974342   |
|                 |                                          | CU928163    | 1108995-1110938 |
|                 |                                          | CU928164    | 2335129-2337072 |
|                 |                                          | FM180568    | 918625-920568   |
| <b>MDTE_6</b>   | <b>Multidrug resistance efflux pump.</b> |             |                 |
| doxorubicin     | mdtf                                     | AE005174    | 4468594-4469748 |
| erythromycin    | tolc                                     | AE014073    | 4136651-4137559 |
|                 |                                          | AP009048    | 3980029-3981183 |
|                 |                                          | AP009240    | 3904374-3905528 |
|                 |                                          | CP000034    | 3274835-3275980 |
|                 |                                          | CU928163    | 4118299-4119453 |

| <b>Resistance type</b> | <b>Required</b>                          | <b>GenBank NO.</b> | <b>Position</b> |
|------------------------|------------------------------------------|--------------------|-----------------|
| <b>MDTF_8</b>          | <b>Multidrug resistance efflux pump.</b> |                    |                 |
| doxorubicin            | tolc                                     | AE005174           | 4469776-4472886 |
| erythromycin           | mdte                                     | AE005674           | 3699584-3702694 |
|                        |                                          | AE014075           | 4099159-4102269 |
|                        |                                          | AP009048           | 3976891-3980001 |
|                        |                                          | CP000034           | 3271700-3274807 |
|                        |                                          | CP000038           | 3741711-3744821 |
|                        |                                          | CP000802           | 3701725-3704835 |
|                        |                                          | CU928163           | 4119481-4122591 |
| <b>MDTG_31</b>         | <b>Multidrug resistance efflux pump.</b> |                    |                 |
| deoxycholate           | None                                     | AE005174           | 1558494-1559717 |
| fosfomycin             |                                          | AE008750           | 5038-6249       |
|                        |                                          | AE014075           | 1257766-1258989 |
|                        |                                          | AE014613           | 1828446-1829657 |
|                        |                                          | AE017220           | 1221303-1222514 |
|                        |                                          | AL627269           | 98526-99737     |
|                        |                                          | AM286415           | 1811994-1813235 |
|                        |                                          | AM933172           | 1996230-1997441 |
|                        |                                          | AM933173           | 2028976-2030187 |
|                        |                                          | AP009048           | 1115844-1117067 |
|                        |                                          | AP009240           | 1197131-1198354 |
|                        |                                          | CP000026           | 1756414-1757625 |
|                        |                                          | CP000243           | 1159232-1160455 |
|                        |                                          | CP000647           | 1216615-1217838 |
|                        |                                          | CP000802           | 1177940-1179166 |
|                        |                                          | CP000822           | 1871362-1872561 |
|                        |                                          | CP000826           | 2068159-2069391 |
|                        |                                          | CP000880           | 1770412-1771623 |
|                        |                                          | CP000886           | 1966141-1967352 |
|                        |                                          | CP000946           | 2794422-2795645 |
|                        |                                          | CP000964           | 3508840-3510075 |
|                        |                                          | CP000970           | 2091807-2093030 |
|                        |                                          | CP001113           | 1243036-1244247 |
|                        |                                          | CP001120           | 1245596-1246807 |
|                        |                                          | CP001127           | 1199556-1200767 |
|                        |                                          | CP001138           | 1971665-1972876 |
|                        |                                          | CP001144           | 2124538-2125749 |
|                        |                                          | CU928145           | 1224404-1225627 |
|                        |                                          | CU928163           | 1279167-1280390 |
|                        |                                          | CU928164           | 2151982-2153205 |
|                        |                                          | FM180568           | 1197778-1199001 |
| <b>MDTH_40</b>         | <b>Multidrug resistance efflux pump.</b> |                    |                 |
| deoxycholate           | None                                     | AE005174           | 1568351-1569556 |

| <b>Resistance type</b> | <b>Required</b>                          | <b>GenBank NO.</b> | <b>Position</b> |
|------------------------|------------------------------------------|--------------------|-----------------|
| fosfomycin             |                                          | AE005674           | 1111882-1113087 |
|                        |                                          | AE008750           | 14853-16058     |
|                        |                                          | AE014075           | 1267621-1268826 |
|                        |                                          | AE014613           | 1818639-1819844 |
|                        |                                          | AE017220           | 1231117-1232322 |
|                        |                                          | AL627269           | 108339-109544   |
|                        |                                          | AM933172           | 1986422-1987627 |
|                        |                                          | AM933173           | 2019166-2020371 |
|                        |                                          | AP009048           | 1125698-1126903 |
|                        |                                          | AP009240           | 1206988-1208193 |
|                        |                                          | BA000007           | 1483265-1484470 |
|                        |                                          | CP000026           | 1746606-1747811 |
|                        |                                          | CP000034           | 1897300-1898118 |
|                        |                                          | CP000036           | 1971366-1972565 |
|                        |                                          | CP000038           | 1165426-1166631 |
|                        |                                          | CP000243           | 1169089-1170294 |
|                        |                                          | CP000247           | 1115004-1116209 |
|                        |                                          | CP000266           | 1129951-1131156 |
|                        |                                          | CP000647           | 1224345-1225550 |
|                        |                                          | CP000653           | 1731418-1732623 |
|                        |                                          | CP000783           | 2217127-2218332 |
|                        |                                          | CP000800           | 1201588-1202793 |
|                        |                                          | CP000802           | 1187800-1189005 |
|                        |                                          | CP000822           | 1861268-1862473 |
|                        |                                          | CP000880           | 1760613-1761800 |
|                        |                                          | CP000886           | 1956334-1957539 |
|                        |                                          | CP000946           | 2784583-2785788 |
|                        |                                          | CP000964           | 3501122-3502327 |
|                        |                                          | CP000970           | 2081968-2083173 |
|                        |                                          | CP001063           | 2057858-2059063 |
|                        |                                          | CP001113           | 1252850-1254055 |
|                        |                                          | CP001120           | 1255410-1256615 |
|                        |                                          | CP001127           | 1209370-1210575 |
|                        | CP001138                                 | 1961857-1963062    |                 |
|                        | CU928160                                 | 1165943-1167178    |                 |
|                        | CU928163                                 | 1289024-1290259    |                 |
|                        | CU928164                                 | 2142113-2143348    |                 |
|                        | FM180568                                 | 1207636-1208841    |                 |
|                        | X92076                                   | 24-1229            |                 |
| <b>MDTK_42</b>         | <b>Multidrug resistance efflux pump.</b> |                    |                 |
| enoxacin               | None                                     | AE005174           | 2418364-2419734 |
| norfloxacin            |                                          | AE008762           | 431-1801        |
|                        |                                          | AE014073           | 1762736-1764106 |

| Resistance type | Required                                 | GenBank NO. | Position        |
|-----------------|------------------------------------------|-------------|-----------------|
|                 |                                          | AE014075    | 1899595-1900965 |
|                 |                                          | AE014613    | 1356371-1357741 |
|                 |                                          | AE017220    | 1539653-1541023 |
|                 |                                          | AL627271    | 50395-51765     |
|                 |                                          | AM933172    | 1725900-1727270 |
|                 |                                          | AP009048    | 1745171-1746541 |
|                 |                                          | AP009240    | 1876950-1878320 |
|                 |                                          | CP000026    | 1508963-1510333 |
|                 |                                          | CP000034    | 1724517-1725887 |
|                 |                                          | CP000036    | 1444165-1445535 |
|                 |                                          | CP000038    | 1567150-1568520 |
|                 |                                          | CP000243    | 1779215-1780585 |
|                 |                                          | CP000247    | 1658415-1659785 |
|                 |                                          | CP000266    | 1722590-1723960 |
|                 |                                          | CP000647    | 2196435-2197805 |
|                 |                                          | CP000653    | 1939274-1940644 |
|                 |                                          | CP000783    | 1962339-1963709 |
|                 |                                          | CP000800    | 1869275-1870645 |
|                 |                                          | CP000802    | 1765481-1766851 |
|                 |                                          | CP000822    | 1610922-1612292 |
|                 |                                          | CP000880    | 1513432-1514802 |
|                 |                                          | CP000886    | 1618578-1619948 |
|                 |                                          | CP000946    | 2171864-2173234 |
|                 |                                          | CP000964    | 2404939-2406309 |
|                 |                                          | CP000970    | 1518032-1519402 |
|                 |                                          | CP001063    | 1704626-1705996 |
|                 |                                          | CP001113    | 1501405-1502775 |
|                 |                                          | CP001120    | 1507480-1508850 |
|                 |                                          | CP001127    | 1465879-1467249 |
|                 |                                          | CP001138    | 1712649-1714019 |
|                 |                                          | CP001144    | 1854713-1856083 |
|                 |                                          | CP001164    | 2249463-2250833 |
|                 |                                          | CU928145    | 1892086-1893456 |
|                 |                                          | CU928162    | 1820949-1822319 |
|                 |                                          | CU928163    | 1978234-1979604 |
|                 |                                          | CU928164    | 1462421-1463791 |
|                 |                                          | FM180568    | 1814877-1816247 |
|                 |                                          | U68703      | 861-2231        |
|                 |                                          | X99944      | 3856-5223       |
| <b>MDTL_25</b>  | <b>Multidrug resistance efflux pump.</b> |             |                 |
| chloramphenicol | None                                     | AE005174    | 4749305-4750474 |
|                 |                                          | AE005674    | 3859199-3860368 |
|                 |                                          | AE014073    | 3914226-3915395 |

| Resistance type | Required                                 | GenBank NO. | Position        |
|-----------------|------------------------------------------|-------------|-----------------|
|                 |                                          | AE014075    | 4393352-4394524 |
|                 |                                          | AP009048    | 3745230-3746402 |
|                 |                                          | AP009240    | 4140632-4141804 |
|                 |                                          | CP000034    | 3933235-3934407 |
|                 |                                          | CP000036    | 3680370-3681542 |
|                 |                                          | CP000038    | 3722402-3723574 |
|                 |                                          | CP000243    | 4153183-4154355 |
|                 |                                          | CP000247    | 4076112-4077284 |
|                 |                                          | CP000266    | 3894102-3895271 |
|                 |                                          | CP000800    | 4208377-4209549 |
|                 |                                          | CP000802    | 3918787-3919959 |
|                 |                                          | CP000822    | 52520-53689     |
|                 |                                          | CP000948    | 3987222-3988394 |
|                 |                                          | CP000970    | 4168283-4169455 |
|                 |                                          | CP001063    | 3936380-3937552 |
|                 |                                          | CU928145    | 4266777-4267949 |
|                 |                                          | CU928158    | 4111444-4112616 |
|                 |                                          | CU928160    | 3962902-3964074 |
|                 |                                          | CU928163    | 4375341-4376513 |
|                 |                                          | CU928164    | 4491953-4493122 |
|                 |                                          | FM180568    | 4188938-4190110 |
|                 |                                          | L10328      | 81012-82181     |
| <b>MDTM_26</b>  | <b>Multidrug resistance efflux pump.</b> |             |                 |
| acriflavine     | None                                     | AE005174    | 5460399-5461628 |
| chloramphenicol |                                          | AE008912    | 15997-17235     |
| norfloxacin     |                                          | AE014613    | 4718909-4720147 |
|                 |                                          | AE017220    | 4679723-4680961 |
|                 |                                          | AM933172    | 4599616-4600854 |
|                 |                                          | AM933173    | 4577405-4578643 |
|                 |                                          | AP009048    | 4571970-4573199 |
|                 |                                          | AP009240    | 4816251-4817480 |
|                 |                                          | CP000026    | 4511995-4512714 |
|                 |                                          | CP000034    | 4308427-4309656 |
|                 |                                          | CP000036    | 4441231-4442460 |
|                 |                                          | CP000800    | 4924194-4925423 |
|                 |                                          | CP000802    | 4572298-4573527 |
|                 |                                          | CP000822    | 3217399-3218583 |
|                 |                                          | CP000880    | 2987000-2988238 |
|                 |                                          | CP000886    | 4777583-4778821 |
|                 |                                          | CP000970    | 5000394-5001623 |
|                 |                                          | CP001063    | 4448737-4449966 |
|                 |                                          | CP001113    | 4741443-4742681 |
|                 |                                          | CP001120    | 4803394-4804632 |

| Resistance type | Required                                 | GenBank NO. | Position        |
|-----------------|------------------------------------------|-------------|-----------------|
|                 |                                          | CP001127    | 4635145-4636383 |
|                 |                                          | CP001138    | 4727765-4729003 |
|                 |                                          | CU928145    | 5085986-5087215 |
|                 |                                          | CU928158    | 3176307-3177536 |
|                 |                                          | CU928160    | 4627932-4629161 |
|                 |                                          | CU928161    | 4918219-4919448 |
| <b>MDTN_19</b>  | <b>Multidrug resistance efflux pump.</b> |             |                 |
| acriflavine     | mdto                                     | AE005174    | 5185751-5186779 |
| puromycin       | mdtp                                     | AE005674    | 4313098-4314126 |
| t_chloride      |                                          | AE014075    | 4862240-4863268 |
|                 |                                          | AP009048    | 4306560-4307588 |
|                 |                                          | AP009240    | 4574362-4575390 |
|                 |                                          | CP000036    | 4158895-4159923 |
|                 |                                          | CP000243    | 4577444-4578472 |
|                 |                                          | CP000247    | 4535806-4536834 |
|                 |                                          | CP000266    | 4258092-4259120 |
|                 |                                          | CP000800    | 4641599-4642627 |
|                 |                                          | CP000802    | 4334283-4335311 |
|                 |                                          | CP000880    | 3289836-3290864 |
|                 |                                          | CP000946    | 4329852-4330880 |
|                 |                                          | CP000970    | 4648689-4649717 |
|                 |                                          | CU928145    | 4694401-4695369 |
|                 |                                          | CU928162    | 4780476-4781423 |
|                 |                                          | CU928163    | 4795931-4796899 |
|                 |                                          | CU928164    | 4711451-4712419 |
|                 |                                          | FM180568    | 4653485-4654513 |
| <b>MDTO_15</b>  | <b>Multidrug resistance efflux pump.</b> |             |                 |
| acriflavine     | mdtn                                     | AE005174    | 5183700-5185748 |
| puromycin       | mdtp                                     | AE005674    | 4311056-4313095 |
| t_chloride      |                                          | AE014075    | 4860189-4862237 |
|                 |                                          | AP009240    | 4572311-4574359 |
|                 |                                          | CP000038    | 4526462-4528510 |
|                 |                                          | CP000243    | 4575393-4577441 |
|                 |                                          | CP000247    | 4533755-4535803 |
|                 |                                          | CP000266    | 4259123-4261162 |
|                 |                                          | CP000946    | 4330883-4332931 |
|                 |                                          | CP000970    | 4646638-4648686 |
|                 |                                          | CU928162    | 4778425-4780473 |
|                 |                                          | CU928163    | 4793880-4795928 |
|                 |                                          | CU928164    | 4709400-4711448 |
|                 |                                          | FM180568    | 4651434-4653482 |
|                 |                                          | U00006      | 166270-168231   |
| <b>MDTP_11</b>  | <b>Multidrug resistance efflux pump.</b> |             |                 |

| <b>Resistance type</b>       | <b>Required</b> | <b>GenBank NO.</b> | <b>Position</b> |
|------------------------------|-----------------|--------------------|-----------------|
| acriflavine                  | mdtn            | AE005174           | 5182237-5183700 |
| puromycin                    | mdto            | AE005674           | 4309593-4311056 |
| t_chloride                   |                 | AE014075           | 4858726-4860189 |
|                              |                 | CP000036           | 4156029-4156844 |
|                              |                 | CP000038           | 4524999-4526462 |
|                              |                 | CP000247           | 4532292-4533755 |
|                              |                 | CP000266           | 4261162-4262625 |
|                              |                 | CP000880           | 3292888-3294324 |
|                              |                 | CP000970           | 4645175-4646638 |
|                              |                 | CU928163           | 4792417-4793880 |
|                              |                 | FM180568           | 4649971-4651434 |
| <b>MECA_11</b>               |                 |                    |                 |
| beta_lactam                  | None            | AB033763           | 31390-33393     |
|                              |                 | AB047089           | 2520-4523       |
|                              |                 | AY820253           | 20-2014         |
|                              |                 | EF190335           | 1-2046          |
|                              |                 | EU790488           | 1-1944          |
|                              |                 | EU929080           | 1-2010          |
|                              |                 | X52593             | 141-2144        |
|                              |                 | Y09223             | 1640-3637       |
|                              |                 | Y13052             | 1318-3315       |
|                              |                 | Y13094             | 2045-4042       |
|                              |                 | Y13095             | 3485-5488       |
| <b>MECR1_10</b>              |                 |                    |                 |
| methicillin                  | None            | AB033763           | 30316-31290     |
|                              |                 | AB037671           | 22733-24229     |
|                              |                 | AB047089           | 4623-6377       |
|                              |                 | AB127982           | 25401-26207     |
|                              |                 | AB266531           | 2149-3123       |
|                              |                 | AF142100           | 108-650         |
|                              |                 | AJ810120           | 18462-20216     |
|                              |                 | AJ810122           | 2223-3059       |
|                              |                 | AM292304           | 16132-16959     |
|                              |                 | AY271717           | 15544-16431     |
| <b>MEFA_21</b>               |                 |                    |                 |
| <b>MLSB resistance types</b> |                 |                    |                 |
| methicillin                  | None            | AB011259           | 1-1206          |
|                              |                 | AB426620           | 20203-21417     |
|                              |                 | AF227520           | 3254-4468       |
|                              |                 | AJ715499           | 7979-9193       |
|                              |                 | AJ971089           | 22687-23901     |
|                              |                 | AM168138           | 3205-4419       |
|                              |                 | AY319932           | 93-1307         |
|                              |                 | AY355406           | 1-1215          |

| Resistance type  | Required                                       | GenBank NO. | Position        |
|------------------|------------------------------------------------|-------------|-----------------|
|                  |                                                | AY355407    | 1-1215          |
|                  |                                                | AY355409    | 1-1215          |
|                  |                                                | CP000003    | 1167544-1168758 |
|                  |                                                | CP000673    | 2693804-2695018 |
|                  |                                                | DQ016305    | 1-1215          |
|                  |                                                | DQ223647    | 2050-3261       |
|                  |                                                | DQ304772    | 45-1259         |
|                  |                                                | DQ304773    | 45-1259         |
|                  |                                                | DQ445269    | 46-1269         |
|                  |                                                | EU199784    | 1-1215          |
|                  |                                                | EU870853    | 1-1215          |
|                  |                                                | EU870854    | 1-1206          |
|                  |                                                | EU870856    | 1-1215          |
| <b>MEPA_8</b>    | <b>Multidrug resistance efflux pump.</b>       |             |                 |
| tigecycline      | None                                           | AC074316    | 44949-46301     |
|                  |                                                | AJ938182    | 334767-336119   |
|                  |                                                | AP008934    | 2203033-2204385 |
|                  |                                                | AP009324    | 380461-381813   |
|                  |                                                | AP009351    | 377048-378400   |
|                  |                                                | BA000033    | 360445-361797   |
|                  |                                                | BX571856    | 376571-377923   |
|                  |                                                | CP000703    | 417280-418632   |
| <b>MEXA_2</b>    | <b>multidrug resistance transporters types</b> |             |                 |
| aminoglycoside   | mexb                                           | AE004091    | 472024-473172   |
| beta_lactam      | oprm                                           | CP000744    | 538397-539545   |
| fluoroquinolone  |                                                |             |                 |
| tetracycline     |                                                |             |                 |
| tigecycline      |                                                |             |                 |
| <b>MEXB_7</b>    | <b>multidrug resistance transporters types</b> |             |                 |
| aminoglycoside   | oprm                                           | AE004091    | 473191-476328   |
| beta_lactam      | mexa                                           | AY349612    | 2083-5226       |
| fluoroquinolone  |                                                | CP000091    | 730353-733502   |
| tetracycline     |                                                | CP000353    | 333281-336424   |
| tigecycline      |                                                | CP000438    | 487942-491079   |
|                  |                                                | CP000744    | 539564-542701   |
|                  |                                                | FM209186    | 466932-470069   |
| <b>MEXC_1</b>    | <b>multidrug resistance transporters types</b> |             |                 |
| erythromycin     | oprj                                           | AL646053    | 411139-412293   |
| fluoroquinolone  | mexd                                           |             |                 |
| glycylcycline    |                                                |             |                 |
| roxithromycin    |                                                |             |                 |
| <b>MEXC_NW_2</b> | <b>multidrug resistance transporters types</b> |             |                 |
|                  |                                                | 2196567     | 938276-939430   |



| Resistance type | Required                                       | GenBank NO. | Position        |
|-----------------|------------------------------------------------|-------------|-----------------|
|                 |                                                | 2196568     | 1801114-1802268 |
| <b>MEXD_10</b>  | <b>multidrug resistance transporters types</b> |             |                 |
| erythromycin    | oprj                                           | AE004091    | 5151081-5154209 |
| fluoroquinolone | mexc                                           | AE015451    | 3214083-3217208 |
| glycylcycline   |                                                | AJ431260    | 11364-14504     |
| roxithromycin   |                                                | CP000094    | 3180483-3183611 |
|                 |                                                | CP000438    | 5423550-5426678 |
|                 |                                                | CP000744    | 5388993-5392121 |
|                 |                                                | CP000926    | 2715841-2718969 |
|                 |                                                | CT573326    | 3335963-3339088 |
|                 |                                                | FM209186    | 5486216-5489344 |
|                 |                                                | U57969      | 1486-4614       |
| <b>MEXE_5</b>   | <b>multidrug resistance transporters types</b> |             |                 |
| chloramphenicol | None                                           | AE004091    | 2808743-2809984 |
| fluoroquinolone |                                                | CP000438    | 2817367-2818608 |
|                 |                                                | CP000744    | 2769588-2770829 |
|                 |                                                | FM209186    | 3018644-3019885 |
|                 |                                                | X99514      | 173-1414        |
| <b>MEXF_15</b>  | <b>multidrug resistance transporters types</b> |             |                 |
| chloramphenicol | None                                           | AE004091    | 2810009-2813194 |
| fluoroquinolone |                                                | AE015451    | 3878163-3881339 |
|                 |                                                | AE016853    | 3484393-3487581 |
|                 |                                                | CP000058    | 2634961-2638149 |
|                 |                                                | CP000075    | 3557635-3560823 |
|                 |                                                | CP000076    | 3738424-3741600 |
|                 |                                                | CP000094    | 3048440-3051628 |
|                 |                                                | CP000438    | 2814157-2817342 |
|                 |                                                | CP000680    | 2405824-2409000 |
|                 |                                                | CP000712    | 2663996-2667172 |
|                 |                                                | CP000744    | 2766378-2769563 |
|                 |                                                | CP000926    | 2817874-2821050 |
|                 |                                                | CP000949    | 2718847-2722023 |
|                 |                                                | CT573326    | 2400999-2404175 |
|                 |                                                | FM209186    | 3015434-3018619 |
| <b>MEXH_5</b>   | <b>multidrug resistance transporters types</b> |             |                 |
|                 | opmd                                           | AE004091    | 4706410-4707519 |
|                 | mexi                                           | AY659082    | 1-1110          |
|                 |                                                | CP000438    | 819411-820520   |
|                 |                                                | CP000744    | 891696-892805   |
|                 |                                                | FM209186    | 785575-786684   |
| <b>MEXI_3</b>   | <b>multidrug resistance transporters types</b> |             |                 |
|                 | opmd                                           | AE004091    | 4707535-4710621 |
|                 | mexh                                           | CP000438    | 816309-819395   |

| Resistance type | Required                                       | GenBank NO. | Position        |
|-----------------|------------------------------------------------|-------------|-----------------|
|                 |                                                | CP000744    | 888597-891680   |
| <b>MEXW_11</b>  | <b>Multidrug resistance efflux pump.</b>       |             |                 |
| -               | oprM                                           | AE004091    | 4904647-4907700 |
|                 | mexV                                           | AE015451    | 1045334-1048375 |
|                 |                                                | CP000094    | 5067020-5070046 |
|                 |                                                | CP000438    | 5068199-5071252 |
|                 |                                                | CP000680    | 1362826-1365876 |
|                 |                                                | CP000712    | 1069916-1072957 |
|                 |                                                | CP000744    | 5098478-5101531 |
|                 |                                                | CP000926    | 5013615-5016620 |
|                 |                                                | CP000949    | 1070771-1073812 |
|                 |                                                | CT573326    | 1160238-1163270 |
|                 |                                                | FM209186    | 5238355-5241408 |
| <b>MEXX_7</b>   | <b>multidrug resistance transporters types</b> |             |                 |
| aminoglycoside  | mexY                                           | AB015853    | 146-1312        |
| glycylcycline   | oprM                                           | AE004091    | 2211325-2212512 |
|                 |                                                | AF073776    | 798-1985        |
|                 |                                                | AF147719    | 1020-2207       |
|                 |                                                | CP000438    | 3421686-3422873 |
|                 |                                                | CP000744    | 3379824-3381011 |
|                 |                                                | FM209186    | 3653310-3654497 |
| <b>MEXY_5</b>   | <b>multidrug resistance transporters types</b> |             |                 |
| aminoglycoside  | oprM                                           | AB015853    | 1331-4468       |
| glycylcycline   | mexX                                           | AE004091    | 2208172-2211306 |
|                 |                                                | AF073776    | 2004-5135       |
|                 |                                                | CP000438    | 3422892-3426026 |
|                 |                                                | CP000744    | 3381030-3384158 |
| <b>MFPA_3</b>   |                                                |             |                 |
| fluoroquinolone | None                                           | AE000516    | 3765243-3765791 |
|                 |                                                | CP000325    | 3174528-3175073 |
|                 |                                                | CP000854    | 1404168-1404713 |
| <b>MPHA_3</b>   | <b>MLSB resistance types</b>                   |             |                 |
| macrolide       | None                                           | AB038042    | 737-1627        |
|                 |                                                | AB262968    | 293-1183        |
|                 |                                                | U34344      | 432-1349        |
| <b>MPHB_1</b>   | <b>MLSB resistance types</b>                   |             |                 |
| macrolide       | None                                           | AB020531    | 4167-5072       |
| <b>MPHC_8</b>   | <b>MLSB resistance types</b>                   |             |                 |
| macrolide       | None                                           | AB013298    | 2296-3192       |
|                 |                                                | AB179623    | 20698-21594     |
|                 |                                                | AF167161    | 5665-6561       |
|                 |                                                | AM180066    | 789-1685        |
|                 |                                                | AM180067    | 687-1583        |

| Resistance type | Required                                       | GenBank NO. | Position        |
|-----------------|------------------------------------------------|-------------|-----------------|
|                 |                                                | AM180068    | 1-897           |
|                 |                                                | AM397631    | 1-897           |
|                 |                                                | AM397632    | 1-897           |
| <b>MSRA_5</b>   | <b>MLSB resistance types</b>                   |             |                 |
| lincosamide     | None                                           | AB013298    | 487-1950        |
| macrolide       |                                                | AB016613    | 2005-3468       |
| streptogramin_b |                                                | AB179623    | 21939-23402     |
|                 |                                                | EF092840    | 7-972           |
|                 |                                                | M81802      | 1-621           |
| <b>NORM_5</b>   | <b>Multidrug resistance efflux pump.</b>       |             |                 |
| ciprofloxacin   | None                                           | AB010463    | 833-2200        |
| kanamycin       |                                                | AE016795    | 2596647-2598014 |
| norfloxacin     |                                                | BA000031    | 1590885-1592252 |
| streptomycin    |                                                | BA000037    | 1785190-1786557 |
| tigecycline     |                                                | CP000789    | 2236842-2238209 |
| <b>OLEB_1</b>   | <b>MLSB resistance types</b>                   |             |                 |
| lincosamide     | None                                           | L36601      | 1421-3127       |
| macrolide       |                                                |             |                 |
| streptogramin_b |                                                |             |                 |
| <b>OPCM_9</b>   | <b>multidrug resistance transporters types</b> |             |                 |
| chloramphenicol | ceob                                           | AM747721    | 2891218-2892756 |
|                 | ceoa                                           | AP009386    | 2206923-2208434 |
|                 |                                                | CP000152    | 319327-320859   |
|                 |                                                | CP000379    | 36503-38041     |
|                 |                                                | CP000441    | 1683324-1684880 |
|                 |                                                | CP000615    | 314240-315790   |
|                 |                                                | CP000869    | 266870-268381   |
|                 |                                                | CP000959    | 1952256-1953794 |
|                 |                                                | CP001026    | 2429514-2431052 |
| <b>OPRA_3</b>   | <b>multidrug resistance transporters types</b> |             |                 |
| acriflavine     | amrb                                           | BX571965    | 2146274-2147821 |
| aminoglycoside  | amra                                           | CP000086    | 2794581-2796212 |
| macrolide       |                                                | CP000124    | 2226868-2228415 |
| <b>OPRD_7</b>   | <b>multidrug resistance transporters types</b> |             |                 |
| -               | -                                              | AE004091    | 1043986-1045314 |
|                 |                                                | AY528673    | 1-1323          |
|                 |                                                | CP000438    | 4606220-4607548 |
|                 |                                                | CP000744    | 4674381-4675703 |
|                 |                                                | EU000222    | 1222-2526       |
|                 |                                                | FM207961    | 1-1323          |
|                 |                                                | FM209186    | 4793086-4794399 |
| <b>OPRJ_5</b>   | <b>multidrug resistance transporters types</b> |             |                 |
| erythromycin    | mexd                                           | AE004091    | 5149636-5151072 |

| <b>Resistance type</b> | <b>Required</b>                                | <b>GenBank NO.</b> | <b>Position</b> |
|------------------------|------------------------------------------------|--------------------|-----------------|
| fluoroquinolone        | mexc                                           | CP000438           | 5422105-5423541 |
| glycylcycline          |                                                | CP000744           | 5387560-5388984 |
| roxithromycin          |                                                | FM209186           | 5484771-5486216 |
|                        |                                                | U57969             | 4623-6059       |
| <b>OPRM_5</b>          | <b>multidrug resistance transporters types</b> |                    |                 |
| aminoglycoside         | mexk                                           | AB011381           | 1-1455          |
| beta_lactam            | mexy                                           | CP000438           | 491084-492538   |
| fluoroquinolone        | mexb                                           | CP000744           | 542706-544160   |
| tetracycline           | mexw                                           | FM209186           | 470074-471528   |
| tigecycline            | mexx                                           | L23839             | 12-1409         |
|                        | mexj                                           |                    |                 |
|                        | mexa                                           |                    |                 |
|                        | mexv                                           |                    |                 |
| <b>OPRN_4</b>          | <b>multidrug resistance transporters types</b> |                    |                 |
| chloramphenicol        | mexf                                           | AE004091           | 2813194-2814609 |
| fluoroquinolone        | mexe                                           | CP000438           | 2812742-2814157 |
|                        |                                                | CP000744           | 2764963-2766378 |
|                        |                                                | X99514             | 4624-6039       |
| <b>OTRA_1</b>          | <b>aminoglycoside resistance types</b>         |                    |                 |
| tetracycline           | None                                           | DQ143963           | 22257-24245     |
| <b>OTRB_1</b>          | <b>aminoglycoside resistance types</b>         |                    |                 |
| tetracycline           | None                                           | AF061335           | 1-1608          |
| <b>PBP1A_5</b>         |                                                |                    |                 |
| penicillin             | None                                           | CP000057           | 527266-529857   |
|                        |                                                | CP000671           | 151164-153761   |
|                        |                                                | CP000672           | 984333-986924   |
|                        |                                                | L42023             | 460645-463236   |
|                        |                                                | M62809             | 1071-3662       |
| <b>PBP1B_1</b>         |                                                |                    |                 |
| penicillin             | None                                           | BA000003           | 216262-218541   |
| <b>PBP2B_103</b>       |                                                |                    |                 |
| penicillin             | None                                           | AB071984           | 70-1815         |
|                        |                                                | AE002098           | 419829-421571   |
|                        |                                                | AE004969           | 1515419-1517164 |
|                        |                                                | AF515059           | 25-1767         |
|                        |                                                | AF515060           | 25-1767         |
|                        |                                                | AF515061           | 25-1767         |
|                        |                                                | AF515063           | 25-1767         |
|                        |                                                | AF515064           | 25-1767         |
|                        |                                                | AF515065           | 25-1767         |
|                        |                                                | AF515066           | 25-1767         |
|                        |                                                | AF515067           | 25-1767         |
|                        |                                                | AF515068           | 25-1767         |

| <b>Resistance type</b> | <b>Required</b> | <b>GenBank NO.</b> | <b>Position</b> |
|------------------------|-----------------|--------------------|-----------------|
|                        |                 | AF515069           | 25-1767         |
|                        |                 | AF515071           | 25-1770         |
|                        |                 | AF515072           | 25-1767         |
|                        |                 | AF515073           | 25-1767         |
|                        |                 | AF515074           | 25-1767         |
|                        |                 | AF515075           | 25-1767         |
|                        |                 | AF515076           | 25-1767         |
|                        |                 | AF515077           | 25-1770         |
|                        |                 | AF515078           | 25-1770         |
|                        |                 | AF515080           | 25-1770         |
|                        |                 | AF515081           | 25-1770         |
|                        |                 | AF515082           | 25-1767         |
|                        |                 | AF515083           | 25-1770         |
|                        |                 | AF515084           | 25-1770         |
|                        |                 | AF515085           | 25-1770         |
|                        |                 | AF515087           | 25-1770         |
|                        |                 | AF515088           | 25-1767         |
|                        |                 | AF515089           | 25-1767         |
|                        |                 | AF515090           | 25-1767         |
|                        |                 | AF515091           | 25-1767         |
|                        |                 | AF515092           | 25-1767         |
|                        |                 | AF515093           | 25-1773         |
|                        |                 | AF515094           | 25-1767         |
|                        |                 | AF515095           | 25-1767         |
|                        |                 | AF515097           | 25-1767         |
|                        |                 | AF515098           | 25-1767         |
|                        |                 | AF515099           | 25-1767         |
|                        |                 | AF515104           | 25-1767         |
|                        |                 | AF515105           | 25-1767         |
|                        |                 | AF515106           | 25-1767         |
|                        |                 | AF515107           | 25-1767         |
|                        |                 | AF515110           | 25-1767         |
|                        |                 | AF515111           | 25-1767         |
|                        |                 | AF515112           | 25-1767         |
|                        |                 | AF515113           | 25-1767         |
|                        |                 | AF515114           | 25-1767         |
|                        |                 | AF515115           | 25-1767         |
|                        |                 | AF515116           | 25-1767         |
|                        |                 | AF515117           | 25-1767         |
|                        |                 | AF515118           | 25-1767         |
|                        |                 | AJ549308           | 1-1746          |
|                        |                 | AJ549309           | 1-1746          |
|                        |                 | AJ549310           | 1-1746          |

| <b>Resistance type</b> | <b>Required</b> | <b>GenBank NO.</b> | <b>Position</b> |
|------------------------|-----------------|--------------------|-----------------|
|                        |                 | AJ549311           | 1-1746          |
|                        |                 | AJ549314           | 1-1746          |
|                        |                 | AJ549316           | 1-1743          |
|                        |                 | AL157959           | 2020627-2022369 |
|                        |                 | AM421808           | 1787549-1789291 |
|                        |                 | AY127596           | 1-1743          |
|                        |                 | AY127598           | 1-1743          |
|                        |                 | AY127599           | 1-1743          |
|                        |                 | AY127605           | 1-1743          |
|                        |                 | AY127618           | 1-1743          |
|                        |                 | AY127620           | 1-1743          |
|                        |                 | AY127624           | 1-1743          |
|                        |                 | AY127631           | 1-1743          |
|                        |                 | AY127633           | 1-1743          |
|                        |                 | AY127634           | 1-1743          |
|                        |                 | AY127635           | 1-1743          |
|                        |                 | AY127644           | 1-1746          |
|                        |                 | AY127645           | 1-1746          |
|                        |                 | AY127647           | 1-1746          |
|                        |                 | AY127648           | 1-1746          |
|                        |                 | AY127649           | 1-1746          |
|                        |                 | AY127650           | 1-1746          |
|                        |                 | AY127651           | 1-1743          |
|                        |                 | AY127652           | 1-1746          |
|                        |                 | AY127653           | 1-1746          |
|                        |                 | AY127654           | 1-1746          |
|                        |                 | AY127657           | 1-1746          |
|                        |                 | AY127658           | 1-1746          |
|                        |                 | AY127660           | 1-1743          |
|                        |                 | AY127661           | 1-1743          |
|                        |                 | AY127662           | 1-1746          |
|                        |                 | AY127663           | 1-1746          |
|                        |                 | AY127666           | 1-1743          |
|                        |                 | AY127667           | 1-1743          |
|                        |                 | AY127668           | 1-1746          |
|                        |                 | AY127670           | 1-1743          |
|                        |                 | AY461439           | 1-1749          |
|                        |                 | AY461440           | 1-1749          |
|                        |                 | CP000381           | 1776644-1778386 |
|                        |                 | M26644             | 25-1770         |
|                        |                 | M32091             | 103-1845        |
|                        |                 | X07469             | 25-1773         |
|                        |                 | X59624             | 25-1776         |

| Resistance type  | Required | GenBank NO. | Position      |
|------------------|----------|-------------|---------------|
|                  |          | X59627      | 25-1770       |
|                  |          | X59631      | 25-1770       |
|                  |          | X59633      | 25-1767       |
|                  |          | X59634      | 25-1770       |
|                  |          | X76285      | 25-1767       |
| <b>PBP2X_127</b> |          |             |               |
| penicillin       | None     | AB119913    | 1-2250        |
|                  |          | AB119914    | 1-2250        |
|                  |          | AB119916    | 1-2250        |
|                  |          | AB119917    | 1-2250        |
|                  |          | AB119918    | 1-2250        |
|                  |          | AB119919    | 1-2250        |
|                  |          | AB119921    | 1-2250        |
|                  |          | AB119922    | 1-2250        |
|                  |          | AB119924    | 1-2250        |
|                  |          | AB119925    | 1-2250        |
|                  |          | AB119926    | 1-2250        |
|                  |          | AB119927    | 1-2250        |
|                  |          | AB119929    | 1-2250        |
|                  |          | AB119930    | 1-2250        |
|                  |          | AB119932    | 1-2250        |
|                  |          | AB119934    | 1-2250        |
|                  |          | AB119935    | 1-2250        |
|                  |          | AB119937    | 1-2250        |
|                  |          | AB119938    | 1-2250        |
|                  |          | AB119939    | 1-2250        |
|                  |          | AB119940    | 1-2250        |
|                  |          | AB119944    | 1-2250        |
|                  |          | AB119947    | 1-2250        |
|                  |          | AB119948    | 1-2250        |
|                  |          | AB119950    | 1-2250        |
|                  |          | AB119951    | 1-2250        |
|                  |          | AB119952    | 1-2250        |
|                  |          | AB190807    | 1-2250        |
|                  |          | AE005672    | 306880-309129 |
|                  |          | AE008411    | 2263-4512     |
|                  |          | AF068903    | 2417-4666     |
|                  |          | AF210754    | 1-2250        |
|                  |          | AF210756    | 1-2250        |
|                  |          | AF210757    | 1-2250        |
|                  |          | AF210758    | 1-2250        |
|                  |          | AF210759    | 1-2250        |
|                  |          | AF210760    | 1-2250        |

| <b>Resistance type</b> | <b>Required</b> | <b>GenBank NO.</b> | <b>Position</b> |
|------------------------|-----------------|--------------------|-----------------|
|                        |                 | AF468152           | 1-2250          |
|                        |                 | AM779338           | 193-2442        |
|                        |                 | AM779339           | 193-2442        |
|                        |                 | AM779340           | 193-2442        |
|                        |                 | AM779343           | 193-2442        |
|                        |                 | AM779344           | 193-2442        |
|                        |                 | AM779345           | 193-2442        |
|                        |                 | AM779346           | 193-2442        |
|                        |                 | AM779348           | 193-2442        |
|                        |                 | AM779349           | 193-2442        |
|                        |                 | AM779351           | 193-2442        |
|                        |                 | AM779355           | 193-2442        |
|                        |                 | AM779356           | 193-2442        |
|                        |                 | AM779357           | 193-2442        |
|                        |                 | AM779360           | 193-2442        |
|                        |                 | AM779361           | 193-2442        |
|                        |                 | CP000410           | 302310-304559   |
|                        |                 | EF501483           | 1-2196          |
|                        |                 | EF501485           | 1-2196          |
|                        |                 | EF501486           | 1-2196          |
|                        |                 | EF501488           | 1-2196          |
|                        |                 | EF501490           | 1-2196          |
|                        |                 | EF501491           | 1-2187          |
|                        |                 | EF501493           | 1-2187          |
|                        |                 | EF501494           | 1-2187          |
|                        |                 | EF501497           | 1-2187          |
|                        |                 | EF501505           | 1-2196          |
|                        |                 | EF501507           | 1-2187          |
|                        |                 | EF501509           | 1-2196          |
|                        |                 | EF501514           | 1-2187          |
|                        |                 | EF501518           | 1-2187          |
|                        |                 | EF501521           | 1-2184          |
|                        |                 | EF501523           | 1-2196          |
|                        |                 | EF501533           | 1-2196          |
|                        |                 | EF501535           | 1-2196          |
|                        |                 | EF501538           | 1-2196          |
|                        |                 | EF501540           | 1-2196          |
|                        |                 | EF501547           | 1-2187          |
|                        |                 | EF501557           | 1-2196          |
|                        |                 | EF501561           | 1-2196          |
|                        |                 | EF501574           | 1-2187          |
|                        |                 | EF501578           | 1-2187          |
|                        |                 | EF501580           | 1-2196          |



| <b>Resistance type</b> | <b>Required</b> | <b>GenBank NO.</b> | <b>Position</b> |
|------------------------|-----------------|--------------------|-----------------|
|                        |                 | EF501588           | 1-2187          |
|                        |                 | EF501592           | 1-2196          |
|                        |                 | EF501593           | 1-2196          |
|                        |                 | EF501602           | 1-2187          |
|                        |                 | EF501603           | 1-2187          |
|                        |                 | EF501605           | 1-2196          |
|                        |                 | EF501614           | 1-2196          |
|                        |                 | EF501618           | 1-2196          |
|                        |                 | EF501631           | 1-2187          |
|                        |                 | EF501632           | 1-2190          |
|                        |                 | EF501652           | 1-2187          |
|                        |                 | EF501657           | 1-2196          |
|                        |                 | EF501662           | 1-2187          |
|                        |                 | EF501663           | 1-2187          |
|                        |                 | EF501670           | 1-2196          |
|                        |                 | EF501671           | 1-2196          |
|                        |                 | EF501674           | 1-2196          |
|                        |                 | EF501677           | 1-2196          |
|                        |                 | EF501686           | 1-2196          |
|                        |                 | EF501692           | 1-2196          |
|                        |                 | EF501696           | 1-2196          |
|                        |                 | EU034015           | 1-2250          |
|                        |                 | EU034016           | 1-2250          |
|                        |                 | EU034018           | 1-2250          |
|                        |                 | EU378139           | 1-2187          |
|                        |                 | EU378144           | 1-2187          |
|                        |                 | EU378151           | 1-2187          |
|                        |                 | EU378174           | 1-2187          |
|                        |                 | EU378179           | 1-2187          |
|                        |                 | EU378184           | 1-2187          |
|                        |                 | EU378187           | 1-2187          |
|                        |                 | EU378190           | 1-2187          |
|                        |                 | EU378216           | 1-2187          |
|                        |                 | EU378234           | 1-2187          |
|                        |                 | EU378243           | 1-2187          |
|                        |                 | EU378244           | 1-2187          |
|                        |                 | EU378253           | 1-2187          |
|                        |                 | EU378255           | 1-2187          |
|                        |                 | EU378256           | 1-2187          |
|                        |                 | EU378259           | 1-2187          |
|                        |                 | EU378260           | 1-2187          |
|                        |                 | EU378264           | 1-2187          |
|                        |                 | EU378276           | 1-2187          |

| Resistance type                                       | Required | GenBank NO. | Position        |
|-------------------------------------------------------|----------|-------------|-----------------|
|                                                       |          | EU378277    | 1-2187          |
|                                                       |          | EU378281    | 1-2187          |
|                                                       |          | EU378284    | 1-2187          |
|                                                       |          | EU378285    | 1-2187          |
| <b>PBP2_9</b>                                         |          |             |                 |
| penicillin                                            | None     | AE008785    | 7506-9374       |
|                                                       |          | AE014613    | 1055134-1057002 |
|                                                       |          | AE017220    | 2027099-2028967 |
|                                                       |          | AM933172    | 1188677-1190545 |
|                                                       |          | CP000822    | 1063443-1065281 |
|                                                       |          | CP001113    | 2009461-2011329 |
|                                                       |          | CP001120    | 2052859-2054727 |
|                                                       |          | CP001127    | 1982399-1984267 |
|                                                       |          | CP001144    | 1312040-1313908 |
| <b>PMRA_2</b> multidrug resistance transporters types |          |             |                 |
| ciprofloxacin                                         | None     | AE005672    | 918103-919299   |
| norfloxacin                                           |          | CP001015    | 864389-865585   |
| <b>QACA_2</b> Multidrug efflux pump                   |          |             |                 |
| qa_compound                                           | qacb     | AB255366    | 18992-20533     |
|                                                       |          | EU714008    | 13-1554         |
| <b>QAC_1</b> multidrug resistance transporters types  |          |             |                 |
| qa_compound                                           | None     | U81980      | 1927-2247       |
| <b>QNRA_20</b>                                        |          |             |                 |
| fluoroquinolone                                       | None     | AB325578    | 1-654           |
|                                                       |          | AB469045    | 5736-6389       |
|                                                       |          | AM295981    | 3051-3704       |
|                                                       |          | AY906856    | 1-654           |
|                                                       |          | AY995191    | 2-508           |
|                                                       |          | DQ058661    | 1-654           |
|                                                       |          | DQ058662    | 1-654           |
|                                                       |          | DQ058663    | 1-654           |
|                                                       |          | DQ151889    | 1-654           |
|                                                       |          | DQ435306    | 1-654           |
|                                                       |          | EF514353    | 174-623         |
|                                                       |          | EF514354    | 1-621           |
|                                                       |          | EF514355    | 1-621           |
|                                                       |          | EF514356    | 1-624           |
|                                                       |          | EF514357    | 2-625           |
|                                                       |          | EF514359    | 2-625           |
|                                                       |          | EU247883    | 2-577           |
|                                                       |          | EU279427    | 1-543           |
|                                                       |          | EU443839    | 1-654           |
|                                                       |          | EU722351    | 3117-3770       |

| <b>Resistance type</b>                                | <b>Required</b> | <b>GenBank NO.</b> | <b>Position</b> |
|-------------------------------------------------------|-----------------|--------------------|-----------------|
| <b>QNRB_32</b>                                        |                 |                    |                 |
| fluoroquinolone                                       | None            | AB281054           | 1-642           |
|                                                       |                 | AB379831           | 1-678           |
|                                                       |                 | AJ609296           | 9414-10070      |
|                                                       |                 | AJ971343           | 13366-14010     |
|                                                       |                 | AJ971344           | 16315-16959     |
|                                                       |                 | AM774474           | 2417-3076       |
|                                                       |                 | AM919398           | 1-678           |
|                                                       |                 | AM919399           | 1-678           |
|                                                       |                 | CP000826           | 2251832-2252473 |
|                                                       |                 | DQ303919           | 1-678           |
|                                                       |                 | DQ303920           | 1-678           |
|                                                       |                 | DQ303921           | 1-645           |
|                                                       |                 | DQ351241           | 1-678           |
|                                                       |                 | DQ631414           | 1-678           |
|                                                       |                 | EF488762           | 1-642           |
|                                                       |                 | EF517946           | 1-678           |
|                                                       |                 | EF523819           | 1-678           |
|                                                       |                 | EF526508           | 1-642           |
|                                                       |                 | EF636461           | 11590-12267     |
|                                                       |                 | EF653270           | 1-645           |
|                                                       |                 | EF660200           | 2751-3425       |
|                                                       |                 | EF667294           | 2461-3138       |
|                                                       |                 | EU043312           | 1-642           |
|                                                       |                 | EU136182           | 1-678           |
|                                                       |                 | EU136183           | 1-678           |
|                                                       |                 | EU273755           | 1-678           |
|                                                       |                 | EU273757           | 1-678           |
|                                                       |                 | EU302865           | 1-678           |
|                                                       |                 | EU432277           | 1-642           |
|                                                       |                 | EU443840           | 4-681           |
|                                                       |                 | EU523120           | 2070-2747       |
|                                                       |                 | EU624315           | 348-1025        |
| <b>QNRS_4</b>                                         |                 |                    |                 |
| fluoroquinolone                                       | None            | AB178643           | 1377-2030       |
|                                                       |                 | DQ460733           | 7814-8467       |
|                                                       |                 | EU077611           | 3-653           |
|                                                       |                 | FM954973           | 76628-77281     |
| <b>ROSA_6</b> multidrug resistance transporters types |                 |                    |                 |
| fosmidomycin                                          | rosb            | AE009952           | 1225489-1226700 |
|                                                       |                 | AL590842           | 3449065-3450276 |
|                                                       |                 | CP000668           | 3097677-3098429 |
|                                                       |                 | CP000720           | 3413089-3414300 |

| Resistance type                                       | Required     | GenBank NO.                                                          | Position                                                                                |
|-------------------------------------------------------|--------------|----------------------------------------------------------------------|-----------------------------------------------------------------------------------------|
|                                                       |              | CP000826<br>U46859                                                   | 1262988-1264205<br>24298-25527                                                          |
| <b>ROSB_5</b>                                         |              |                                                                      |                                                                                         |
| fosmidomycin                                          | rosa         | AE009952<br>AL590842<br>AM286415<br>CP000826<br>U46859               | 1223563-1225251<br>3450514-3452202<br>3335753-3337441<br>1261051-1262739<br>22369-24057 |
| <b>SMEA_3</b> Multidrug resistance efflux pump.       |              |                                                                      |                                                                                         |
| fluoroquinolone                                       | smec<br>smeb | AF173226<br>AM743169<br>CP001111                                     | 2559-3752<br>4595218-4596411<br>4324296-4325489                                         |
| <b>SMEB_3</b> Multidrug resistance efflux pump.       |              |                                                                      |                                                                                         |
| fluoroquinolone                                       | smec<br>smea | AF173226<br>AM743169<br>CP001111                                     | 3768-6914<br>4592056-4595202<br>4321134-4324280                                         |
| <b>SMEC_3</b> multidrug resistance transporters types |              |                                                                      |                                                                                         |
| fluoroquinolone                                       | smea<br>smeb | AF173226<br>AM743169<br>CP001111                                     | 6914-8326<br>4590644-4592056<br>4319722-4321134                                         |
| <b>SMED_6</b> Multidrug resistance efflux pump.       |              |                                                                      |                                                                                         |
| fluoroquinolone                                       | smef<br>smee | AJ252200<br>AJ746241<br>AJ746242<br>AJ746243<br>AM743169<br>CP001111 | 82-1263<br>2401-3582<br>1882-3063<br>2358-3539<br>4178972-4180153<br>3903907-3905022    |
| <b>SMEE_6</b> Multidrug resistance efflux pump.       |              |                                                                      |                                                                                         |
| fluoroquinolone                                       | smef<br>smed | AJ252200<br>AJ746241<br>AJ746242<br>AJ746243<br>AM743169<br>CP001111 | 1279-4398<br>3598-6717<br>3079-6192<br>3555-6674<br>4175837-4178956<br>3900709-3903828  |
| <b>SMEF_6</b> multidrug resistance transporters types |              |                                                                      |                                                                                         |
| fluoroquinolone                                       | smee<br>smed | AJ252200<br>AJ746241<br>AJ746242<br>AJ746243<br>AM743169<br>CP001111 | 4494-5891<br>6831-8228<br>6293-7678<br>6770-8164<br>4174347-4175741<br>3899198-3900595  |
| <b>SRMB_2</b> MLSB resistance types                   |              |                                                                      |                                                                                         |
| lincosamide                                           | None         | AM709784                                                             | 12737-14386                                                                             |

| <b>Resistance type</b>       | <b>Required</b> | <b>GenBank NO.</b>                                                                                                                           | <b>Position</b>                                                                                                                                  |
|------------------------------|-----------------|----------------------------------------------------------------------------------------------------------------------------------------------|--------------------------------------------------------------------------------------------------------------------------------------------------|
| macrolide<br>streptogramin_b |                 | X63451                                                                                                                                       | 558-2207                                                                                                                                         |
| <b>STA_1</b>                 |                 |                                                                                                                                              |                                                                                                                                                  |
| streptothricin               | None            | M16183                                                                                                                                       | 530-1096                                                                                                                                         |
| <b>STR_4</b>                 |                 |                                                                                                                                              |                                                                                                                                                  |
| streptomycin                 | None            | AY604739<br>AY939911<br>X06627<br>X92946                                                                                                     | 150-920<br>8065-8724<br>1-771<br>18063-18833                                                                                                     |
| <b>SUL1_12</b>               |                 |                                                                                                                                              |                                                                                                                                                  |
| sulfonamide                  | None            | AB061794<br>AB281182<br>AF071555<br>AF550679<br>AJ294721<br>AJ515707<br>AJ517791<br>AJ621187<br>AM993099<br>DQ143913<br>EF667294<br>FJ187822 | 2894-3730<br>850-1683<br>3257-4225<br>79636-80472<br>874-1707<br>4177-4854<br>7775-8611<br>3369-4205<br>2-796<br>3694-4530<br>1089-1925<br>2-793 |
| <b>SUL2_8</b>                |                 |                                                                                                                                              |                                                                                                                                                  |
| sulfonamide                  | None            | AB076707<br>AB109805<br>AB114188<br>AF100173<br>AF303375<br>AM183225<br>EF062588<br>FJ200242                                                 | 2-811<br>887-1699<br>19434-20246<br>9444-10229<br>127-939<br>10491-11306<br>7-741<br>2-649                                                       |
| <b>SUL3_5</b>                |                 |                                                                                                                                              |                                                                                                                                                  |
| sulfonamide                  | None            | AJ459418<br>AY494779<br>AY617070<br>AY816216<br>EF051037                                                                                     | 2979-3767<br>172-894<br>1-495<br>7064-7759<br>6309-7085                                                                                          |
| <b>TCMA_3</b>                |                 |                                                                                                                                              |                                                                                                                                                  |
| tetracenomycin_c             | None            | AL939112<br>BA000030<br>M80674                                                                                                               | 119810-121417<br>7001572-7003191<br>878-2491                                                                                                     |
| <b>TCR3_1</b>                |                 |                                                                                                                                              |                                                                                                                                                  |
| tetracycline                 | None            | D38215                                                                                                                                       | 516-2051                                                                                                                                         |

| <b>Resistance type</b> | <b>Required</b> | <b>GenBank NO.</b> | <b>Position</b> |
|------------------------|-----------------|--------------------|-----------------|
| <b>TET30_1</b>         |                 |                    |                 |
| tetracycline           | None            | AE007870           | 1328325-1329506 |
| <b>TET31_1</b>         |                 |                    |                 |
| tetracycline           | None            | AJ250203           | 1651-2880       |
| <b>TET32_2</b>         |                 |                    |                 |
| tetracycline           | None            | AJ295238           | 164-2080        |
|                        |                 | DQ647324           | 181-2097        |
| <b>TET33_2</b>         |                 |                    |                 |
| tetracycline           | None            | AJ420072           | 22940-24160     |
|                        |                 | DQ390458           | 31992-33212     |
| <b>TET34_6</b>         |                 |                    |                 |
| tetracycline           | None            | AB061440           | 309-770         |
|                        |                 | AE016795           | 317374-317835   |
|                        |                 | BA000031           | 706791-707252   |
|                        |                 | BA000037           | 860631-861092   |
|                        |                 | CP000789           | 1179731-1180192 |
|                        |                 | FM954972           | 2588371-2588832 |
| <b>TET36_2</b>         |                 |                    |                 |
| tetracycline           | None            | AJ514254           | 2534-4453       |
|                        |                 | AY265739           | 4-1302          |
| <b>TET37_1</b>         |                 |                    |                 |
| tetracycline           | None            | AF540889           | 1-324           |
| <b>TET38_2</b>         |                 |                    |                 |
| tetracycline           | None            | AJ938182           | 95236-96585     |
|                        |                 | BX571856           | 152865-154214   |
| <b>TET39_1</b>         |                 |                    |                 |
| tetracycline           | None            | AY743590           | 749-1933        |
| <b>TET40_1</b>         |                 |                    |                 |
| tetracycline           | None            | AJ295238           | 2134-3351       |
| <b>TETA_10</b>         |                 |                    |                 |
| tetracycline           | None            | AB027254           | 22006-23250     |
|                        |                 | AB366441           | 40202-41446     |
|                        |                 | AF497970           | 1155-2426       |
|                        |                 | AY509004           | 2544-3788       |
|                        |                 | AY903253           | 1-1263          |
|                        |                 | CP000604           | 27347-28618     |
|                        |                 | EF633507           | 1785-3029       |
|                        |                 | EF682136           | 4393-5589       |
|                        |                 | FJ151627           | 9339-10511      |
|                        |                 | U75324             | 535-1779        |
| <b>TETB_6</b>          |                 |                    |                 |
| tetracycline           | None            | AB084245           | 519-1721        |

| Resistance type | Required | GenBank NO. | Position        |
|-----------------|----------|-------------|-----------------|
|                 |          | AB089588    | 1-1203          |
|                 |          | AB366440    | 76569-77771     |
|                 |          | AC006650    | 12105-12875     |
|                 |          | AF217317    | 6242-7444       |
|                 |          | AY048738    | 1332-2534       |
| <b>TETC_11</b>  |          |             |                 |
| tetracycline    | None     | AB057644    | 3006-4193       |
|                 |          | AB089596    | 1-1188          |
|                 |          | AF361441    | 3123-4310       |
|                 |          | AP009241    | 7255-8442       |
|                 |          | AY043298    | 4010-5197       |
|                 |          | AY428550    | 3547-4734       |
|                 |          | AY428551    | 1540-2727       |
|                 |          | DQ157769    | 1749-2936       |
|                 |          | DQ517526    | 89606-90793     |
|                 |          | EU496095    | 90-1277         |
|                 |          | FJ158001    | 58-1245         |
| <b>TETD_5</b>   |          |             |                 |
| tetracycline    | None     | AB089599    | 1-1182          |
|                 |          | AB262967    | 2011-3192       |
|                 |          | AF467072    | 173-1354        |
|                 |          | EF471994    | 10-1008         |
|                 |          | Y19115      | 1-1119          |
| <b>TETE_3</b>   |          |             |                 |
| tetracycline    | None     | AJ289103    | 3303-4517       |
|                 |          | CP000645    | 4109-5323       |
|                 |          | L06940      | 21-1235         |
| <b>TETG_5</b>   |          |             |                 |
| tetracycline    | None     | AB089603    | 49-1173         |
|                 |          | AF071555    | 6644-7768       |
|                 |          | AJ276217    | 25-1140         |
|                 |          | CU459141    | 3671435-3672559 |
|                 |          | Y19118      | 25-1140         |
| <b>TETH_3</b>   |          |             |                 |
| tetracycline    | None     | AJ245947    | 986-2161        |
|                 |          | AJ487672    | 1-1074          |
|                 |          | AJ514834    | 1876-3048       |
| <b>TETJ_2</b>   |          |             |                 |
| tetracycline    | None     | AF038993    | 10842277        |
|                 |          | AM942759    | 2621559-2622752 |
| <b>TETK_2</b>   |          |             |                 |
| tetracycline    | None     | AE015930    | 36-1412         |
|                 |          | AJ888003    | 117-1493        |

| <b>Resistance type</b> | <b>Required</b> | <b>GenBank NO.</b> | <b>Position</b> |
|------------------------|-----------------|--------------------|-----------------|
| <b>TETL_9</b>          |                 |                    |                 |
| tetracycline           | None            | AB117035           | 2493-3866       |
|                        |                 | AJ277764           | 118-1491        |
|                        |                 | AJ966516           | 3487-4860       |
|                        |                 | AY359464           | 454-1773        |
|                        |                 | D12567             | 546-1916        |
|                        |                 | D26185             | 35680-37053     |
|                        |                 | DQ367664           | 1603-2982       |
|                        |                 | X15669             | 1736-3109       |
|                        |                 | X60828             | 168-1541        |
| <b>TETM_51</b>         |                 |                    |                 |
| tetracycline           | None            | AB039845           | 26-1942         |
|                        |                 | AB054984           | 1-1917          |
|                        |                 | AB426620           | 14972-16888     |
|                        |                 | AB468159           | 15137-17053     |
|                        |                 | AE009948           | 927458-929374   |
|                        |                 | AF333235           | 14651-16567     |
|                        |                 | AF376746           | 5901-7817       |
|                        |                 | AF440277           | 7327-9243       |
|                        |                 | AF491293           | 13-1929         |
|                        |                 | AJ580976           | 632-2548        |
|                        |                 | AJ580977           | 632-2548        |
|                        |                 | AJ580978           | 632-2548        |
|                        |                 | AJ971089           | 13381-15297     |
|                        |                 | AJ973137           | 200-2116        |
|                        |                 | AJ973139           | 200-2116        |
|                        |                 | AJ973140           | 325-2241        |
|                        |                 | AJ973141           | 325-2241        |
|                        |                 | AM180355           | 600034-601950   |
|                        |                 | AM411624           | 420-2336        |
|                        |                 | AM889142           | 1618-3534       |
|                        |                 | AY047229           | 1450-3366       |
|                        |                 | AY057892           | 2-1861          |
|                        |                 | AY057893           | 2-1861          |
|                        |                 | AY057894           | 2-1861          |
|                        |                 | AY466395           | 4-1920          |
|                        |                 | AY898750           | 14971-16887     |
|                        |                 | CP000407           | 892243-894159   |
|                        |                 | CP000936           | 1306028-1307944 |
|                        |                 | CP001015           | 1192420-1194336 |
|                        |                 | CP001033           | 171720-173636   |
|                        |                 | DQ206711           | 21-1937         |
|                        |                 | DQ223241           | 1-1917          |



| Resistance type | Required | GenBank NO. | Position        |
|-----------------|----------|-------------|-----------------|
|                 |          | DQ223243    | 1-1917          |
|                 |          | DQ223247    | 1-1917          |
|                 |          | DQ223248    | 1-1917          |
|                 |          | DQ223250    | 1-1917          |
|                 |          | DQ223648    | 1226-3142       |
|                 |          | DQ431184    | 7821-9737       |
|                 |          | DQ886586    | 3718-5634       |
|                 |          | EF016118    | 112-2028        |
|                 |          | EU182585    | 1-1917          |
|                 |          | EU918653    | 1-1917          |
|                 |          | EU918657    | 1-1917          |
|                 |          | EU918662    | 1-1917          |
|                 |          | FM201786    | 35079-36995     |
|                 |          | L12241      | 228-2144        |
|                 |          | L12242      | 228-2144        |
|                 |          | U08812      | 1981-3897       |
|                 |          | U58985      | 228-2144        |
|                 |          | U58986      | 228-2144        |
|                 |          | X75073      | 228-2144        |
| <b>TETO_7</b>   |          |             |                 |
| tetracycline    | None     | AJ715499    | 343-2259        |
|                 |          | AM884250    | 75-1991         |
|                 |          | AY190525    | 1-1917          |
|                 |          | AY394560    | 1-1917          |
|                 |          | AY660531    | 14-1930         |
|                 |          | CP000261    | 1101272-1103188 |
|                 |          | FM178797    | 69-1985         |
| <b>TETPA_6</b>  |          |             |                 |
| tetracycline    | None     | AB001076    | 329-1588        |
|                 |          | AB054980    | 1-1260          |
|                 |          | AB054981    | 1-1221          |
|                 |          | AB054982    | 1-1260          |
|                 |          | AE001437    | 1594361-1595623 |
|                 |          | DQ366035    | 559-1818        |
| <b>TETPB_2</b>  |          |             |                 |
| tetracycline    | None     | AE001437    | 1595610-1597565 |
|                 |          | DQ366035    | 1805-3760       |
| <b>TETQ_10</b>  |          |             |                 |
| tetracycline    | None     | AP006841    | 147511-149481   |
|                 |          | AY171589    | 1-1311          |
|                 |          | AY171591    | 1-1311          |
|                 |          | AY171592    | 1-1311          |
|                 |          | DQ093580    | 2372-4342       |

| <b>Resistance type</b> | <b>Required</b> | <b>GenBank NO.</b> | <b>Position</b> |
|------------------------|-----------------|--------------------|-----------------|
|                        |                 | L33696             | 777-2747        |
|                        |                 | U73497             | 308-2317        |
|                        |                 | X58717             | 538-2496        |
|                        |                 | Y08615             | 190-2160        |
|                        |                 | Z21523             | 314-2272        |
| <b>TETS_2</b>          |                 |                    |                 |
| tetracycline           | None            | AB290882           | 15048-16976     |
|                        |                 | EF679789           | 2911-4839       |
| <b>TETT_1</b>          |                 |                    |                 |
| tetracycline           | None            | AY660530           | 48-2000         |
| <b>TETU_1</b>          |                 |                    |                 |
| tetracycline           | None            | U01917             | 1684-1905       |
| <b>TETV_2</b>          |                 |                    |                 |
| tetracycline           | None            | AF030344           | 465-1721        |
|                        |                 | CP000480           | 5286339-5287595 |
| <b>TETW_30</b>         |                 |                    |                 |
| tetracycline           | None            | AF202986           | 73-1989         |
|                        |                 | AJ222769           | 3687-5603       |
|                        |                 | AM180252           | 225942-227858   |
|                        |                 | AM710601           | 702-2618        |
|                        |                 | AM749838           | 1447-3363       |
|                        |                 | AM889118           | 199-2085        |
|                        |                 | AM889119           | 199-2085        |
|                        |                 | AM889120           | 199-2085        |
|                        |                 | AM889121           | 199-2085        |
|                        |                 | AM889122           | 199-2085        |
|                        |                 | AY049983           | 8309-10225      |
|                        |                 | AY196920           | 1-1917          |
|                        |                 | AY196921           | 131-2047        |
|                        |                 | AY485122           | 1-1917          |
|                        |                 | DQ060146           | 2244-4160       |
|                        |                 | DQ294295           | 1058-2974       |
|                        |                 | DQ294299           | 2900-4816       |
|                        |                 | DQ517519           | 2859-4775       |
|                        |                 | DQ519395           | 2857-4773       |
|                        |                 | DQ525023           | 29-1945         |
|                        |                 | EF065524           | 100-2016        |
|                        |                 | EF177463           | 6400-8313       |
|                        |                 | EF421935           | 1-1917          |
|                        |                 | EU434749           | 659-2575        |
|                        |                 | EU434751           | 659-2575        |
|                        |                 | EU434752           | 659-2575        |
|                        |                 | EU434754           | 955-2868        |

| Resistance type                                  | Required | GenBank NO. | Position        |
|--------------------------------------------------|----------|-------------|-----------------|
|                                                  |          | EU434755    | 1456-3372       |
|                                                  |          | EU583804    | 4895-6811       |
|                                                  |          | FJ158004    | 5054-6970       |
| <b>TETX_3</b>                                    |          |             |                 |
| tetracycline                                     | None     | AB097942    | 1-1134          |
|                                                  |          | AJ311171    | 10778-11941     |
|                                                  |          | M37699      | 586-1749        |
| <b>TETY_2</b>                                    |          |             |                 |
| tetracycline                                     | None     | AB089604    | 1-1173          |
|                                                  |          | AB089607    | 1-1173          |
| <b>TETZ_2</b>                                    |          |             |                 |
| tetracycline                                     | None     | AF121000    | 11883-13034     |
|                                                  |          | AF445081    | 3445-4596       |
| <b>TET_3</b>                                     |          |             |                 |
| tetracycline                                     | None     | AL939106    | 239960-241864   |
|                                                  |          | AM238664    | 1024153-1026027 |
|                                                  |          | M74049      | 343-2235        |
| <b>TLRC_1</b> MLSB resistance types              |          |             |                 |
| lincosamide<br>macrolide<br>streptogramin_b      | None     | M57437      | 277-1920        |
| <b>TMRB_2</b>                                    |          |             |                 |
| tunicamycin                                      | None     | D13793      | 181-777         |
|                                                  |          | D50453      | 18384-18980     |
| <b>TOLC_43</b> Multidrug resistance efflux pump. |          |             |                 |
| acriflavin                                       | acrb     | AE005174    | 3991518-3993002 |
| aminoglycoside                                   | mdtf     | AE005674    | 3171245-3172729 |
| beta_lactam                                      | maca     | AE008846    | 11775-13247     |
| glycylcycline                                    | macb     | AE014075    | 3614900-3616384 |
| macrolide                                        | acra     | AE014613    | 3191564-3193036 |
|                                                  | mdte     | AE017220    | 3309329-3310801 |
|                                                  |          | AJ306390    | 412-1869        |
|                                                  |          | AJ421426    | 1-1458          |
|                                                  |          | AM287288    | 1-1482          |
|                                                  |          | AM933172    | 3236524-3237996 |
|                                                  |          | AM933173    | 3213902-3215374 |
|                                                  |          | AP009048    | 3176765-3178249 |
|                                                  |          | AP009240    | 3442216-3443700 |
|                                                  |          | BA000007    | 3924203-3925687 |
|                                                  |          | CP000026    | 3159147-3160619 |
|                                                  |          | CP000034    | 2967946-2969430 |
|                                                  |          | CP000036    | 2896090-2897574 |
|                                                  |          | CP000038    | 3331618-3333102 |

| Resistance type                                    | Required | GenBank NO. | Position        |
|----------------------------------------------------|----------|-------------|-----------------|
|                                                    |          | CP000243    | 3403848-3405332 |
|                                                    |          | CP000247    | 3293175-3294659 |
|                                                    |          | CP000647    | 3772816-3774291 |
|                                                    |          | CP000653    | 3755205-3756686 |
|                                                    |          | CP000783    | 346872-348362   |
|                                                    |          | CP000800    | 3509132-3510616 |
|                                                    |          | CP000802    | 3222940-3224424 |
|                                                    |          | CP000822    | 4100243-4101709 |
|                                                    |          | CP000880    | 4358270-4359748 |
|                                                    |          | CP000886    | 3308925-3310397 |
|                                                    |          | CP000946    | 714977-716461   |
|                                                    |          | CP000964    | 684613-686085   |
|                                                    |          | CP000970    | 3406631-3408115 |
|                                                    |          | CP001063    | 3222921-3224405 |
|                                                    |          | CP001113    | 3337897-3339369 |
|                                                    |          | CP001120    | 3340727-3342199 |
|                                                    |          | CP001127    | 3254803-3256275 |
|                                                    |          | CP001138    | 3270179-3271651 |
|                                                    |          | CU928145    | 3528205-3529683 |
|                                                    |          | CU928158    | 3044344-3045816 |
|                                                    |          | CU928162    | 3625132-3626610 |
|                                                    |          | CU928163    | 3635882-3637360 |
|                                                    |          | FM180568    | 3465543-3467027 |
|                                                    |          | U25178      | 517-1989        |
|                                                    |          | X54049      | 296-1780        |
| <b>TSNR_2</b>                                      |          |             |                 |
| thiostrepton                                       | None     | AB040452    | 1219-2025       |
|                                                    |          | AB094065    | 170-976         |
| <b>VANA_6 vancomycin resistance operons types</b>  |          |             |                 |
| teicoplanin                                        | vanra    | AB247327    | 15235-16263     |
| vancomycin                                         | vanha    | AM296544    | 11492-12520     |
|                                                    | vansa    | AY648035    | 1-1029          |
|                                                    | vanya    | AY648698    | 1-1029          |
|                                                    | vanxa    | AY926880    | 3009-4037       |
|                                                    |          | Y15704      | 23-1051         |
| <b>VANB_13 vancomycin resistance operons types</b> |          |             |                 |
| vancomycin                                         | vanxb    | AB374546    | 37415-38440     |
|                                                    | vanwb    | AE016830    | 2212970-2213995 |
|                                                    | vanrb    | AF192329    | 28835-29860     |
|                                                    | vanyb    | AF310953    | 1-1026          |
|                                                    | vansb    | AF310954    | 1-1026          |
|                                                    | vanhb    | AF550667    | 68-1093         |
|                                                    |          | AJ306726    | 180-1043        |

| <b>Resistance type</b> | <b>Required</b>                            | <b>GenBank NO.</b> | <b>Position</b> |
|------------------------|--------------------------------------------|--------------------|-----------------|
|                        |                                            | AJ306727           | 180-1043        |
|                        |                                            | AY145441           | 1-1026          |
|                        |                                            | AY655712           | 1-1026          |
|                        |                                            | AY665550           | 3-815           |
|                        |                                            | U004566            | 21087           |
|                        |                                            | U94526             | 1-801           |
| <b>VANC_3</b>          | <b>vancomycin resistance operons types</b> |                    |                 |
| vancomycin             | vansc                                      | AF162694           | 1411-2439       |
|                        | vanrc                                      | DQ022190           | 205-1233        |
|                        | vant                                       | EU151772           | 31-1059         |
|                        | vanxyc                                     |                    |                 |
| <b>VAND_8</b>          | <b>vancomycin resistance operons types</b> |                    |                 |
| teicoplanin            | vanrd                                      | AB183866           | 72-1100         |
| vancomycin             | vansd                                      | AF130997           | 4083-5111       |
|                        | vanxd                                      | AF153050           | 1321-2349       |
|                        | vanhd                                      | AF175293           | 4079-5083       |
|                        | vanyd                                      | AF277571           | 1262-2290       |
|                        |                                            | AY489045           | 4010-5038       |
|                        |                                            | DQ172830           | 3983-5011       |
|                        |                                            | EF508033           | 4030-5034       |
| <b>VANE_1</b>          | <b>vancomycin resistance operons types</b> |                    |                 |
| vancomycin             | vante                                      | AF430807           | 2976-4031       |
|                        | vanre                                      |                    |                 |
|                        | vanxye                                     |                    |                 |
|                        | vanse                                      |                    |                 |
| <b>VANG_1</b>          | <b>vancomycin resistance operons types</b> |                    |                 |
| vancomycin             | vanug                                      | AF253562           | 3715-4761       |
|                        | vanwg                                      |                    |                 |
|                        | vantg                                      |                    |                 |
|                        | vansg                                      |                    |                 |
|                        | vanrg                                      |                    |                 |
|                        | vanxyg                                     |                    |                 |
|                        | vanyg                                      |                    |                 |
| <b>VANHA_5</b>         | <b>vancomycin resistance operons types</b> |                    |                 |
| teicoplanin            | vanra                                      | AB247327           | 14274-15239     |
| vancomycin             | vansa                                      | AM296544           | 12516-13481     |
|                        | vana                                       | AY926880           | 2048-3013       |
|                        | vanya                                      | DQ018710           | 5109-6074       |
|                        | vanxa                                      | Y15705             | 152-1117        |
| <b>VANHB_4</b>         | <b>vancomycin resistance operons types</b> |                    |                 |
| vancomycin             | vanxb                                      | AB374546           | 36451-37419     |
|                        | vanwb                                      | AE016830           | 2213991-2214959 |
|                        | vanb                                       | AF192329           | 27871-28839     |

| <b>Resistance type</b> | <b>Required</b>                            | <b>GenBank NO.</b> | <b>Position</b> |
|------------------------|--------------------------------------------|--------------------|-----------------|
|                        | vanrb<br>vanyb<br>vansb                    | U35369             | 4007-4975       |
| <b>VANHD_6</b>         | <b>vancomycin resistance operons types</b> |                    |                 |
| teicoplanin            | vanrd                                      | AB242319           | 3045-4013       |
| vancomycin             | vansd                                      | AF130997           | 3122-4087       |
|                        | vand                                       | AF153050           | 357-1325        |
|                        | vanxd                                      | AF175293           | 3115-4083       |
|                        | vanyd                                      | AY489045           | 3046-4014       |
|                        |                                            | EF508033           | 3066-4034       |
| <b>VANRA_6</b>         | <b>vancomycin resistance operons types</b> |                    |                 |
| teicoplanin            | vanha                                      | AB247327           | 12232-12924     |
| vancomycin             | vansa                                      | AM296544           | 14831-15523     |
|                        | vana                                       | CP000485           | 3095656-3096357 |
|                        | vanya                                      | DQ018710           | 3048-3740       |
|                        | vanxa                                      | DQ018711           | 1-693           |
|                        |                                            | Y15706             | 25-717          |
| <b>VANRB_3</b>         | <b>vancomycin resistance operons types</b> |                    |                 |
| vancomycin             | vanxb                                      | AB374546           | 32627-33283     |
|                        | vanwb                                      | AE016830           | 2218129-2218788 |
|                        | vanb                                       | U35369             | 178-837         |
|                        | vanyb                                      |                    |                 |
|                        | vansb                                      |                    |                 |
|                        | vanhb                                      |                    |                 |
| <b>VANRC_4</b>         | <b>vancomycin resistance operons types</b> |                    |                 |
| vancomycin             | vanc                                       | AF162694           | 5193-5885       |
|                        | vansc                                      | AY033089           | 2789-3481       |
|                        | vant                                       | AY033764           | 3846-4538       |
|                        | vanxyc                                     | EU151752           | 3849-4541       |
| <b>VANRD_5</b>         | <b>vancomycin resistance operons types</b> |                    |                 |
| teicoplanin            | vansd                                      | AB242319           | 1-696           |
| vancomycin             | vand                                       | AF130997           | 77-772          |
|                        | vanxd                                      | AF175293           | 71-766          |
|                        | vanhd                                      | AY489045           | 1-696           |
|                        | vanyd                                      | DQ172830           | 1-696           |
| <b>VANRE_1</b>         | <b>vancomycin resistance operons types</b> |                    |                 |
| vancomycin             | vante                                      | AF430807           | 6754-7440       |
|                        | vanxye                                     |                    |                 |
|                        | vanse                                      |                    |                 |
|                        | vane                                       |                    |                 |
| <b>VANRG_1</b>         | <b>vancomycin resistance operons types</b> |                    |                 |
| vancomycin             | vanug                                      | AY271782           | 17324-18028     |
|                        | vang                                       |                    |                 |

| Resistance type | Required                                   | GenBank NO. | Position          |
|-----------------|--------------------------------------------|-------------|-------------------|
|                 | vanwg<br>vantg<br>vansg<br>vanxyg<br>vanyg |             |                   |
| <b>VANSA_7</b>  | vancomycin resistance operons types        |             |                   |
| teicoplanin     | vanra                                      | AB247327    | 12905-14056       |
| vancomycin      | vanha                                      | AM296544    | 13699-14850       |
|                 | vana                                       | AY926880    | 674-1831          |
|                 | vanya                                      | CP000485    | 3094512-3095663   |
|                 | vanxa                                      | DQ018710    | 3721-4878         |
|                 |                                            | DQ018711    | 713-1837          |
|                 |                                            | Y15707      | 1-1146            |
| <b>VANSB_4</b>  | vancomycin resistance operons types        |             |                   |
| vancomycin      | vanxb                                      | AB374546    | 33289-34629       |
|                 | vanwb                                      | AE016830    | 2216786-2218126   |
|                 | vanb                                       | AJ272437    | 3-428             |
|                 | vanrb                                      | AY035712    | 1924-2565         |
|                 | vanyb                                      |             |                   |
|                 | vanhb                                      |             |                   |
| <b>VANSC_6</b>  | vancomycin resistance operons types        |             |                   |
| vancomycin      | vanc                                       | AF162694    | 5878-6960         |
|                 | vanrc                                      | AY033089    | 3553-4608         |
|                 | vant                                       | AY033764    | 4604-5659         |
|                 | vanxyc                                     | DQ022190    | 4672-5754         |
|                 |                                            | EU151752    | 4630-5661         |
|                 |                                            | EU151753    | 4629-5660         |
| <b>VANSD_6</b>  | vancomycin resistance operons types        |             |                   |
| teicoplanin     | vanrd                                      | AB183865    | 1-1143            |
| vancomycin      | vand                                       | AF130997    | 765-1907          |
|                 | vanxd                                      | AF175293    | 759-14511427-1900 |
|                 | vanhd                                      | AY489045    | 689-1831          |
|                 | vanyd                                      | DQ172830    | 689-1831          |
|                 |                                            | EF508033    | 709-1851          |
| <b>VANSE_2</b>  | vancomycin resistance operons types        |             |                   |
| vancomycin      | vante                                      | AF430807    | 7433-8503         |
|                 | vanre                                      | AY700375    | 1-810             |
|                 | vanxye                                     |             |                   |
|                 | vane                                       |             |                   |
| <b>VANSG_1</b>  | vancomycin resistance operons types        |             |                   |
| vancomycin      | vanug                                      | AF253562    | 722-1822          |
|                 | vang                                       |             |                   |
|                 | vanwg                                      |             |                   |

| <b>Resistance type</b> | <b>Required</b>                                             | <b>GenBank NO.</b>                           | <b>Position</b>                                            |
|------------------------|-------------------------------------------------------------|----------------------------------------------|------------------------------------------------------------|
|                        | vantg<br>vanrg<br>vanxyg<br>vanyg                           |                                              |                                                            |
| <b>VANTE_1</b>         | vancomycin resistance operons types                         |                                              |                                                            |
| vancomycin             | vanre<br>vanxye<br>vanse<br>vane                            | AF430807                                     | 4577-6682                                                  |
| <b>VANTG_2</b>         | vancomycin resistance operons types                         |                                              |                                                            |
| vancomycin             | vanug<br>vang<br>vanwg<br>vansg<br>vanrg<br>vanxyg<br>vanyg | AF253562<br>AY271782                         | 5518-7650<br>22852-24987                                   |
| <b>VANT_2</b>          | vancomycin resistance operons types                         |                                              |                                                            |
| vancomycin             | vanc<br>vansc<br>vanrc<br>vanxyc                            | AF162694<br>DQ022190                         | 3008-5101<br>1802-3895                                     |
| <b>VANUG_1</b>         | vancomycin resistance operons types                         |                                              |                                                            |
| vancomycin             | vang<br>vanwg<br>vantg<br>vansg<br>vanrg<br>vanxyg<br>vanyg | AY271782                                     | 17095-17319                                                |
| <b>VANWB_4</b>         | vancomycin resistance operons types                         |                                              |                                                            |
| vancomycin             | vanxb<br>vanb<br>vanrb<br>vanyb<br>vansb<br>vanhb           | AB374546<br>AE016830<br>AF192329<br>AY655718 | 35627-36451<br>2214959-2215783<br>27047-27871<br>3069-3893 |
| <b>VANWG_1</b>         | vancomycin resistance operons types                         |                                              |                                                            |
| vancomycin             | vanug<br>vang<br>vantg<br>vansg<br>vanrg                    | AY271782                                     | 20202-21044                                                |



| Resistance type  | Required                            | GenBank NO. | Position        |
|------------------|-------------------------------------|-------------|-----------------|
|                  | vanxyg<br>vanyg                     |             |                 |
| <b>VANXA_6</b>   | vancomycin resistance operons types |             |                 |
| teicoplanin      | vanra                               | AB247327    | 16272-16877     |
| vancomycin       | vanha                               | AF516335    | 4785-5390       |
|                  | vansa                               | AM296544    | 10878-11483     |
|                  | vana                                | AY926880    | 4046-4651       |
|                  | vanya                               | DQ018710    | 7107-7712       |
|                  |                                     | Y15708      | 20-625          |
| <b>VANXB_9</b>   | vancomycin resistance operons types |             |                 |
| vancomycin       | vanwb                               | AB374546    | 38449-39054     |
|                  | vanb                                | AE016830    | 2212356-2212961 |
|                  | vanrb                               | AF192329    | 29869-30474     |
|                  | vanyb                               | AF203407    | 2-541           |
|                  | vansb                               | AF203411    | 2-541           |
|                  | vanhb                               | AF550667    | 1102-1707       |
|                  |                                     | AJ272436    | 2-475           |
|                  |                                     | AY035709    | 2-538           |
|                  |                                     | U35369      | 6005-6610       |
| <b>VANXD_6</b>   | vancomycin resistance operons types |             |                 |
| teicoplanin      | vanrd                               | AB242319    | 5046-5651       |
| vancomycin       | vansd                               | AF130997    | 5120-5725       |
|                  | vand                                | AF175293    | 5116-5721       |
|                  | vanhd                               | AY489045    | 5047-5652       |
|                  | vanyd                               | DQ172830    | 5017-5625       |
|                  |                                     | EF508033    | 5067-5672       |
| <b>VANXYC_10</b> | vancomycin resistance operons types |             |                 |
| vancomycin       | vanc                                | AF162694    | 2439-3008       |
|                  | vansc                               | AY033089    | 1-570           |
|                  | vanrc                               | AY033764    | 1075-1644       |
|                  | vant                                | EU151752    | 1078-1647       |
|                  |                                     | EU151753    | 1078-1647       |
|                  |                                     | EU151754    | 1078-1647       |
|                  |                                     | EU151755    | 1078-1647       |
|                  |                                     | EU151756    | 1078-1647       |
|                  |                                     | EU151757    | 1078-1647       |
|                  |                                     | EU151758    | 1078-1647       |
| <b>VANXYE_1</b>  | vancomycin resistance operons types |             |                 |
| vancomycin       | vante                               | AF430807    | 4006-4584       |
|                  | vanre                               |             |                 |
|                  | vanse                               |             |                 |
|                  | vane                                |             |                 |
| <b>VANXYG_2</b>  | vancomycin resistance operons types |             |                 |

| <b>Resistance type</b> | <b>Required</b>                            | <b>GenBank NO.</b> | <b>Position</b>   |
|------------------------|--------------------------------------------|--------------------|-------------------|
| vancomycin             | vanug                                      | AF253562           | 4761-5522         |
|                        | vang                                       | DQ222944           | 5050-5811         |
|                        | vanwg                                      |                    |                   |
|                        | vantg                                      |                    |                   |
|                        | vansg                                      |                    |                   |
|                        | vanrg                                      |                    |                   |
|                        | vanyg                                      |                    |                   |
| <b>VANYA_4</b>         | <b>vancomycin resistance operons types</b> |                    |                   |
| teicoplanin            | vanra                                      | AB247327           | 18125-19033       |
| vancomycin             | vanha                                      | AM296544           | 9539-10447        |
|                        | vansa                                      | DQ018710           | 8162-9043         |
|                        | vana                                       | Y17303             | 1-891             |
|                        | vanxa                                      |                    |                   |
| <b>VANYB_3</b>         | <b>vancomycin resistance operons types</b> |                    |                   |
| vancomycin             | vanxb                                      | AB374546           | 34803-35606       |
|                        | vanwb                                      | AE016830           | 2215804-2216607   |
|                        | vanb                                       | U35369             | 2359-3162         |
|                        | vanrb                                      |                    |                   |
|                        | vansb                                      |                    |                   |
|                        | vanhb                                      |                    |                   |
| <b>VANYD_5</b>         | <b>vancomycin resistance operons types</b> |                    |                   |
| teicoplanin            | vanrd                                      | AB242319           | 1958-3022         |
| vancomycin             | vansd                                      | AF130997           | 2032-3099         |
|                        | vand                                       | AF175293           | 2025-3092         |
|                        | vanxd                                      | AY082011           | 4195-4914-3849419 |
|                        | vanhd                                      | EF508033           | 9                 |
|                        |                                            |                    | 1976-3043         |
| <b>VANYG_2</b>         | <b>vancomycin resistance operons types</b> |                    |                   |
| vancomycin             | vanug                                      | AF253562           | 1962-2795         |
|                        | vang                                       | AY271782           | 19288-19650       |
|                        | vanwg                                      |                    |                   |
|                        | vantg                                      |                    |                   |
|                        | vansg                                      |                    |                   |
|                        | vanrg                                      |                    |                   |
|                        | vanxyg                                     |                    |                   |
| <b>VANZ_3</b>          | <b>vancomycin resistance operons types</b> |                    |                   |
| teicoplanin            | None                                       | AB247327           | 19189-19671       |
|                        |                                            | AM296544           | 8901-9383         |
|                        |                                            | Y17304             | 1-483             |
| <b>VATA_2</b>          | <b>MLSB resistance types</b>               |                    |                   |
| streptogramin_a        | None                                       | AF117258           | 2207-2863         |
|                        |                                            | L07778             | 258-914           |
| <b>VATB_5</b>          | <b>MLSB resistance types</b>               |                    |                   |

| <b>Resistance type</b> | <b>Required</b>              | <b>GenBank NO.</b> | <b>Position</b> |
|------------------------|------------------------------|--------------------|-----------------|
| streptogramin_a        | None                         | CP000568           | 2003461-2004093 |
|                        |                              | CP000728           | 306010-306645   |
|                        |                              | CP000939           | 316193-316828   |
|                        |                              | CP000962           | 295779-296414   |
|                        |                              | U19459             | 67-702          |
| <b>VATC_1</b>          | <b>MLSB resistance types</b> |                    |                 |
| streptogramin_a        | None                         | AF015628           | 1307-1942       |
| <b>VATD_1</b>          | <b>MLSB resistance types</b> |                    |                 |
| streptogramin_a        | None                         | AF368302           | 2717-3328       |
| <b>VATE_7</b>          | <b>MLSB resistance types</b> |                    |                 |
| streptogramin_a        | None                         | AF139725           | 63-704          |
|                        |                              | AJ488494           | 9461-10102      |
|                        |                              | AY008284           | 1-642           |
|                        |                              | AY043210           | 1-642           |
|                        |                              | AY043211           | 1-642           |
|                        |                              | AY043212           | 1-642           |
|                        |                              | AY043213           | 1-642           |
| <b>VGAA_3</b>          | <b>MLSB resistance types</b> |                    |                 |
| streptogramin_a        | None                         | AF117259           | 2437-4002       |
|                        |                              | AF186237           | 5065-6636       |
|                        |                              | FJ207465           | 2057-3622       |
| <b>VGAB_1</b>          | <b>MLSB resistance types</b> |                    |                 |
| streptogramin_a        | None                         | U82085             | 629-2284        |
| <b>VGBA_2</b>          | <b>MLSB resistance types</b> |                    |                 |
| streptogramin_a        | None                         | AF117258           | 2872-3768       |
|                        |                              | M20129             | 641-1537        |
| <b>VGBB_1</b>          | <b>MLSB resistance types</b> |                    |                 |
| streptogramin_a        | None                         | AF015628           | 399-1283        |
| <b>VPH_2</b>           | <b>MLSB resistance types</b> |                    |                 |
| viomycin               | None                         | AY263398           | 28679-29557     |
|                        |                              | X02393             | 79-957          |
| <b>YKKC_2</b>          | <b>MLSB resistance types</b> |                    |                 |
| na_antimicrobials      | ykkd                         | AJ002571           | 28642-28977     |
|                        |                              | CP000560           | 1253674-1254009 |
| <b>YKKD_2</b>          | <b>MLSB resistance types</b> |                    |                 |
| na_antimicrobials      | ykkc                         | AJ002571           | 28980-29294     |
|                        |                              | CP000560           | 1254012-1254323 |

**Supplementary Table 2 The susceptibility testing and microarray result of bacterial isolates**

| Antibiotic      | <i>E. coli</i> |                 |       |     | <i>P. mirabilis</i> |     | <i>K. pneumoniae</i> |     | <i>K. pneumoniae</i> |     | <i>A. xylosoxidans</i> |      | <i>A. baumannii</i> |     |
|-----------------|----------------|-----------------|-------|-----|---------------------|-----|----------------------|-----|----------------------|-----|------------------------|------|---------------------|-----|
|                 | SYF9           |                 | SYF19 |     | SYF13               |     | X02738               |     | X03804               |     | X02736                 |      | X00059              |     |
| Tetracycline    | S <sup>1</sup> | <6 <sup>2</sup> | R     | >15 | R                   | >40 | R                    | >10 | R                    | >10 | R                      | >10  | R                   | >80 |
| Cephalexin      | S              | <9              | R     | >10 | R                   | >65 | R                    | >10 | R                    | >14 | R                      | >11  | R                   | >10 |
| Amoxicillin     | S              | <9              | R     | >10 | R                   | >10 | R                    | >10 | R                    | >10 | R                      | >10  | R                   | >10 |
| Ampicillin      | S              | <9              | R     | >10 | R                   | >10 | R                    | >10 | R                    | >10 | R                      | >10  | R                   | >10 |
| Streptomycin    | S/I            | <7              | R     | >25 | R                   | >10 | R                    | >15 | R                    | >15 | R                      | >13  | R                   | >50 |
| Kanamycin       | S              | <6              | R     | >15 | R                   | >60 | R                    | >20 | R                    | >25 | R                      | >100 | R                   | >50 |
| Chloramphenicol | S              | <6              | R     | >10 | R                   | >30 | R                    | >40 | R                    | >40 | R                      | >13  | R                   | >60 |
| Gentamycin      | S              | 0               | R     | >10 | R                   | >20 | R                    | >30 | R                    | >25 | R                      | >15  | R                   | >50 |

<sup>1</sup>: susceptibility testing result, “R” represents the isolate resist to these antibiotics, “S” represents the isolate is sensitive to these antibiotics, and “I” represents an intermediate state.

<sup>2</sup>: antibiotic resistance gene type values in microarray.

**Supplementary Table 3 Specific PCR detection of resistance genes (selected) in the two *E. coli* isolates**

| Target (acc. No) | Gene type | Primer set                                         | Presence(+)/Absence (-) in: |      | Microarray Value for: |       |
|------------------|-----------|----------------------------------------------------|-----------------------------|------|-----------------------|-------|
|                  |           |                                                    | SYF9                        | SYF9 | SYF9                  | SYF19 |
| AF550415         | AAC3IIA   | F: GGAAGGCAATAACGGAGGCA<br>R: CGGGGGCTTGAACCAGAAAT | -                           | +    | <3                    | 15.2  |
| AY138987         | AAC3IIA   | F: CACCGTTTCTTCCAAGCATC<br>R: TGGCACTGTGATGGGATACG | -                           | +    | <3                    | 11.3  |
| AF083408         | APH3IA    | F: ACGAATGAATAACGGTTTGG<br>R: CTGTAATGAAGGAGAAAAC  | -                           | +    | <3                    | 15.0  |
| AM884371         | APH3IA    | F: TCACCGAGGCAGTTCCATAG<br>R: TTACTCACCCTGCGATCCC  | -                           | +    | <3                    | 10.4  |
| AF071555         | CML_E3    | F: GTGATTTTTGGTCCGCTCTC<br>R: CATCGCCAGTATAGCCAAAG | -                           | +    | <3                    | 10.5  |
| FM179941         | CML_E3    | F: CCGTGAAGACAATACCGACC<br>R: CGGCTTTTTGGGTTTACT   | -                           | +    | <3                    | 22.3  |
| AF368302         | ERMB      | F: CTTTGGCGTGTTTCATTGCT<br>R: CGTGCGTCTGACATCTATCT | -                           | +    | <3                    | 10.6  |

**Supplementary Table 4 Detailed information of each volunteer and the number of antibiotic resistance gene type detected**

| Sample No. | Group | Male /<br>Female | Ages | No. of antibiotic<br>resistance types |
|------------|-------|------------------|------|---------------------------------------|
| 176XH      | CH    | F                | 4    | 9                                     |
| 168XH      | CH    | M                | 3    | 7                                     |
| 186XH      | CH    | F                | 5    | 9                                     |
| 187XH      | CH    | F                | 5    | 9                                     |
| 178XH      | CH    | M                | 3    | 7                                     |
| 182XH      | CH    | F                | 3    | 9                                     |
| 177XH      | CH    | F                | 3    | 7                                     |
| 171XH      | CH    | F                | 4    | 6                                     |
| 181XH      | CH    | F                | 4    | 12                                    |
| 188XH      | CH    | F                | 4    | 8                                     |
| 185XH      | CH    | F                | 5    | 10                                    |
| 170XH      | CH    | M                | 4    | 6                                     |
| 172XH      | CH    | F                | 4    | 7                                     |
| 190XH      | CH    | F                | 4    | 10                                    |
| 183XH      | CH    | M                | 3    | 10                                    |
| 173XH      | CH    | M                | 4    | 5                                     |
| 189XH      | CH    | F                | 4    | 7                                     |
| 184XH      | CH    | F                | 4    | 8                                     |
| 175XH      | CH    | F                | 4    | 9                                     |
| 174XH      | CH    | M                | 4    | 4                                     |
| 180XH      | CH    | M                | 5    | 11                                    |
| 179XH      | CH    | M                | 2    | 6                                     |
| 169XH      | CH    | M                | 3    | 9                                     |
| 255A       | SC    | M                | 10   | 14                                    |
| 253A       | SC    | M                | 10   | 11                                    |

| Sample No. | Group | Male /<br>Female | Ages | No. of antibiotic<br>resistance types |
|------------|-------|------------------|------|---------------------------------------|
| 231A       | SC    | F                | 10   | 15                                    |
| 246A       | SC    | F                | 11   | 11                                    |
| 235A       | SC    | M                | 11   | 16                                    |
| 240A       | SC    | F                | 10   | 16                                    |
| 239A       | SC    | F                | 11   | 14                                    |
| 254A       | SC    | F                | 11   | 16                                    |
| 243A       | SC    | M                | 11   | 12                                    |
| 237A       | SC    | M                | 10   | 12                                    |
| 251A       | SC    | F                | 10   | 12                                    |
| 257A       | SC    | M                | 10   | 15                                    |
| 233A       | SC    | F                | 10   | 17                                    |
| 230A       | SC    | M                | 10   | 19                                    |
| 232A       | SC    | F                | 10   | 16                                    |
| 247A       | SC    | F                | 11   | 13                                    |
| 238A       | SC    | M                | 10   | 14                                    |
| 229A       | SC    | F                | 10   | 13                                    |
| 249A       | SC    | F                | 10   | 10                                    |
| 236A       | SC    | F                | 11   | 16                                    |
| 252A       | SC    | M                | 10   | 12                                    |
| 241A       | SC    | M                | 10   | 13                                    |
| 250A       | SC    | F                | 11   | 14                                    |
| 245A       | SC    | M                | 10   | 12                                    |
| 234A       | SC    | F                | 10   | 32                                    |
| 212A       | HSS   | M                | 16   | 10                                    |
| 211A       | HSS   | M                | 16   | 17                                    |
| 210A       | HSS   | F                | 15   | 10                                    |
| 213A       | HSS   | F                | 15   | 10                                    |

| Sample No. | Group | Male /<br>Female | Ages | No. of antibiotic<br>resistance types |
|------------|-------|------------------|------|---------------------------------------|
| 215A       | HSS   | M                | 15   | 11                                    |
| 223A       | HSS   | F                | 15   | 11                                    |
| 224A       | HSS   | F                | 16   | 12                                    |
| 227A       | HSS   | F                | 15   | 13                                    |
| 225A       | HSS   | F                | 16   | 14                                    |
| 221A       | HSS   | M                | 17   | 12                                    |
| 214A       | HSS   | M                | 15   | 13                                    |
| 220A       | HSS   | M                | 17   | 18                                    |
| 196A       | HSS   | M                | 17   | 15                                    |
| 195A       | HSS   | M                | 17   | 28                                    |
| 193A       | HSS   | M                | 16   | 14                                    |
| 197A       | HSS   | M                | 17   | 11                                    |
| 199A       | HSS   | M                | 18   | 11                                    |
| 202A       | HSS   | M                | 17   | 15                                    |
| 198A       | HSS   | M                | 18   | 22                                    |
| 204A       | HSS   | F                | 16   | 13                                    |
| 192A       | HSS   | M                | 17   | 24                                    |
| 200A       | HSS   | M                | 18   | 14                                    |
| 194A       | HSS   | M                | 17   | 14                                    |
| 203A       | HSS   | M                | 17   | 14                                    |
| 226A       | HSS   | F                | 16   | 21                                    |
| 228A       | HSS   | F                | 16   | 31                                    |
| 133        | AD    | F                | 26   | 38                                    |
| 164        | AD    | M                | 27   | 26                                    |
| 163        | AD    | M                | 28   | 22                                    |
| 66         | AD    | F                | 28   | 16                                    |
| 125        | AD    | F                | 29   | 28                                    |



| Sample No. | Group | Male /<br>Female | Ages | No. of antibiotic<br>resistance types |
|------------|-------|------------------|------|---------------------------------------|
| 53         | AD    | F                | 30   | 31                                    |
| 162        | AD    | F                | 31   | 23                                    |
| 91         | AD    | M                | 32   | 17                                    |
| 54         | AD    | M                | 33   | 32                                    |
| 61         | AD    | M                | 35   | 28                                    |
| 95         | AD    | F                | 35   | 32                                    |
| 122        | AD    | F                | 35   | 25                                    |
| 118        | AD    | M                | 36   | 24                                    |
| 68         | AD    | M                | 37   | 16                                    |
| 55         | AD    | F                | 38   | 35                                    |
| 77         | AD    | M                | 39   | 16                                    |
| 142        | AD    | M                | 39   | 20                                    |
| 120        | AD    | F                | 39   | 23                                    |
| 113        | AD    | M                | 39   | 20                                    |
| 123        | AD    | F                | 40   | 27                                    |
| 76         | AD    | M                | 40   | 27                                    |
| 59         | AD    | M                | 40   | 26                                    |
| 74         | AD    | F                | 41   | 21                                    |
| 71         | AD    | M                | 42   | 23                                    |
| 100        | AD    | F                | 42   | 28                                    |
| 92         | AD    | F                | 43   | 48                                    |
| 67         | AD    | M                | 43   | 30                                    |
| 80         | AD    | F                | 43   | 27                                    |
| 72         | AD    | M                | 43   | 24                                    |
| 56         | AD    | M                | 43   | 34                                    |
| 102        | AD    | F                | 43   | 40                                    |
| 73         | AD    | F                | 44   | 28                                    |

| Sample No. | Group | Male /<br>Female | Ages | No. of antibiotic<br>resistance types |
|------------|-------|------------------|------|---------------------------------------|
| 65         | AD    | M                | 44   | 24                                    |
| 57         | AD    | M                | 44   | 31                                    |
| 130        | AD    | M                | 46   | 32                                    |
| 134        | AD    | F                | 46   | 31                                    |
| 63         | AD    | M                | 47   | 31                                    |
| 112        | AD    | F                | 47   | 40                                    |
| 121        | AD    | F                | 47   | 32                                    |
| 117        | AD    | M                | 48   | 18                                    |
| 98         | AD    | F                | 49   | 31                                    |
| 126        | AD    | F                | 49   | 35                                    |
| 70         | AD    | M                | 50   | 22                                    |
| 81         | AD    | M                | 50   | 21                                    |
| 115        | AD    | F                | 50   | 25                                    |
| 75         | AD    | M                | 51   | 21                                    |
| 87         | AD    | M                | 52   | 14                                    |
| 58         | AD    | M                | 52   | 33                                    |
| 129        | AD    | F                | 52   | 34                                    |
| 137        | AD    | F                | 53   | 20                                    |

**Supplementary Table 5 Sample information and antibiotic resistance gene type number in each group**

| Group | No. of samples | Male/Female | Average ages (SE) | No. of total gene type | No. of average gene type (SE) |
|-------|----------------|-------------|-------------------|------------------------|-------------------------------|
| CH    | 23             | 9/14        | 4±1               | 25                     | 8±2                           |
| SC    | 25*            | 11/13       | 10±1              | 37                     | 14±2                          |
| HSS   | 26             | 9/17        | 16±1              | 58                     | 15±6                          |
| AD    | 51*            | 24/26       | 41±7              | 72                     | 25±4                          |

\* Outliers according to statistical detection (one in SC and one in AD group) are removed in all analyses.

### Supplementary Figure 1

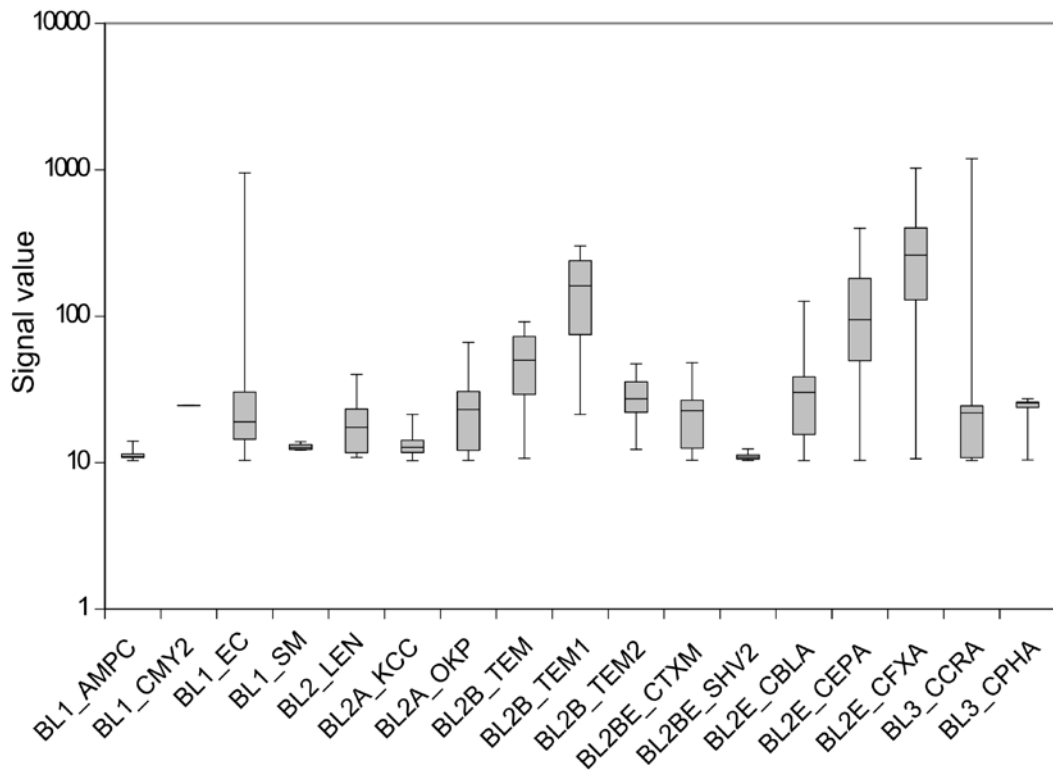

Figure S1 Box plots of hybridization signal value range for 17 beta-lactamase gene types in 124 samples. Boxes represent the interquartile range (IQR) between the first and third quartiles, and the line within the boxes denotes the median value. The whiskers denote the maximum and the minimum value.

## Supplementary Figure 2

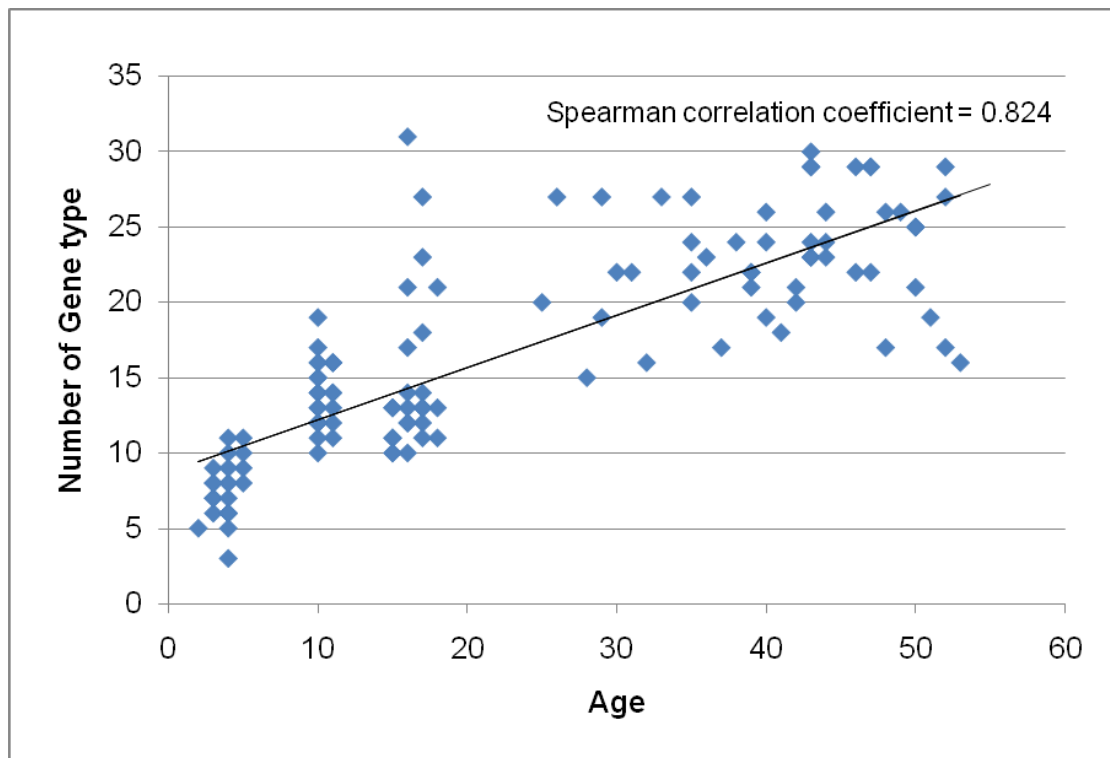

Figure S2 Spearman correlation between the age of each individual and the number of the resistance gene types.
